# Supplementary material for: Exploring the possibility of using fluorine-involved non-conjugated electron-withdrawing groups for thermally activated delayed fluorescence emitters by TD-DFT calculation
Source: publisher site journal article supplement (doi:10.3762/bjoc.17.21), 2021-01-21
Supplement: Additional file 1 [file 1860-5397-17-21-S1.pdf]

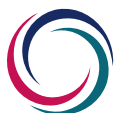

## Supporting Information

for

### Exploring the possibility of using fluorine-involved non-conjugated electron-withdrawing groups for thermally activated delayed fluorescence emitters by TD-DFT calculation

Dongyang Chen and Eli Zysman-Colman

*Beilstein J. Org. Chem.* **2021**, *17*, 210–223. doi:10.3762/bjoc.17.21

**Calculation details, Cartesian coordinates of all the molecules, SOCME calculation result, and HONTOs and LUNTOs of 2CzCF<sub>3</sub>/5CzCF<sub>3</sub>, 2CzOCF<sub>3</sub>/5CzOCF<sub>3</sub>, 2CzSCF<sub>3</sub>/5CzSCF<sub>3</sub>, and 2CzSF<sub>5</sub>/5CzSF<sub>5</sub> in higher-lying excited states are available in supporting information**

## Table of Contents

|                                                                              |     |
|------------------------------------------------------------------------------|-----|
| Theoretical Calculations .....                                               | S3  |
| Cartesian coordinates.....                                                   | S3  |
| HONTOs and LUNTOs of <b>2CzOCF<sub>3</sub></b> in higher energy states ..... | S49 |
| HONTOs and LUNTOs of <b>5CzOCF<sub>3</sub></b> in higher energy states ..... | S49 |
| HONTOs and LUNTOs of <b>2CzSCF<sub>3</sub></b> in higher energy states.....  | S50 |
| HONTOs and LUNTOs of <b>5CzSCF<sub>3</sub></b> in higher energy states.....  | S50 |
| HONTOs and LUNTOs of <b>2CzSF<sub>5</sub></b> in higher energy states.....   | S51 |
| HONTOs and LUNTOs of <b>5CzSF<sub>5</sub></b> in higher energy states.....   | S51 |
| SOCME calculation result .....                                               | S51 |
| References .....                                                             | S88 |

### *Theoretical Calculations*

All ground state optimizations have been carried out at the Density Functional Theory (DFT) level with Gaussian09[1] using the PBE0 functional and the 6-31G(d,p) basis set. Excited state calculations have been performed at Time-Dependent DFT (TD-DFT) within the Tamm-Dancoff approximation (TDA) using the same functional and basis set as for ground state geometry optimization.[2,3] This methodology has been demonstrated to show quantitative estimate of  $\Delta E_{ST}$  in comparison to experiment.[4] The results of spin-orbit coupling matrix element (SOCME) calculation were extracted by PySOC program after TDA calculation.[5]

### *Cartesian coordinates*

Optimized Atomic coordinates obtained from DFT calculations of both Type I and Type II molecules

#### **2CzCF<sub>3</sub>**

| Tag | Symbol | X        | Y        | Z        |
|-----|--------|----------|----------|----------|
| 1   | C      | -1.1756  | 0.567685 | -1.02455 |
| 2   | C      | -1.15437 | 1.123003 | -2.29969 |
| 3   | C      | 0.057165 | 1.405356 | -2.91819 |
| 4   | C      | 1.242713 | 1.081274 | -2.27848 |
| 5   | C      | 1.236724 | 0.522888 | -0.99739 |
| 6   | C      | 0.019542 | 0.309716 | -0.32884 |
| 7   | N      | -2.43276 | 0.26609  | -0.45372 |
| 8   | N      | 2.481995 | 0.180292 | -0.43782 |
| 9   | C      | -3.32676 | 1.196935 | 0.058078 |
| 10  | C      | -4.52145 | 0.531909 | 0.414365 |
| 11  | C      | -4.3369  | -0.86276 | 0.082863 |
| 12  | C      | -3.03733 | -0.98574 | -0.45863 |
| 13  | C      | 2.9179   | -1.11008 | -0.15184 |
| 14  | C      | 4.252792 | -1.04575 | 0.305416 |

|    |   |          |          |          |
|----|---|----------|----------|----------|
| 15 | C | 4.632941 | 0.34828  | 0.294564 |
| 16 | C | 3.514278 | 1.073106 | -0.17473 |
| 17 | C | -5.14511 | -1.9965  | 0.17928  |
| 18 | C | -4.65352 | -3.21468 | -0.26907 |
| 19 | C | -3.36618 | -3.31087 | -0.81568 |
| 20 | C | -2.53943 | -2.20002 | -0.92074 |
| 21 | C | -3.15434 | 2.564851 | 0.243434 |
| 22 | C | -4.21623 | 3.272566 | 0.792399 |
| 23 | C | -5.41171 | 2.634292 | 1.151088 |
| 24 | C | -5.57052 | 1.267228 | 0.967719 |
| 25 | C | 5.797723 | 1.035327 | 0.637441 |
| 26 | C | 5.82757  | 2.41749  | 0.509739 |
| 27 | C | 4.704897 | 3.118322 | 0.048978 |
| 28 | C | 3.531569 | 2.459734 | -0.29783 |
| 29 | C | 2.240244 | -2.31798 | -0.28518 |
| 30 | C | 2.924493 | -3.47602 | 0.061016 |
| 31 | C | 4.247417 | -3.4342  | 0.521587 |
| 32 | C | 4.91714  | -2.2249  | 0.645084 |
| 33 | C | -0.06772 | -0.13372 | 1.118909 |
| 34 | F | -0.96054 | 0.612011 | 1.784507 |
| 35 | F | 1.089162 | -0.01316 | 1.773107 |
| 36 | F | -0.45702 | -1.41541 | 1.217783 |
| 37 | H | -2.10141 | 1.314848 | -2.79284 |
| 38 | H | 0.075552 | 1.83731  | -3.91349 |
| 39 | H | 2.201634 | 1.235989 | -2.762   |
| 40 | H | -6.1458  | -1.92348 | 0.595233 |
| 41 | H | -5.27191 | -4.10401 | -0.19959 |
| 42 | H | -3.00532 | -4.2738  | -1.16438 |
| 43 | H | -1.54363 | -2.27502 | -1.34515 |

|    |   |          |          |          |
|----|---|----------|----------|----------|
| 44 | H | -2.2244  | 3.055301 | -0.0255  |
| 45 | H | -4.11435 | 4.341992 | 0.950574 |
| 46 | H | -6.22019 | 3.217718 | 1.580223 |
| 47 | H | -6.49681 | 0.775606 | 1.250579 |
| 48 | H | 6.666604 | 0.494949 | 1.001672 |
| 49 | H | 6.72761  | 2.964039 | 0.772983 |
| 50 | H | 4.748575 | 4.199969 | -0.03554 |
| 51 | H | 2.660201 | 3.005854 | -0.64446 |
| 52 | H | 1.21277  | -2.35654 | -0.62994 |
| 53 | H | 2.419668 | -4.43326 | -0.02637 |
| 54 | H | 4.750965 | -4.35903 | 0.784657 |
| 55 | H | 5.943605 | -2.19445 | 0.998723 |

### 2CzOCF<sub>3</sub>

| Tag | Symbol | X        | Y        | Z        |
|-----|--------|----------|----------|----------|
| 1   | C      | -1.28014 | -0.02927 | -1.40176 |
| 2   | C      | -1.24653 | -0.05908 | -2.79466 |
| 3   | C      | -0.03138 | -0.13085 | -3.46556 |
| 4   | C      | 1.155802 | -0.19941 | -2.74742 |
| 5   | C      | 1.14124  | -0.1895  | -1.35276 |
| 6   | C      | -0.08191 | -0.08166 | -0.68244 |
| 7   | N      | -2.51024 | 0.041372 | -0.72155 |
| 8   | N      | 2.337648 | -0.30235 | -0.62598 |
| 9   | O      | -0.15455 | -0.11467 | 0.689521 |
| 10  | C      | -3.01975 | 1.156217 | -0.06824 |
| 11  | C      | -4.25618 | 0.809899 | 0.522539 |
| 12  | C      | -4.49259 | -0.58168 | 0.211609 |
| 13  | C      | -3.39025 | -1.0206  | -0.55685 |
| 14  | C      | 2.695087 | -1.38273 | 0.176981 |

|    |   |          |          |          |
|----|---|----------|----------|----------|
| 15 | C | 4.004249 | -1.17187 | 0.661965 |
| 16 | C | 4.453787 | 0.091253 | 0.121328 |
| 17 | C | 3.399505 | 0.595536 | -0.67229 |
| 18 | C | -5.51631 | -1.48223 | 0.508787 |
| 19 | C | -5.42259 | -2.78712 | 0.04359  |
| 20 | C | -4.31752 | -3.20178 | -0.71256 |
| 21 | C | -3.28392 | -2.32705 | -1.02403 |
| 22 | C | -2.48962 | 2.439596 | 0.018751 |
| 23 | C | -3.21885 | 3.383685 | 0.729949 |
| 24 | C | -4.44427 | 3.061315 | 1.329288 |
| 25 | C | -4.96899 | 1.780009 | 1.228533 |
| 26 | C | 5.630293 | 0.831528 | 0.241807 |
| 27 | C | 5.733231 | 2.046603 | -0.42218 |
| 28 | C | 4.672031 | 2.531271 | -1.19869 |
| 29 | C | 3.488572 | 1.81594  | -1.33459 |
| 30 | C | 1.960867 | -2.52029 | 0.494406 |
| 31 | C | 2.563499 | -3.45634 | 1.325173 |
| 32 | C | 3.859924 | -3.2656  | 1.822478 |
| 33 | C | 4.585619 | -2.12851 | 1.495073 |
| 34 | C | 0.360135 | 0.909559 | 1.43222  |
| 35 | F | -0.55427 | 1.296241 | 2.311239 |
| 36 | F | 0.702628 | 1.95839  | 0.677909 |
| 37 | F | 1.433104 | 0.512739 | 2.10772  |
| 38 | H | -2.18772 | -0.0135  | -3.33239 |
| 39 | H | -0.0099  | -0.14711 | -4.55009 |
| 40 | H | 2.113673 | -0.28125 | -3.25074 |
| 41 | H | -6.372   | -1.16585 | 1.098213 |
| 42 | H | -6.21204 | -3.49726 | 0.268604 |
| 43 | H | -4.26545 | -4.22856 | -1.06206 |

|    |   |          |          |          |
|----|---|----------|----------|----------|
| 44 | H | -2.42671 | -2.64723 | -1.60793 |
| 45 | H | -1.53869 | 2.688683 | -0.43977 |
| 46 | H | -2.82885 | 4.392795 | 0.822268 |
| 47 | H | -4.98731 | 3.824411 | 1.87785  |
| 48 | H | -5.92058 | 1.534281 | 1.690937 |
| 49 | H | 6.451651 | 0.462292 | 0.848977 |
| 50 | H | 6.643351 | 2.631866 | -0.33686 |
| 51 | H | 4.772587 | 3.487865 | -1.7025  |
| 52 | H | 2.661777 | 2.196773 | -1.92536 |
| 53 | H | 0.954548 | -2.66703 | 0.116576 |
| 54 | H | 2.014728 | -4.35327 | 1.595746 |
| 55 | H | 4.298839 | -4.01693 | 2.471326 |
| 56 | H | 5.591224 | -1.98416 | 1.879189 |

### 2CzSCF<sub>3</sub>

| Tag | Symbol | X        | Y        | Z        |
|-----|--------|----------|----------|----------|
| 1   | C      | -0.17157 | -0.75934 | -3.31815 |
| 2   | C      | -1.36612 | -0.57584 | -2.63514 |
| 3   | C      | -1.36118 | -0.32698 | -1.26354 |
| 4   | C      | -0.14822 | -0.277   | -0.55301 |
| 5   | C      | 1.053769 | -0.48972 | -1.25257 |
| 6   | C      | 1.032832 | -0.71202 | -2.62878 |
| 7   | N      | -2.59348 | -0.1296  | -0.60863 |
| 8   | N      | 2.295615 | -0.47606 | -0.59039 |
| 9   | C      | -3.08514 | 1.083212 | -0.13779 |
| 10  | C      | -4.38527 | 0.876361 | 0.374745 |
| 11  | C      | -4.6885  | -0.52554 | 0.196215 |
| 12  | C      | -3.56011 | -1.11086 | -0.42215 |
| 13  | C      | 2.760517 | -1.44837 | 0.292228 |

|    |   |          |          |          |
|----|---|----------|----------|----------|
| 14 | C | 4.098991 | -1.15034 | 0.629748 |
| 15 | C | 4.460242 | 0.044209 | -0.09899 |
| 16 | C | 3.327016 | 0.421893 | -0.85215 |
| 17 | C | 2.106511 | -2.57137 | 0.788637 |
| 18 | C | 2.814004 | -3.3912  | 1.658443 |
| 19 | C | 4.137412 | -3.10423 | 2.019942 |
| 20 | C | 4.786299 | -1.9893  | 1.507864 |
| 21 | C | 5.620642 | 0.814663 | -0.17824 |
| 22 | C | 5.631255 | 1.933951 | -0.99964 |
| 23 | C | 4.493893 | 2.293236 | -1.73545 |
| 24 | C | 3.323972 | 1.546594 | -1.67135 |
| 25 | C | -2.479   | 2.33557  | -0.13768 |
| 26 | C | -3.20147 | 3.392927 | 0.400173 |
| 27 | C | -4.49109 | 3.210113 | 0.918338 |
| 28 | C | -5.08859 | 1.957407 | 0.908261 |
| 29 | C | -5.79048 | -1.32578 | 0.499503 |
| 30 | C | -5.74949 | -2.67774 | 0.185038 |
| 31 | C | -4.61953 | -3.23787 | -0.4261  |
| 32 | C | -3.50709 | -2.46548 | -0.73777 |
| 33 | S | -0.21228 | -0.03839 | 1.200767 |
| 34 | C | 0.778141 | 1.480441 | 1.396715 |
| 35 | F | 0.186891 | 2.236828 | 2.323081 |
| 36 | F | 0.860228 | 2.18658  | 0.264787 |
| 37 | F | 2.017746 | 1.236374 | 1.817166 |
| 38 | H | -0.17857 | -0.9441  | -4.38739 |
| 39 | H | -2.32085 | -0.60285 | -3.14989 |
| 40 | H | 1.978566 | -0.86542 | -3.13824 |
| 41 | H | 1.082763 | -2.79643 | 0.509601 |
| 42 | H | 2.328173 | -4.27237 | 2.066313 |



|    |   |          |          |          |
|----|---|----------|----------|----------|
| 43 | H | 4.659376 | -3.7649  | 2.704943 |
| 44 | H | 5.815396 | -1.77406 | 1.7804   |
| 45 | H | 6.501084 | 0.541913 | 0.396266 |
| 46 | H | 6.527883 | 2.541433 | -1.07168 |
| 47 | H | 4.523415 | 3.176658 | -2.36613 |
| 48 | H | 2.438153 | 1.833941 | -2.22794 |
| 49 | H | -1.4781  | 2.477977 | -0.52938 |
| 50 | H | -2.75331 | 4.381698 | 0.420585 |
| 51 | H | -5.02584 | 4.059237 | 1.332057 |
| 52 | H | -6.089   | 1.818366 | 1.307711 |
| 53 | H | -6.66638 | -0.89597 | 0.976727 |
| 54 | H | -6.6006  | -3.31061 | 0.415756 |
| 55 | H | -4.60963 | -4.29823 | -0.65982 |
| 56 | H | -2.63083 | -2.90006 | -1.20835 |

**2CzSF<sub>5</sub>**

| Tag | Symbol | X        | Y        | Z        |
|-----|--------|----------|----------|----------|
| 1   | C      | 1.210817 | -0.00035 | -1.06858 |
| 2   | C      | 1.192297 | -0.00178 | -2.46399 |
| 3   | C      | 3.85E-05 | -0.00268 | -3.16818 |
| 4   | C      | -1.19229 | -0.00204 | -2.46409 |
| 5   | C      | -1.21083 | -0.00079 | -1.0687  |
| 6   | C      | -4.4E-05 | -0.00019 | -0.34992 |
| 7   | N      | 2.49288  | 0.000234 | -0.47046 |
| 8   | N      | -2.49291 | -0.00015 | -0.47055 |
| 9   | C      | 3.294926 | -1.1306  | -0.34691 |
| 10  | C      | 4.618501 | -0.72274 | -0.0697  |
| 11  | C      | 4.618496 | 0.723088 | -0.06975 |
| 12  | C      | 3.29491  | 1.131014 | -0.34686 |

|    |   |          |          |          |
|----|---|----------|----------|----------|
| 13 | C | -3.29453 | 1.130982 | -0.34716 |
| 14 | C | -4.61824 | 0.72364  | -0.06976 |
| 15 | C | -4.61878 | -0.7222  | -0.06954 |
| 16 | C | -3.29538 | -1.13061 | -0.34682 |
| 17 | C | 5.605254 | 1.691854 | 0.117196 |
| 18 | C | 5.260933 | 3.032746 | 0.01169  |
| 19 | C | 3.94363  | 3.414497 | -0.27679 |
| 20 | C | 2.940057 | 2.471176 | -0.45872 |
| 21 | C | 2.939876 | -2.47075 | -0.45834 |
| 22 | C | 3.94347  | -3.41412 | -0.27672 |
| 23 | C | 5.260905 | -3.03241 | 0.011199 |
| 24 | C | 5.605338 | -1.69154 | 0.116637 |
| 25 | C | -5.60582 | -1.69062 | 0.117651 |
| 26 | C | -5.2619  | -3.03165 | 0.012485 |
| 27 | C | -3.94473 | -3.41389 | -0.27589 |
| 28 | C | -2.94088 | -2.47092 | -0.45813 |
| 29 | C | -2.93916 | 2.470977 | -0.45943 |
| 30 | C | -3.9424  | 3.414742 | -0.27792 |
| 31 | C | -5.25986 | 3.033564 | 0.010559 |
| 32 | C | -5.60469 | 1.692837 | 0.116533 |
| 33 | S | -6.2E-06 | -9.3E-05 | 1.482244 |
| 34 | F | 0.00019  | -0.00014 | 3.089549 |
| 35 | F | 1.12867  | 1.143526 | 1.541219 |
| 36 | F | -1.12905 | 1.143169 | 1.541239 |
| 37 | F | -1.12868 | -1.14369 | 1.541372 |
| 38 | F | 1.128955 | -1.14343 | 1.541046 |
| 39 | H | 2.150084 | -0.00226 | -2.97386 |
| 40 | H | 0.000146 | -0.00376 | -4.25307 |
| 41 | H | -2.15007 | -0.0023  | -2.97397 |

|    |   |          |          |          |
|----|---|----------|----------|----------|
| 42 | H | 6.628033 | 1.399296 | 0.336176 |
| 43 | H | 6.019186 | 3.796412 | 0.153168 |
| 44 | H | 3.69892  | 4.469426 | -0.35539 |
| 45 | H | 1.9178   | 2.766322 | -0.67099 |
| 46 | H | 1.917536 | -2.76584 | -0.6703  |
| 47 | H | 3.698661 | -4.46905 | -0.35498 |
| 48 | H | 6.01922  | -3.79611 | 0.152182 |
| 49 | H | 6.628181 | -1.39906 | 0.335429 |
| 50 | H | -6.6285  | -1.39773 | 0.336676 |
| 51 | H | -6.0204  | -3.79504 | 0.15416  |
| 52 | H | -3.70035 | -4.46893 | -0.35408 |
| 53 | H | -1.91871 | -2.7664  | -0.67034 |
| 54 | H | -1.91683 | 2.765649 | -0.67197 |
| 55 | H | -3.69731 | 4.469562 | -0.3568  |
| 56 | H | -6.01789 | 3.797543 | 0.151529 |
| 57 | H | -6.62761 | 1.400791 | 0.335532 |

## 2CzBN

| Tag | Symbol | X        | Y        | Z        |
|-----|--------|----------|----------|----------|
| 1   | C      | 1.215618 | -0.06383 | -1.08122 |
| 2   | C      | 1.20511  | -0.05605 | -2.47419 |
| 3   | C      | -2E-07   | -4.1E-05 | -3.16348 |
| 4   | C      | -1.20511 | 0.055978 | -2.47419 |
| 5   | C      | -1.21562 | 0.063788 | -1.08122 |
| 6   | C      | -2E-06   | -1.4E-05 | -0.37199 |
| 7   | N      | 2.437256 | -0.1396  | -0.3954  |
| 8   | N      | -2.43726 | 0.139581 | -0.3954  |
| 9   | C      | 2.858355 | -1.18707 | 0.426476 |
| 10  | C      | 4.192495 | -0.9436  | 0.818849 |

|    |   |          |          |          |
|----|---|----------|----------|----------|
| 11 | C | 4.595561 | 0.297782 | 0.198098 |
| 12 | C | 3.49177  | 0.757942 | -0.55301 |
| 13 | C | 2.174246 | -2.33553 | 0.811988 |
| 14 | C | 2.845964 | -3.23555 | 1.628948 |
| 15 | C | 4.164086 | -3.00433 | 2.044021 |
| 16 | C | 4.844148 | -1.86419 | 1.640462 |
| 17 | C | 5.771811 | 1.04796  | 0.213345 |
| 18 | C | 5.826987 | 2.230169 | -0.51258 |
| 19 | C | 4.718055 | 2.672803 | -1.24553 |
| 20 | C | 3.532957 | 1.947447 | -1.27449 |
| 21 | C | -2.85835 | 1.187072 | 0.426458 |
| 22 | C | -4.19249 | 0.943613 | 0.818835 |
| 23 | C | -4.59556 | -0.29777 | 0.198107 |
| 24 | C | -3.49178 | -0.75796 | -0.55299 |
| 25 | C | -2.17423 | 2.335527 | 0.811953 |
| 26 | C | -2.84593 | 3.23557  | 1.628899 |
| 27 | C | -4.16406 | 3.004368 | 2.043975 |
| 28 | C | -4.84413 | 1.86422  | 1.640434 |
| 29 | C | -5.77182 | -1.04794 | 0.213367 |
| 30 | C | -5.82701 | -2.23016 | -0.51254 |
| 31 | C | -4.71808 | -2.67282 | -1.24548 |
| 32 | C | -3.53298 | -1.94747 | -1.27445 |
| 33 | C | -6.1E-06 | 1.9E-06  | 1.055087 |
| 34 | N | -1.6E-05 | 0.000104 | 2.215987 |
| 35 | H | 2.151474 | -0.11298 | -3.00111 |
| 36 | H | 5E-07    | -5.2E-05 | -4.24876 |
| 37 | H | -2.15148 | 0.112906 | -3.00111 |
| 38 | H | 1.154019 | -2.52306 | 0.495334 |
| 39 | H | 2.333884 | -4.13614 | 1.953233 |

|    |   |          |          |          |
|----|---|----------|----------|----------|
| 40 | H | 4.656833 | -3.72778 | 2.685735 |
| 41 | H | 5.869572 | -1.69084 | 1.953369 |
| 42 | H | 6.629883 | 0.711224 | 0.787625 |
| 43 | H | 6.736719 | 2.822176 | -0.51025 |
| 44 | H | 4.781234 | 3.604349 | -1.79972 |
| 45 | H | 2.672026 | 2.298821 | -1.83385 |
| 46 | H | -1.154   | 2.523041 | 0.495294 |
| 47 | H | -2.33385 | 4.136154 | 1.953169 |
| 48 | H | -4.6568  | 3.72783  | 2.685677 |
| 49 | H | -5.86956 | 1.690894 | 1.953345 |
| 50 | H | -6.62989 | -0.71119 | 0.787642 |
| 51 | H | -6.73675 | -2.82216 | -0.51019 |
| 52 | H | -4.78127 | -3.60437 | -1.79965 |
| 53 | H | -2.67205 | -2.29887 | -1.8338  |

## 2CzTRZ

| Tag | Symbol | X        | Y        | Z        |
|-----|--------|----------|----------|----------|
| 1   | C      | -1.11246 | -2.62873 | -0.46841 |
| 2   | C      | -1.11021 | -4.02166 | -0.46932 |
| 3   | C      | -0.00085 | -4.7153  | 0.000913 |
| 4   | C      | 1.108892 | -4.02202 | 0.470772 |
| 5   | C      | 1.111933 | -2.62909 | 0.469109 |
| 6   | C      | -5.6E-05 | -1.91537 | 0.000163 |
| 7   | N      | -2.2319  | -1.93422 | -0.97723 |
| 8   | N      | 2.231762 | -1.93503 | 0.97787  |
| 9   | C      | -2.18899 | -1.01801 | -2.02359 |
| 10  | C      | -3.40309 | -0.29697 | -2.05213 |
| 11  | C      | -4.20234 | -0.78507 | -0.95202 |
| 12  | C      | -3.43482 | -1.77658 | -0.29895 |

|    |   |          |          |          |
|----|---|----------|----------|----------|
| 13 | C | -1.16365 | -0.77691 | -2.93385 |
| 14 | C | -1.37337 | 0.215788 | -3.88282 |
| 15 | C | -2.57283 | 0.939574 | -3.93128 |
| 16 | C | -3.59143 | 0.687886 | -3.02246 |
| 17 | C | -5.45466 | -0.44257 | -0.44231 |
| 18 | C | -5.91061 | -1.07528 | 0.706971 |
| 19 | C | -5.12501 | -2.04095 | 1.35204  |
| 20 | C | -3.87713 | -2.40654 | 0.860357 |
| 21 | C | 2.188923 | -1.0182  | 2.02373  |
| 22 | C | 3.402854 | -0.29687 | 2.051584 |
| 23 | C | 4.201925 | -0.78535 | 0.951495 |
| 24 | C | 3.434409 | -1.77726 | 0.299056 |
| 25 | C | 1.163766 | -0.77686 | 2.934127 |
| 26 | C | 1.373482 | 0.216407 | 3.882499 |
| 27 | C | 2.572773 | 0.940501 | 3.930268 |
| 28 | C | 3.591218 | 0.688559 | 3.021322 |
| 29 | C | 5.454171 | -0.44304 | 0.441472 |
| 30 | C | 5.909989 | -1.07628 | -0.70757 |
| 31 | C | 5.124351 | -2.0423  | -1.35206 |
| 32 | C | 3.876584 | -2.40778 | -0.85998 |
| 33 | C | 0.000163 | -0.42972 | 0.000117 |
| 34 | N | -1.03879 | 0.173681 | 0.566614 |
| 35 | C | -1.01135 | 1.512191 | 0.511125 |
| 36 | N | 0.000541 | 2.219502 | 0.000361 |
| 37 | C | 1.012174 | 1.511992 | -0.51064 |
| 38 | N | 1.039237 | 0.173472 | -0.56635 |
| 39 | C | 2.17684  | 2.235269 | -1.04864 |
| 40 | C | -2.17602 | 2.235656 | 1.048877 |
| 41 | C | 2.203114 | 3.63364  | -1.04545 |

|    |   |          |          |          |
|----|---|----------|----------|----------|
| 42 | C | 3.312589 | 4.309073 | -1.53533 |
| 43 | C | 4.403696 | 3.594754 | -2.02786 |
| 44 | C | 4.380932 | 2.201982 | -2.03159 |
| 45 | C | 3.271934 | 1.52127  | -1.54735 |
| 46 | C | -3.27147 | 1.521826 | 1.54706  |
| 47 | C | -4.38052 | 2.202709 | 2.030931 |
| 48 | C | -4.40299 | 3.595488 | 2.027353 |
| 49 | C | -3.31154 | 4.309638 | 1.535353 |
| 50 | C | -2.20201 | 3.634031 | 1.045819 |
| 51 | H | -1.97821 | -4.54368 | -0.85836 |
| 52 | H | -0.00116 | -5.80055 | 0.001217 |
| 53 | H | 1.97659  | -4.54429 | 0.860138 |
| 54 | H | -0.22812 | -1.32457 | -2.88845 |
| 55 | H | -0.58682 | 0.436741 | -4.59783 |
| 56 | H | -2.70126 | 1.709879 | -4.68513 |
| 57 | H | -4.51656 | 1.255736 | -3.05646 |
| 58 | H | -6.05419 | 0.322117 | -0.92713 |
| 59 | H | -6.88236 | -0.81638 | 1.115983 |
| 60 | H | -5.49601 | -2.51355 | 2.256598 |
| 61 | H | -3.26359 | -3.14416 | 1.36732  |
| 62 | H | 0.228346 | -1.32475 | 2.88924  |
| 63 | H | 0.58705  | 0.437571 | 4.597574 |
| 64 | H | 2.701198 | 1.71126  | 4.683646 |
| 65 | H | 4.516215 | 1.25665  | 3.054768 |
| 66 | H | 6.053721 | 0.32191  | 0.925846 |
| 67 | H | 6.881656 | -0.81752 | -1.11685 |
| 68 | H | 5.495242 | -2.51531 | -2.25645 |
| 69 | H | 3.26305  | -3.14574 | -1.36646 |
| 70 | H | 1.345864 | 4.169637 | -0.65311 |

|    |   |          |          |          |
|----|---|----------|----------|----------|
| 71 | H | 3.329648 | 5.394875 | -1.53217 |
| 72 | H | 5.272531 | 4.125446 | -2.40702 |
| 73 | H | 5.231208 | 1.638913 | -2.40382 |
| 74 | H | 3.244341 | 0.437396 | -1.5388  |
| 75 | H | -3.24412 | 0.437947 | 1.538381 |
| 76 | H | -5.23107 | 1.639772 | 2.402745 |
| 77 | H | -5.27187 | 4.126312 | 2.406226 |
| 78 | H | -3.32838 | 5.395443 | 1.532293 |
| 79 | H | -1.34451 | 4.169897 | 0.653853 |

### 2CzBP

| Tag | Symbol | X        | Y        | Z        |
|-----|--------|----------|----------|----------|
| 1   | C      | 0.812638 | -1.31853 | -1.19847 |
| 2   | C      | 0.699743 | -2.09677 | -2.35105 |
| 3   | C      | -0.53048 | -2.23804 | -2.97817 |
| 4   | C      | -1.65446 | -1.61341 | -2.4506  |
| 5   | C      | -1.55078 | -0.85091 | -1.28946 |
| 6   | C      | -0.31099 | -0.67742 | -0.65205 |
| 7   | N      | 2.080504 | -1.1985  | -0.58842 |
| 8   | N      | -2.71325 | -0.2417  | -0.7747  |
| 9   | C      | -0.24253 | 0.075597 | 0.657059 |
| 10  | C      | 0.743893 | 1.17134  | 0.814368 |
| 11  | C      | 1.070602 | 1.57384  | 2.113073 |
| 12  | C      | 2.013228 | 2.5705   | 2.313589 |
| 13  | C      | 2.628792 | 3.178722 | 1.219506 |
| 14  | C      | 2.297415 | 2.792354 | -0.07581 |
| 15  | C      | 1.357803 | 1.789174 | -0.27729 |
| 16  | O      | -0.97965 | -0.26475 | 1.563757 |
| 17  | C      | 2.388686 | -1.49531 | 0.737289 |



|    |   |          |          |          |
|----|---|----------|----------|----------|
| 18 | C | 3.692201 | -1.02779 | 1.016811 |
| 19 | C | 4.188766 | -0.42097 | -0.19573 |
| 20 | C | 3.167788 | -0.5485  | -1.1642  |
| 21 | C | 1.62031  | -2.15418 | 1.69351  |
| 22 | C | 2.173159 | -2.30997 | 2.957892 |
| 23 | C | 3.459524 | -1.84122 | 3.259352 |
| 24 | C | 4.226242 | -1.20519 | 2.293494 |
| 25 | C | 5.370915 | 0.239595 | -0.53035 |
| 26 | C | 5.512992 | 0.763541 | -1.80813 |
| 27 | C | 4.486022 | 0.633213 | -2.75312 |
| 28 | C | 3.300012 | -0.02299 | -2.44729 |
| 29 | C | -2.91744 | 1.122091 | -0.61041 |
| 30 | C | -4.14245 | 1.321992 | 0.065658 |
| 31 | C | -4.69301 | 0.011976 | 0.325929 |
| 32 | C | -3.77668 | -0.92709 | -0.19881 |
| 33 | C | -2.1275  | 2.186603 | -1.03393 |
| 34 | C | -2.57236 | 3.470679 | -0.74597 |
| 35 | C | -3.77852 | 3.689886 | -0.06776 |
| 36 | C | -4.5699  | 2.622273 | 0.334958 |
| 37 | C | -5.8535  | -0.44204 | 0.953515 |
| 38 | C | -6.07532 | -1.80877 | 1.052347 |
| 39 | C | -5.14713 | -2.72362 | 0.536324 |
| 40 | C | -3.98459 | -2.29911 | -0.09454 |
| 41 | H | 1.585184 | -2.59666 | -2.72977 |
| 42 | H | -0.61547 | -2.84013 | -3.87709 |
| 43 | H | -2.62452 | -1.70212 | -2.92844 |
| 44 | H | 0.583887 | 1.073276 | 2.943386 |
| 45 | H | 2.278067 | 2.871146 | 3.322666 |
| 46 | H | 3.373613 | 3.95308  | 1.378682 |

|    |   |          |          |          |
|----|---|----------|----------|----------|
| 47 | H | 2.784887 | 3.254121 | -0.92843 |
| 48 | H | 1.109911 | 1.477281 | -1.28703 |
| 49 | H | 0.619485 | -2.50807 | 1.472134 |
| 50 | H | 1.591623 | -2.80742 | 3.727919 |
| 51 | H | 3.8584   | -1.98164 | 4.259067 |
| 52 | H | 5.225275 | -0.84786 | 2.52547  |
| 53 | H | 6.163633 | 0.35046  | 0.203751 |
| 54 | H | 6.427411 | 1.281138 | -2.08052 |
| 55 | H | 4.617369 | 1.05276  | -3.74609 |
| 56 | H | 2.503244 | -0.1153  | -3.17846 |
| 57 | H | -1.1988  | 2.022924 | -1.56878 |
| 58 | H | -1.96999 | 4.3195   | -1.05505 |
| 59 | H | -4.09679 | 4.706257 | 0.141821 |
| 60 | H | -5.50791 | 2.794777 | 0.85471  |
| 61 | H | -6.56886 | 0.265492 | 1.362727 |
| 62 | H | -6.97352 | -2.17578 | 1.538973 |
| 63 | H | -5.33689 | -3.78836 | 0.634159 |
| 64 | H | -3.26148 | -3.00859 | -0.48325 |

### 5CzCF<sub>3</sub>

| Tag | Symbol | X        | Y        | Z        |
|-----|--------|----------|----------|----------|
| 1   | C      | -1.21688 | -1.38712 | -0.21391 |
| 2   | C      | -1.23115 | 0.026502 | -0.14505 |
| 3   | C      | -0.0229  | 0.744295 | -0.05953 |
| 4   | C      | 1.204162 | 0.052662 | -0.06828 |
| 5   | C      | 1.215314 | -1.35139 | -0.18308 |
| 6   | C      | 0.009743 | -2.0717  | -0.25181 |
| 7   | N      | -2.45173 | -2.0599  | -0.25107 |
| 8   | N      | -2.44018 | 0.733246 | -0.20976 |

|    |   |          |          |          |
|----|---|----------|----------|----------|
| 9  | N | -0.03832 | 2.139137 | 0.063337 |
| 10 | N | 2.391003 | 0.763692 | 0.172981 |
| 11 | N | 2.456203 | -2.02628 | -0.12743 |
| 12 | C | -3.00834 | -2.78648 | 0.803221 |
| 13 | C | -4.36088 | -3.05365 | 0.504637 |
| 14 | C | -4.62885 | -2.47711 | -0.79329 |
| 15 | C | -3.42899 | -1.87745 | -1.23036 |
| 16 | C | -5.76052 | -2.41291 | -1.60591 |
| 17 | C | -5.67435 | -1.75997 | -2.82814 |
| 18 | C | -4.46744 | -1.18933 | -3.25227 |
| 19 | C | -3.32443 | -1.24955 | -2.46567 |
| 20 | C | -2.42323 | -3.18657 | 2.000169 |
| 21 | C | -3.22821 | -3.85532 | 2.914601 |
| 22 | C | -4.57616 | -4.12221 | 2.641626 |
| 23 | C | -5.1463  | -3.72863 | 1.438294 |
| 24 | C | -2.78826 | 1.589669 | -1.26008 |
| 25 | C | -4.11609 | 2.023742 | -1.07116 |
| 26 | C | -4.59116 | 1.409713 | 0.147011 |
| 27 | C | -3.53485 | 0.624307 | 0.653832 |
| 28 | C | -2.04704 | 1.960387 | -2.37554 |
| 29 | C | -2.64827 | 2.81025  | -3.29559 |
| 30 | C | -3.96036 | 3.265318 | -3.1173  |
| 31 | C | -4.70131 | 2.871071 | -2.01124 |
| 32 | C | -5.79499 | 1.478127 | 0.847338 |
| 33 | C | -5.92321 | 0.777331 | 2.038884 |
| 34 | C | -4.85287 | 0.029809 | 2.544162 |
| 35 | C | -3.64312 | -0.04724 | 1.866031 |
| 36 | C | -0.69664 | 2.868787 | 1.060142 |
| 37 | C | -0.49394 | 4.244073 | 0.82448  |

|    |   |          |          |          |
|----|---|----------|----------|----------|
| 38 | C | 0.316156 | 4.354195 | -0.36676 |
| 39 | C | 0.582637 | 3.04168  | -0.80709 |
| 40 | C | -1.39949 | 2.415398 | 2.169455 |
| 41 | C | -1.94006 | 3.364883 | 3.027073 |
| 42 | C | -1.76759 | 4.734775 | 2.796907 |
| 43 | C | -1.03855 | 5.180407 | 1.702768 |
| 44 | C | 0.80921  | 5.437105 | -1.09385 |
| 45 | C | 1.549107 | 5.196673 | -2.24372 |
| 46 | C | 1.785443 | 3.886822 | -2.67732 |
| 47 | C | 1.298578 | 2.794127 | -1.97131 |
| 48 | C | 3.272635 | -2.00075 | 1.00668  |
| 49 | C | 4.585084 | -2.3584  | 0.637841 |
| 50 | C | 4.564295 | -2.61116 | -0.78513 |
| 51 | C | 3.240798 | -2.39724 | -1.22469 |
| 52 | C | 3.525645 | 0.830329 | -0.64092 |
| 53 | C | 4.575929 | 1.422471 | 0.090833 |
| 54 | C | 4.05525  | 1.732791 | 1.401946 |
| 55 | C | 2.706424 | 1.323081 | 1.417228 |
| 56 | C | 2.927294 | -1.70093 | 2.318274 |
| 57 | C | 3.939079 | -1.72922 | 3.269206 |
| 58 | C | 5.253146 | -2.06859 | 2.922265 |
| 59 | C | 5.582298 | -2.39261 | 1.612957 |
| 60 | C | 5.546285 | -2.96159 | -1.71148 |
| 61 | C | 5.197587 | -3.09109 | -3.04866 |
| 62 | C | 3.87575  | -2.88384 | -3.46458 |
| 63 | C | 2.879569 | -2.53817 | -2.56071 |
| 64 | C | 4.615238 | 2.292533 | 2.549907 |
| 65 | C | 3.82725  | 2.434923 | 3.683798 |
| 66 | C | 2.490461 | 2.01774  | 3.680257 |

|    |   |          |          |          |
|----|---|----------|----------|----------|
| 67 | C | 1.913669 | 1.450869 | 2.551135 |
| 68 | C | 3.680812 | 0.468929 | -1.97381 |
| 69 | C | 4.926295 | 0.657159 | -2.55752 |
| 70 | C | 5.988963 | 1.215382 | -1.83633 |
| 71 | C | 5.817701 | 1.609723 | -0.5169  |
| 72 | C | 0.111039 | -3.59109 | -0.25903 |
| 73 | F | 0.952911 | -4.02856 | -1.20123 |
| 74 | F | -1.04386 | -4.21521 | -0.4806  |
| 75 | F | 0.578921 | -4.01146 | 0.930711 |
| 76 | H | -6.6941  | -2.86442 | -1.28368 |
| 77 | H | -6.54955 | -1.69395 | -3.46673 |
| 78 | H | -4.42016 | -0.68359 | -4.21155 |
| 79 | H | -2.39292 | -0.80632 | -2.79969 |
| 80 | H | -1.37624 | -2.99666 | 2.212087 |
| 81 | H | -2.79797 | -4.18206 | 3.85641  |
| 82 | H | -5.17675 | -4.64795 | 3.377137 |
| 83 | H | -6.19199 | -3.93336 | 1.228571 |
| 84 | H | -1.03341 | 1.609745 | -2.52918 |
| 85 | H | -2.0816  | 3.128533 | -4.16513 |
| 86 | H | -4.40115 | 3.9302   | -3.85337 |
| 87 | H | -5.72411 | 3.211578 | -1.87987 |
| 88 | H | -6.61697 | 2.076288 | 0.46541  |
| 89 | H | -6.85729 | 0.816254 | 2.59039  |
| 90 | H | -4.96418 | -0.50992 | 3.479245 |
| 91 | H | -2.82373 | -0.62853 | 2.271493 |
| 92 | H | -1.53878 | 1.359107 | 2.362981 |
| 93 | H | -2.51215 | 3.029816 | 3.886589 |
| 94 | H | -2.20378 | 5.452818 | 3.484059 |
| 95 | H | -0.88965 | 6.242448 | 1.53193  |

|     |   |          |          |          |
|-----|---|----------|----------|----------|
| 96  | H | 0.610962 | 6.452936 | -0.76512 |
| 97  | H | 1.944838 | 6.029976 | -2.81556 |
| 98  | H | 2.365182 | 3.713872 | -3.57866 |
| 99  | H | 1.482155 | 1.786058 | -2.32086 |
| 100 | H | 1.91002  | -1.43843 | 2.586896 |
| 101 | H | 3.704025 | -1.47566 | 4.297989 |
| 102 | H | 6.021141 | -2.08034 | 3.689192 |
| 103 | H | 6.600647 | -2.66159 | 1.348377 |
| 104 | H | 6.57113  | -3.11941 | -1.389   |
| 105 | H | 5.952653 | -3.36182 | -3.77994 |
| 106 | H | 3.62025  | -3.00018 | -4.51356 |
| 107 | H | 1.856689 | -2.38455 | -2.88728 |
| 108 | H | 5.654817 | 2.606554 | 2.554971 |
| 109 | H | 4.24881  | 2.873869 | 4.582596 |
| 110 | H | 1.886203 | 2.141169 | 4.573741 |
| 111 | H | 0.880859 | 1.124535 | 2.563549 |
| 112 | H | 2.869288 | 0.028559 | -2.53983 |
| 113 | H | 5.074101 | 0.353311 | -3.58875 |
| 114 | H | 6.952101 | 1.348249 | -2.31897 |
| 115 | H | 6.635582 | 2.060501 | 0.037372 |

### 5CzOCF<sub>3</sub>

| Tag | Symbol | X        | Y        | Z        |
|-----|--------|----------|----------|----------|
| 1   | C      | 1.2278   | -1.24247 | 0.105189 |
| 2   | C      | 1.261185 | 0.166903 | 0.072939 |
| 3   | C      | 0.058645 | 0.897865 | -0.02051 |
| 4   | C      | -1.1778  | 0.222084 | -0.03768 |
| 5   | C      | -1.2116  | -1.18569 | 0.034458 |
| 6   | C      | -0.00856 | -1.89605 | 0.072153 |

|    |   |          |          |          |
|----|---|----------|----------|----------|
| 7  | N | 2.408801 | -1.98832 | 0.22307  |
| 8  | N | 2.482022 | 0.844254 | 0.184381 |
| 9  | N | 0.095818 | 2.296888 | -0.09446 |
| 10 | N | -2.36928 | 0.948099 | -0.16345 |
| 11 | N | -2.42444 | -1.8854  | 0.073597 |
| 12 | O | 0.005811 | -3.26458 | 0.197619 |
| 13 | C | 2.973787 | -2.78381 | -0.77424 |
| 14 | C | 4.260705 | -3.18597 | -0.35687 |
| 15 | C | 4.479656 | -2.61093 | 0.950674 |
| 16 | C | 3.318594 | -1.87906 | 1.276218 |
| 17 | C | 5.540565 | -2.64818 | 1.855676 |
| 18 | C | 5.424836 | -1.9603  | 3.055915 |
| 19 | C | 4.256316 | -1.25258 | 3.366139 |
| 20 | C | 3.181961 | -1.21077 | 2.487047 |
| 21 | C | 2.469781 | -3.11755 | -2.02664 |
| 22 | C | 3.274012 | -3.88614 | -2.85958 |
| 23 | C | 4.548444 | -4.30642 | -2.45849 |
| 24 | C | 5.047483 | -3.95846 | -1.21046 |
| 25 | C | 2.827984 | 1.696651 | 1.238264 |
| 26 | C | 4.169947 | 2.097944 | 1.074676 |
| 27 | C | 4.657287 | 1.462698 | -0.12797 |
| 28 | C | 3.593423 | 0.698339 | -0.65056 |
| 29 | C | 2.074413 | 2.089265 | 2.337949 |
| 30 | C | 2.676557 | 2.931088 | 3.264757 |
| 31 | C | 4.001358 | 3.356705 | 3.109364 |
| 32 | C | 4.755218 | 2.938317 | 2.021106 |
| 33 | C | 5.878642 | 1.489371 | -0.80042 |
| 34 | C | 6.017182 | 0.764686 | -1.97662 |
| 35 | C | 4.941336 | 0.033696 | -2.49453 |

|    |   |          |          |          |
|----|---|----------|----------|----------|
| 36 | C | 3.713073 | 0.000971 | -1.84663 |
| 37 | C | 0.770795 | 3.037252 | -1.06982 |
| 38 | C | 0.575346 | 4.410133 | -0.8139  |
| 39 | C | -0.24944 | 4.505414 | 0.36869  |
| 40 | C | -0.53004 | 3.186973 | 0.783792 |
| 41 | C | 1.485611 | 2.593357 | -2.17606 |
| 42 | C | 2.042643 | 3.552602 | -3.01255 |
| 43 | C | 1.876583 | 4.920248 | -2.76346 |
| 44 | C | 1.138302 | 5.355229 | -1.67098 |
| 45 | C | -0.74675 | 5.579209 | 1.106367 |
| 46 | C | -1.50548 | 5.324428 | 2.240729 |
| 47 | C | -1.7577  | 4.008925 | 2.648175 |
| 48 | C | -1.26799 | 2.92399  | 1.932072 |
| 49 | C | -3.45291 | -1.78954 | -0.8665  |
| 50 | C | -4.60812 | -2.4021  | -0.33874 |
| 51 | C | -4.26081 | -2.89503 | 0.975745 |
| 52 | C | -2.90802 | -2.56282 | 1.196664 |
| 53 | C | -3.45172 | 0.923851 | 0.719611 |
| 54 | C | -4.50164 | 1.688772 | 0.169823 |
| 55 | C | -4.03472 | 2.196481 | -1.09986 |
| 56 | C | -2.71813 | 1.722041 | -1.2745  |
| 57 | C | -3.42433 | -1.23404 | -2.1392  |
| 58 | C | -4.60302 | -1.25837 | -2.87346 |
| 59 | C | -5.76844 | -1.84246 | -2.36074 |
| 60 | C | -5.77645 | -2.4251  | -1.10052 |
| 61 | C | -4.97379 | -3.55151 | 1.97796  |
| 62 | C | -4.33226 | -3.86029 | 3.170639 |
| 63 | C | -2.98728 | -3.52312 | 3.367755 |
| 64 | C | -2.25299 | -2.87094 | 2.383527 |



|    |   |          |          |          |
|----|---|----------|----------|----------|
| 65 | C | -4.61961 | 2.977393 | -2.09599 |
| 66 | C | -3.89064 | 3.265262 | -3.24224 |
| 67 | C | -2.59112 | 2.769677 | -3.40436 |
| 68 | C | -1.98902 | 1.985455 | -2.42794 |
| 69 | C | -3.55228 | 0.336969 | 1.97587  |
| 70 | C | -4.75128 | 0.483974 | 2.662222 |
| 71 | C | -5.81441 | 1.216684 | 2.120959 |
| 72 | C | -5.69258 | 1.829535 | 0.880777 |
| 73 | C | -0.53153 | -4.07409 | -0.76502 |
| 74 | F | 0.338992 | -5.03789 | -1.03267 |
| 75 | F | -0.79742 | -3.40742 | -1.89333 |
| 76 | F | -1.64996 | -4.64983 | -0.34342 |
| 77 | H | 6.44315  | -3.20467 | 1.621036 |
| 78 | H | 6.246248 | -1.97209 | 3.765339 |
| 79 | H | 4.18517  | -0.71981 | 4.309216 |
| 80 | H | 2.280236 | -0.66232 | 2.734666 |
| 81 | H | 1.48832  | -2.78874 | -2.34974 |
| 82 | H | 2.902322 | -4.16497 | -3.84089 |
| 83 | H | 5.150767 | -4.90681 | -3.13289 |
| 84 | H | 6.041609 | -4.27153 | -0.90538 |
| 85 | H | 1.050482 | 1.762596 | 2.473967 |
| 86 | H | 2.100198 | 3.266155 | 4.121542 |
| 87 | H | 4.44231  | 4.01636  | 3.850041 |
| 88 | H | 5.788017 | 3.254532 | 1.908445 |
| 89 | H | 6.707116 | 2.071679 | -0.40811 |
| 90 | H | 6.965245 | 0.769665 | -2.50511 |
| 91 | H | 5.062854 | -0.52631 | -3.41645 |
| 92 | H | 2.887721 | -0.56527 | -2.26117 |
| 93 | H | 1.619588 | 1.538061 | -2.38174 |

|     |   |          |          |          |
|-----|---|----------|----------|----------|
| 94  | H | 2.622714 | 3.227514 | -3.87061 |
| 95  | H | 2.326433 | 5.645363 | -3.43424 |
| 96  | H | 0.99625  | 6.415866 | -1.48589 |
| 97  | H | -0.53768 | 6.599145 | 0.797514 |
| 98  | H | -1.90435 | 6.150688 | 2.820621 |
| 99  | H | -2.35245 | 3.824989 | 3.537537 |
| 100 | H | -1.4691  | 1.91173  | 2.261396 |
| 101 | H | -2.52343 | -0.78619 | -2.54286 |
| 102 | H | -4.61628 | -0.81056 | -3.86213 |
| 103 | H | -6.67317 | -1.84408 | -2.96043 |
| 104 | H | -6.67775 | -2.88859 | -0.71049 |
| 105 | H | -6.01815 | -3.80928 | 1.828948 |
| 106 | H | -4.87608 | -4.37141 | 3.958794 |
| 107 | H | -2.50318 | -3.77968 | 4.305104 |
| 108 | H | -1.20907 | -2.61793 | 2.536926 |
| 109 | H | -5.6333  | 3.348363 | -1.97674 |
| 110 | H | -4.33164 | 3.876952 | -4.02296 |
| 111 | H | -2.0348  | 3.003354 | -4.30683 |
| 112 | H | -0.98427 | 1.604437 | -2.5671  |
| 113 | H | -2.73593 | -0.23102 | 2.406873 |
| 114 | H | -4.86009 | 0.012854 | 3.634087 |
| 115 | H | -6.73914 | 1.311801 | 2.681307 |
| 116 | H | -6.51052 | 2.41329  | 0.469045 |

### 5CzSCF<sub>3</sub>

| Tag | Symbol | X        | Y        | Z        |
|-----|--------|----------|----------|----------|
| 1   | C      | 1.200608 | -1.23394 | 0.222294 |
| 2   | C      | 1.291991 | 0.169119 | 0.11242  |
| 3   | C      | 0.118354 | 0.941274 | -0.0022  |

|    |   |          |          |          |
|----|---|----------|----------|----------|
| 4  | C | -1.14481 | 0.314304 | 0.020524 |
| 5  | C | -1.23247 | -1.08487 | 0.170086 |
| 6  | C | -0.05958 | -1.8562  | 0.246594 |
| 7  | N | 2.371141 | -2.00319 | 0.34006  |
| 8  | N | 2.538859 | 0.807107 | 0.167597 |
| 9  | N | 0.206907 | 2.332306 | -0.13539 |
| 10 | N | -2.3025  | 1.086725 | -0.14801 |
| 11 | N | -2.48964 | -1.70752 | 0.218724 |
| 12 | S | -0.10344 | -3.61157 | 0.490015 |
| 13 | C | 2.899538 | -2.83508 | -0.65022 |
| 14 | C | 4.201733 | -3.22102 | -0.26889 |
| 15 | C | 4.471392 | -2.59922 | 1.007655 |
| 16 | C | 3.322585 | -1.85699 | 1.352266 |
| 17 | C | 5.566349 | -2.60438 | 1.871536 |
| 18 | C | 5.495457 | -1.87582 | 3.05136  |
| 19 | C | 4.338013 | -1.16007 | 3.382889 |
| 20 | C | 3.230432 | -1.14975 | 2.54481  |
| 21 | C | 2.337054 | -3.23285 | -1.85863 |
| 22 | C | 3.108026 | -4.03521 | -2.69133 |
| 23 | C | 4.402039 | -4.43168 | -2.32999 |
| 24 | C | 4.953599 | -4.02903 | -1.12113 |
| 25 | C | 2.943791 | 1.673213 | 1.188792 |
| 26 | C | 4.30408  | 1.993644 | 0.998251 |
| 27 | C | 4.740425 | 1.295368 | -0.18909 |
| 28 | C | 3.628979 | 0.576427 | -0.6756  |
| 29 | C | 2.225889 | 2.143868 | 2.281791 |
| 30 | C | 2.886517 | 2.976347 | 3.17681  |
| 31 | C | 4.232051 | 3.318883 | 2.996188 |
| 32 | C | 4.94744  | 2.826629 | 1.912861 |

|    |   |          |          |          |
|----|---|----------|----------|----------|
| 33 | C | 5.952376 | 1.232386 | -0.87614 |
| 34 | C | 6.034178 | 0.465259 | -2.03055 |
| 35 | C | 4.911977 | -0.21794 | -2.51433 |
| 36 | C | 3.69244  | -0.16091 | -1.8519  |
| 37 | C | 0.908734 | 3.012894 | -1.13628 |
| 38 | C | 0.767124 | 4.40003  | -0.92677 |
| 39 | C | -0.05007 | 4.567922 | 0.253205 |
| 40 | C | -0.38055 | 3.276672 | 0.713389 |
| 41 | C | 1.598898 | 2.505294 | -2.2304  |
| 42 | C | 2.190285 | 3.413497 | -3.09953 |
| 43 | C | 2.079879 | 4.794003 | -2.89521 |
| 44 | C | 1.36286  | 5.293566 | -1.81631 |
| 45 | C | -0.5026  | 5.684568 | 0.955251 |
| 46 | C | -1.26636 | 5.498015 | 2.099564 |
| 47 | C | -1.5657  | 4.208044 | 2.553554 |
| 48 | C | -1.12    | 3.081509 | 1.873759 |
| 49 | C | -3.47528 | -1.61313 | -0.76785 |
| 50 | C | -4.68091 | -2.13553 | -0.25785 |
| 51 | C | -4.41415 | -2.56463 | 1.096332 |
| 52 | C | -3.05651 | -2.28581 | 1.358694 |
| 53 | C | -3.39326 | 1.151054 | 0.723117 |
| 54 | C | -4.41518 | 1.909938 | 0.115747 |
| 55 | C | -3.92152 | 2.324148 | -1.17752 |
| 56 | C | -2.61818 | 1.801634 | -1.30832 |
| 57 | C | -3.36744 | -1.13829 | -2.06865 |
| 58 | C | -4.51562 | -1.14507 | -2.84967 |
| 59 | C | -5.72995 | -1.63815 | -2.35525 |
| 60 | C | -5.8178  | -2.14539 | -1.06601 |
| 61 | C | -5.20755 | -3.11274 | 2.103423 |

|    |   |          |          |          |
|----|---|----------|----------|----------|
| 62 | C | -4.64214 | -3.36408 | 3.346502 |
| 63 | C | -3.2944  | -3.07107 | 3.590658 |
| 64 | C | -2.48192 | -2.52827 | 2.602072 |
| 65 | C | -4.47564 | 3.056851 | -2.22637 |
| 66 | C | -3.72939 | 3.251439 | -3.38093 |
| 67 | C | -2.44297 | 2.71091  | -3.49787 |
| 68 | C | -1.87189 | 1.973249 | -2.46807 |
| 69 | C | -3.52245 | 0.649015 | 2.012638 |
| 70 | C | -4.72381 | 0.869329 | 2.674438 |
| 71 | C | -5.76105 | 1.594428 | 2.075814 |
| 72 | C | -5.6089  | 2.127365 | 0.802628 |
| 73 | C | -1.0221  | -4.17314 | -0.98399 |
| 74 | F | -0.43346 | -5.28447 | -1.43024 |
| 75 | F | -1.0117  | -3.26853 | -1.96906 |
| 76 | F | -2.28903 | -4.47681 | -0.71734 |
| 77 | H | 6.460454 | -3.16763 | 1.621164 |
| 78 | H | 6.343816 | -1.86239 | 3.728318 |
| 79 | H | 4.301938 | -0.59561 | 4.309364 |
| 80 | H | 2.337265 | -0.5944  | 2.807777 |
| 81 | H | 1.338649 | -2.92489 | -2.14723 |
| 82 | H | 2.692611 | -4.36312 | -3.63942 |
| 83 | H | 4.976487 | -5.0605  | -3.00286 |
| 84 | H | 5.960297 | -4.32873 | -0.84517 |
| 85 | H | 1.185919 | 1.883025 | 2.437586 |
| 86 | H | 2.34033  | 3.370042 | 4.028428 |
| 87 | H | 4.719029 | 3.973069 | 3.712482 |
| 88 | H | 5.995194 | 3.079579 | 1.780167 |
| 89 | H | 6.817531 | 1.778311 | -0.5117  |
| 90 | H | 6.974079 | 0.400011 | -2.56955 |

|     |   |          |          |          |
|-----|---|----------|----------|----------|
| 91  | H | 4.989814 | -0.81165 | -3.41968 |
| 92  | H | 2.830209 | -0.69108 | -2.2386  |
| 93  | H | 1.688689 | 1.439766 | -2.40328 |
| 94  | H | 2.753001 | 3.037231 | -3.94816 |
| 95  | H | 2.555318 | 5.478185 | -3.59086 |
| 96  | H | 1.262091 | 6.364418 | -1.66649 |
| 97  | H | -0.25521 | 6.68456  | 0.611539 |
| 98  | H | -1.63126 | 6.358389 | 2.651528 |
| 99  | H | -2.16287 | 4.077074 | 3.4506   |
| 100 | H | -1.35563 | 2.089702 | 2.239803 |
| 101 | H | -2.428   | -0.76599 | -2.45982 |
| 102 | H | -4.46541 | -0.75513 | -3.86142 |
| 103 | H | -6.60905 | -1.62908 | -2.99188 |
| 104 | H | -6.75635 | -2.54066 | -0.68887 |
| 105 | H | -6.25604 | -3.32711 | 1.918899 |
| 106 | H | -5.24878 | -3.79041 | 4.139232 |
| 107 | H | -2.87115 | -3.2738  | 4.569745 |
| 108 | H | -1.44007 | -2.29776 | 2.797589 |
| 109 | H | -5.4794  | 3.462498 | -2.14085 |
| 110 | H | -4.14608 | 3.824694 | -4.20307 |
| 111 | H | -1.87213 | 2.872055 | -4.40714 |
| 112 | H | -0.87781 | 1.555521 | -2.57379 |
| 113 | H | -2.72586 | 0.089168 | 2.488285 |
| 114 | H | -4.85552 | 0.461892 | 3.671885 |
| 115 | H | -6.68884 | 1.748067 | 2.617828 |
| 116 | H | -6.40565 | 2.706978 | 0.345974 |

**5CzSF<sub>5</sub>**

| Tag | Symbol | X | Y | Z |
|-----|--------|---|---|---|
|-----|--------|---|---|---|

|    |   |          |          |          |
|----|---|----------|----------|----------|
| 1  | C | 1.221162 | -1.19211 | -0.04561 |
| 2  | C | 1.214804 | 0.221504 | 0.006176 |
| 3  | C | 9.4E-06  | 0.930125 | -0.00013 |
| 4  | C | -1.21491 | 0.221744 | -0.00621 |
| 5  | C | -1.22152 | -1.19188 | 0.045688 |
| 6  | C | -0.00024 | -1.89631 | 1.44E-05 |
| 7  | N | 2.483886 | -1.82454 | -0.03806 |
| 8  | N | 2.405304 | 0.93821  | 0.219863 |
| 9  | N | 0.000135 | 2.329343 | -0.00042 |
| 10 | N | -2.40527 | 0.938727 | -0.21964 |
| 11 | N | -2.48429 | -1.82421 | 0.03805  |
| 12 | S | -0.0004  | -3.74648 | 4.97E-05 |
| 13 | C | 3.251287 | -2.15545 | -1.15921 |
| 14 | C | 4.587665 | -2.35159 | -0.74995 |
| 15 | C | 4.634707 | -2.11962 | 0.67547  |
| 16 | C | 3.323721 | -1.79679 | 1.078412 |
| 17 | C | 5.654549 | -2.14301 | 1.627219 |
| 18 | C | 5.348127 | -1.84338 | 2.947694 |
| 19 | C | 4.034918 | -1.53864 | 3.3284   |
| 20 | C | 3.001086 | -1.52244 | 2.401267 |
| 21 | C | 2.869355 | -2.27746 | -2.49202 |
| 22 | C | 3.854165 | -2.5904  | -3.42009 |
| 23 | C | 5.18682  | -2.78196 | -3.03288 |
| 24 | C | 5.55791  | -2.66744 | -1.70047 |
| 25 | C | 2.705254 | 1.497255 | 1.469511 |
| 26 | C | 4.044321 | 1.934795 | 1.463497 |
| 27 | C | 4.576053 | 1.64427  | 0.153021 |
| 28 | C | 3.54317  | 1.034617 | -0.59004 |
| 29 | C | 1.904409 | 1.602235 | 2.600003 |

|    |   |          |          |          |
|----|---|----------|----------|----------|
| 30 | C | 2.462888 | 2.174762 | 3.735421 |
| 31 | C | 3.79064  | 2.61929  | 3.748014 |
| 32 | C | 4.586958 | 2.499482 | 2.617378 |
| 33 | C | 5.818357 | 1.866198 | -0.44197 |
| 34 | C | 6.010446 | 1.489067 | -1.76287 |
| 35 | C | 4.966252 | 0.912573 | -2.4962  |
| 36 | C | 3.721228 | 0.689754 | -1.92471 |
| 37 | C | 0.603144 | 3.148488 | -0.96211 |
| 38 | C | 0.382158 | 4.49657  | -0.61414 |
| 39 | C | -0.37936 | 4.497013 | 0.613277 |
| 40 | C | -0.60191 | 3.14919  | 0.961281 |
| 41 | C | 1.269783 | 2.798409 | -2.12829 |
| 42 | C | 1.752094 | 3.821537 | -2.93375 |
| 43 | C | 1.558651 | 5.165589 | -2.59422 |
| 44 | C | 0.868326 | 5.509524 | -1.44001 |
| 45 | C | -0.86447 | 5.510562 | 1.43904  |
| 46 | C | -1.5553  | 5.16747  | 2.593199 |
| 47 | C | -1.75032 | 3.823653 | 2.932748 |
| 48 | C | -1.2691  | 2.799932 | 2.127384 |
| 49 | C | -3.3241  | -1.79594 | -1.07847 |
| 50 | C | -4.63526 | -2.11814 | -0.67561 |
| 51 | C | -4.5884  | -2.35025 | 0.749793 |
| 52 | C | -3.25196 | -2.15477 | 1.159145 |
| 53 | C | -3.54297 | 1.035007 | 0.590514 |
| 54 | C | -4.57613 | 1.64444  | -0.15232 |
| 55 | C | -4.04476 | 1.934931 | -1.46296 |
| 56 | C | -2.70561 | 1.497646 | -1.46926 |
| 57 | C | -3.00125 | -1.52171 | -2.40129 |
| 58 | C | -4.03503 | -1.53738 | -3.32849 |



|    |   |          |          |          |
|----|---|----------|----------|----------|
| 59 | C | -5.34841 | -1.84149 | -2.94787 |
| 60 | C | -5.65506 | -2.14103 | -1.62742 |
| 61 | C | -5.55885 | -2.66587 | 1.700182 |
| 62 | C | -5.18789 | -2.78083 | 3.032594 |
| 63 | C | -3.85517 | -2.58994 | 3.419906 |
| 64 | C | -2.87017 | -2.27725 | 2.491955 |
| 65 | C | -4.58776 | 2.499479 | -2.61674 |
| 66 | C | -3.7917  | 2.619404 | -3.74755 |
| 67 | C | -2.46385 | 2.17517  | -3.73522 |
| 68 | C | -1.90501 | 1.602793 | -2.5999  |
| 69 | C | -3.72056 | 0.690315 | 1.925297 |
| 70 | C | -4.96541 | 0.913125 | 2.497154 |
| 71 | C | -6.00989 | 1.489401 | 1.764052 |
| 72 | C | -5.81827 | 1.866335 | 0.443026 |
| 73 | F | -1.16499 | -3.80244 | -1.10712 |
| 74 | F | 1.164221 | -3.80251 | 1.107203 |
| 75 | F | 1.083772 | -3.81389 | -1.17786 |
| 76 | F | -0.00049 | -5.35503 | 0.000063 |
| 77 | F | -1.0846  | -3.81369 | 1.177933 |
| 78 | H | 6.672415 | -2.38475 | 1.336011 |
| 79 | H | 6.133369 | -1.84754 | 3.697004 |
| 80 | H | 3.817555 | -1.30471 | 4.365684 |
| 81 | H | 1.984849 | -1.28687 | 2.696732 |
| 82 | H | 1.839583 | -2.13167 | -2.80005 |
| 83 | H | 3.580378 | -2.69252 | -4.46591 |
| 84 | H | 5.932474 | -3.02731 | -3.78247 |
| 85 | H | 6.591394 | -2.8104  | -1.39947 |
| 86 | H | 0.879456 | 1.251582 | 2.604936 |
| 87 | H | 1.852095 | 2.28062  | 4.626671 |

|     |   |          |          |          |
|-----|---|----------|----------|----------|
| 88  | H | 4.198539 | 3.061705 | 4.651353 |
| 89  | H | 5.61963  | 2.83521  | 2.629272 |
| 90  | H | 6.61988  | 2.331049 | 0.124414 |
| 91  | H | 6.97371  | 1.649692 | -2.23667 |
| 92  | H | 5.127695 | 0.621618 | -3.52908 |
| 93  | H | 2.93071  | 0.232133 | -2.50463 |
| 94  | H | 1.419677 | 1.762786 | -2.40389 |
| 95  | H | 2.294327 | 3.566911 | -3.83897 |
| 96  | H | 1.948615 | 5.943596 | -3.2427  |
| 97  | H | 0.704098 | 6.551629 | -1.18261 |
| 98  | H | -0.69901 | 6.552463 | 1.1816   |
| 99  | H | -1.94445 | 5.945947 | 3.241602 |
| 100 | H | -2.29293 | 3.569678 | 3.837931 |
| 101 | H | -1.42022 | 1.764517 | 2.403048 |
| 102 | H | -1.98487 | -1.28663 | -2.69668 |
| 103 | H | -3.8175  | -1.30352 | -4.36575 |
| 104 | H | -6.1336  | -1.84526 | -3.69723 |
| 105 | H | -6.67306 | -2.38227 | -1.33628 |
| 106 | H | -6.59238 | -2.80828 | 1.39909  |
| 107 | H | -5.93369 | -3.026   | 3.782089 |
| 108 | H | -3.58147 | -2.69243 | 4.465709 |
| 109 | H | -1.84036 | -2.13197 | 2.800113 |
| 110 | H | -5.6205  | 2.834995 | -2.62842 |
| 111 | H | -4.19988 | 3.061715 | -4.65082 |
| 112 | H | -1.85327 | 2.281134 | -4.6266  |
| 113 | H | -0.87997 | 1.252398 | -2.60503 |
| 114 | H | -2.92979 | 0.232807 | 2.504974 |
| 115 | H | -5.12653 | 0.622313 | 3.530128 |
| 116 | H | -6.97301 | 1.650023 | 2.238143 |

|     |   |          |          |          |
|-----|---|----------|----------|----------|
| 117 | H | -6.62003 | 2.331018 | -0.12316 |
|-----|---|----------|----------|----------|

**5CzBN**

| Tag | Symbol | X        | Y        | Z        |
|-----|--------|----------|----------|----------|
| 1   | C      | 1.222873 | 1.463748 | -0.06448 |
| 2   | C      | 1.224883 | 0.055343 | -0.06503 |
| 3   | C      | 1.49E-05 | -0.64519 | -1.9E-05 |
| 4   | C      | -1.2249  | 0.055295 | 0.064946 |
| 5   | C      | -1.22294 | 1.463687 | 0.064273 |
| 6   | C      | -4.9E-05 | 2.153317 | -0.00013 |
| 7   | N      | 2.417113 | 2.191568 | -0.13158 |
| 8   | N      | 2.429762 | -0.6502  | -0.16477 |
| 9   | N      | 4.78E-05 | -2.04414 | 4.36E-05 |
| 10  | N      | -2.42973 | -0.65032 | 0.164798 |
| 11  | N      | -2.41721 | 2.191506 | 0.131364 |
| 12  | C      | 2.941809 | 2.975164 | 0.904687 |
| 13  | C      | 4.274471 | 3.308803 | 0.585371 |
| 14  | C      | 4.566361 | 2.712803 | -0.69891 |
| 15  | C      | 3.401941 | 2.033882 | -1.11153 |
| 16  | C      | 5.69354  | 2.697348 | -1.52012 |
| 17  | C      | 5.637058 | 2.01116  | -2.72581 |
| 18  | C      | 4.462518 | 1.362083 | -3.12675 |
| 19  | C      | 3.323249 | 1.375703 | -2.33244 |
| 20  | C      | 2.355836 | 3.353496 | 2.108043 |
| 21  | C      | 3.131995 | 4.089416 | 2.995736 |
| 22  | C      | 4.454428 | 4.437016 | 2.69392  |
| 23  | C      | 5.031169 | 4.050193 | 1.491741 |
| 24  | C      | 2.782771 | -1.50269 | -1.2161  |
| 25  | C      | 4.109798 | -1.93766 | -1.0195  |

|    |   |          |          |          |
|----|---|----------|----------|----------|
| 26 | C | 4.580504 | -1.32233 | 0.200282 |
| 27 | C | 3.52169  | -0.53694 | 0.700965 |
| 28 | C | 2.050325 | -1.86694 | -2.33969 |
| 29 | C | 2.657699 | -2.71537 | -3.25731 |
| 30 | C | 3.966811 | -3.17478 | -3.0693  |
| 31 | C | 4.700375 | -2.78403 | -1.957   |
| 32 | C | 5.782216 | -1.38252 | 0.904781 |
| 33 | C | 5.905278 | -0.67058 | 2.090705 |
| 34 | C | 4.833057 | 0.080579 | 2.586466 |
| 35 | C | 3.623429 | 0.147907 | 1.906201 |
| 36 | C | 0.666318 | -2.86189 | 0.920218 |
| 37 | C | 0.421398 | -4.20973 | 0.587138 |
| 38 | C | -0.42096 | -4.20978 | -0.5871  |
| 39 | C | -0.66608 | -2.86198 | -0.92017 |
| 40 | C | 1.401536 | -2.50771 | 2.045286 |
| 41 | C | 1.932158 | -3.53307 | 2.818345 |
| 42 | C | 1.719211 | -4.87718 | 2.490325 |
| 43 | C | 0.958276 | -5.22206 | 1.381249 |
| 44 | C | -0.95764 | -5.22219 | -1.38125 |
| 45 | C | -1.71857 | -4.87741 | -2.49036 |
| 46 | C | -1.93171 | -3.53332 | -2.81837 |
| 47 | C | -1.4013  | -2.50789 | -2.04526 |
| 48 | C | -3.40195 | 2.0339   | 1.111419 |
| 49 | C | -4.56652 | 2.712516 | 0.698697 |
| 50 | C | -4.27481 | 3.308223 | -0.58576 |
| 51 | C | -2.94212 | 2.974713 | -0.90507 |
| 52 | C | -3.52172 | -0.53724 | -0.70088 |
| 53 | C | -4.58052 | -1.32248 | -0.19992 |
| 54 | C | -4.10974 | -1.93751 | 1.019978 |

|    |   |          |          |          |
|----|---|----------|----------|----------|
| 55 | C | -2.78269 | -1.50254 | 1.216377 |
| 56 | C | -3.32307 | 1.376013 | 2.332468 |
| 57 | C | -4.46229 | 1.362379 | 3.126848 |
| 58 | C | -5.63697 | 2.011155 | 2.725822 |
| 59 | C | -5.69365 | 2.697049 | 1.519974 |
| 60 | C | -5.03167 | 4.0493   | -1.49225 |
| 61 | C | -4.45506 | 4.435935 | -2.69455 |
| 62 | C | -3.13259 | 4.088475 | -2.99636 |
| 63 | C | -2.35626 | 3.352886 | -2.10854 |
| 64 | C | -4.70029 | -2.78361 | 1.957744 |
| 65 | C | -3.96667 | -3.17409 | 3.070092 |
| 66 | C | -2.65753 | -2.71468 | 3.257897 |
| 67 | C | -2.05018 | -1.86652 | 2.340006 |
| 68 | C | -3.62353 | 0.147306 | -1.90628 |
| 69 | C | -4.8332  | 0.079816 | -2.58645 |
| 70 | C | -5.90539 | -0.67121 | -2.09044 |
| 71 | C | -5.78227 | -1.38284 | -0.90434 |
| 72 | C | -9.4E-05 | 3.580712 | -0.0002  |
| 73 | N | -0.0001  | 4.74154  | -0.00025 |
| 74 | H | 6.600178 | 3.212946 | -1.21793 |
| 75 | H | 6.509837 | 1.982001 | -3.37045 |
| 76 | H | 4.436666 | 0.83356  | -4.07447 |
| 77 | H | 2.415502 | 0.87695  | -2.65244 |
| 78 | H | 1.332177 | 3.089809 | 2.351788 |
| 79 | H | 2.697405 | 4.404212 | 3.939416 |
| 80 | H | 5.031536 | 5.015582 | 3.408227 |
| 81 | H | 6.060299 | 4.310096 | 1.262383 |
| 82 | H | 1.03929  | -1.51317 | -2.50273 |
| 83 | H | 2.098062 | -3.02777 | -4.13351 |

|     |   |          |          |          |
|-----|---|----------|----------|----------|
| 84  | H | 4.412085 | -3.83846 | -3.80373 |
| 85  | H | 5.721929 | -3.12578 | -1.81935 |
| 86  | H | 6.607598 | -1.98055 | 0.530044 |
| 87  | H | 6.838445 | -0.70165 | 2.644202 |
| 88  | H | 4.942754 | 0.630007 | 3.516142 |
| 89  | H | 2.800548 | 0.73065  | 2.303581 |
| 90  | H | 1.570252 | -1.47196 | 2.314634 |
| 91  | H | 2.527264 | -3.27863 | 3.68983  |
| 92  | H | 2.148902 | -5.65517 | 3.113318 |
| 93  | H | 0.777289 | -6.26443 | 1.136314 |
| 94  | H | -0.7765  | -6.26453 | -1.13633 |
| 95  | H | -2.14811 | -5.65545 | -3.11339 |
| 96  | H | -2.52681 | -3.27896 | -3.68988 |
| 97  | H | -1.57016 | -1.47217 | -2.3146  |
| 98  | H | -2.41523 | 0.877475 | 2.652523 |
| 99  | H | -4.4363  | 0.83407  | 4.074684 |
| 100 | H | -6.5097  | 1.981995 | 3.37052  |
| 101 | H | -6.6004  | 3.212401 | 1.217713 |
| 102 | H | -6.06083 | 4.309103 | -1.26289 |
| 103 | H | -5.0323  | 5.014246 | -3.40896 |
| 104 | H | -2.6981  | 4.403131 | -3.94014 |
| 105 | H | -1.33258 | 3.089301 | -2.35228 |
| 106 | H | -5.72187 | -3.12536 | 1.820254 |
| 107 | H | -4.41192 | -3.83756 | 3.804739 |
| 108 | H | -2.09785 | -3.02687 | 4.134148 |
| 109 | H | -1.03912 | -1.51274 | 2.502888 |
| 110 | H | -2.80068 | 0.729975 | -2.30384 |
| 111 | H | -4.94295 | 0.629009 | -3.51626 |
| 112 | H | -6.83859 | -0.70242 | -2.64388 |

|     |   |          |          |          |
|-----|---|----------|----------|----------|
| 113 | H | -6.60764 | -1.98076 | -0.52939 |
|-----|---|----------|----------|----------|

**5CzTRZ**

| Tag | Symbol | X        | Y        | Z        |
|-----|--------|----------|----------|----------|
| 1   | C      | -0.15312 | 1.201049 | 0.166182 |
| 2   | C      | 1.252482 | 1.212522 | 0.155683 |
| 3   | C      | 1.958002 | 6.99E-05 | -3.2E-05 |
| 4   | C      | 1.25257  | -1.21242 | -0.15578 |
| 5   | C      | -0.15303 | -1.20106 | -0.16631 |
| 6   | C      | -0.85152 | -2.9E-05 | -6.8E-05 |
| 7   | N      | -0.86562 | 2.39675  | 0.357777 |
| 8   | N      | 1.943395 | 2.427208 | 0.267243 |
| 9   | N      | 3.358461 | 0.000077 | 1.11E-05 |
| 10  | N      | 1.943613 | -2.42704 | -0.26729 |
| 11  | N      | -0.86543 | -2.39683 | -0.35788 |
| 12  | C      | -1.7997  | 2.611874 | 1.369101 |
| 13  | C      | -2.46697 | 3.830061 | 1.119971 |
| 14  | C      | -1.93028 | 4.356078 | -0.11418 |
| 15  | C      | -0.95806 | 3.436261 | -0.56487 |
| 16  | C      | -2.22239 | 5.479783 | -0.88645 |
| 17  | C      | -1.5534  | 5.660933 | -2.08987 |
| 18  | C      | -0.60442 | 4.727187 | -2.52775 |
| 19  | C      | -0.29511 | 3.599939 | -1.77598 |
| 20  | C      | -2.09334 | 1.823734 | 2.478816 |
| 21  | C      | -3.08262 | 2.277985 | 3.343327 |
| 22  | C      | -3.75359 | 3.486023 | 3.114721 |
| 23  | C      | -3.45002 | 4.266754 | 2.00716  |
| 24  | C      | 2.828546 | 2.93877  | -0.68458 |
| 25  | C      | 3.335377 | 4.169444 | -0.21735 |

|    |   |          |          |          |
|----|---|----------|----------|----------|
| 26 | C | 2.729879 | 4.412051 | 1.072085 |
| 27 | C | 1.873301 | 3.322922 | 1.337489 |
| 28 | C | 3.173158 | 2.428696 | -1.93123 |
| 29 | C | 4.074524 | 3.156977 | -2.69784 |
| 30 | C | 4.604728 | 4.370294 | -2.24242 |
| 31 | C | 4.233636 | 4.885562 | -1.00765 |
| 32 | C | 2.854918 | 5.432987 | 2.013777 |
| 33 | C | 2.134122 | 5.350845 | 3.197402 |
| 34 | C | 1.301549 | 4.253573 | 3.450201 |
| 35 | C | 1.164556 | 3.2221   | 2.529682 |
| 36 | C | 4.175101 | 0.481981 | 1.027358 |
| 37 | C | 5.523911 | 0.306248 | 0.654587 |
| 38 | C | 5.523944 | -0.30592 | -0.65454 |
| 39 | C | 4.175153 | -0.48178 | -1.02732 |
| 40 | C | 3.81921  | 0.999589 | 2.267269 |
| 41 | C | 4.843242 | 1.386651 | 3.122651 |
| 42 | C | 6.187996 | 1.24193  | 2.760918 |
| 43 | C | 6.534904 | 0.694615 | 1.532841 |
| 44 | C | 6.53498  | -0.6942  | -1.53278 |
| 45 | C | 6.188132 | -1.24155 | -2.76086 |
| 46 | C | 4.843394 | -1.38641 | -3.1226  |
| 47 | C | 3.819318 | -0.99944 | -2.26722 |
| 48 | C | -0.95781 | -3.43631 | 0.5648   |
| 49 | C | -1.92992 | -4.35624 | 0.114117 |
| 50 | C | -2.46661 | -3.83033 | -1.12008 |
| 51 | C | -1.79946 | -2.61209 | -1.36924 |
| 52 | C | 1.873668 | -3.32279 | -1.33751 |
| 53 | C | 2.730289 | -4.41186 | -1.072   |
| 54 | C | 3.335676 | -4.16916 | 0.217474 |



|    |   |          |          |          |
|----|---|----------|----------|----------|
| 55 | C | 2.828739 | -2.93849 | 0.68461  |
| 56 | C | -0.29487 | -3.59988 | 1.775931 |
| 57 | C | -0.60409 | -4.72712 | 2.527739 |
| 58 | C | -1.55298 | -5.66097 | 2.08987  |
| 59 | C | -2.22195 | -5.47994 | 0.886428 |
| 60 | C | -3.44958 | -4.26716 | -2.00729 |
| 61 | C | -3.75318 | -3.48651 | -3.1149  |
| 62 | C | -3.08232 | -2.27843 | -3.34354 |
| 63 | C | -2.09311 | -1.82404 | -2.47901 |
| 64 | C | 4.233915 | -4.88519 | 1.007878 |
| 65 | C | 4.604887 | -4.36984 | 2.242655 |
| 66 | C | 4.074592 | -3.15653 | 2.697971 |
| 67 | C | 3.173244 | -2.42833 | 1.931251 |
| 68 | C | 1.165015 | -3.22206 | -2.52977 |
| 69 | C | 1.302137 | -4.25356 | -3.45023 |
| 70 | C | 2.134751 | -5.35077 | -3.19732 |
| 71 | C | 2.855459 | -5.43283 | -2.01364 |
| 72 | C | -2.33916 | -6.9E-05 | -4.4E-05 |
| 73 | N | -2.94026 | 0.852014 | -0.821   |
| 74 | C | -4.27901 | 0.848855 | -0.7515  |
| 75 | N | -4.98605 | -0.00013 | 1.27E-05 |
| 76 | C | -4.27894 | -0.84909 | 0.751497 |
| 77 | N | -2.94018 | -0.85218 | 0.820936 |
| 78 | C | -4.99767 | -1.8518  | 1.554674 |
| 79 | C | -4.99783 | 1.85153  | -1.55465 |
| 80 | C | -6.39579 | -1.86052 | 1.589729 |
| 81 | C | -7.06561 | -2.8256  | 2.329485 |
| 82 | C | -6.3463  | -3.79057 | 3.032973 |
| 83 | C | -4.9536  | -3.78592 | 2.998241 |

|     |   |          |          |          |
|-----|---|----------|----------|----------|
| 84  | C | -4.2784  | -2.81867 | 2.266216 |
| 85  | C | -4.27864 | 2.818421 | -2.26624 |
| 86  | C | -4.95392 | 3.785638 | -2.99823 |
| 87  | C | -6.34662 | 3.790243 | -3.03287 |
| 88  | C | -7.06586 | 2.825262 | -2.32932 |
| 89  | C | -6.39595 | 1.860207 | -1.5896  |
| 90  | H | -2.97308 | 6.191871 | -0.55701 |
| 91  | H | -1.7679  | 6.532231 | -2.70092 |
| 92  | H | -0.09462 | 4.884232 | -3.47331 |
| 93  | H | 0.436594 | 2.880779 | -2.12538 |
| 94  | H | -1.59461 | 0.87487  | 2.649611 |
| 95  | H | -3.34235 | 1.676148 | 4.208769 |
| 96  | H | -4.52288 | 3.809638 | 3.808544 |
| 97  | H | -3.97501 | 5.200262 | 1.827805 |
| 98  | H | 2.768572 | 1.491437 | -2.29507 |
| 99  | H | 4.373611 | 2.768573 | -3.66644 |
| 100 | H | 5.308699 | 4.913866 | -2.86459 |
| 101 | H | 4.633061 | 5.834175 | -0.66121 |
| 102 | H | 3.511193 | 6.276936 | 1.822718 |
| 103 | H | 2.217543 | 6.141306 | 3.936576 |
| 104 | H | 0.744412 | 4.204008 | 4.38066  |
| 105 | H | 0.517093 | 2.378452 | 2.738443 |
| 106 | H | 2.782828 | 1.111696 | 2.562608 |
| 107 | H | 4.587369 | 1.813944 | 4.087237 |
| 108 | H | 6.964895 | 1.555904 | 3.450846 |
| 109 | H | 7.577816 | 0.565808 | 1.258749 |
| 110 | H | 7.577877 | -0.5653  | -1.25868 |
| 111 | H | 6.965065 | -1.55545 | -3.45078 |
| 112 | H | 4.587567 | -1.81373 | -4.08718 |

|     |   |          |          |          |
|-----|---|----------|----------|----------|
| 113 | H | 2.782948 | -1.11166 | -2.56257 |
| 114 | H | 0.436765 | -2.88064 | 2.125317 |
| 115 | H | -0.0943  | -4.88408 | 3.473323 |
| 116 | H | -1.76742 | -6.53226 | 2.700952 |
| 117 | H | -2.97256 | -6.19211 | 0.556992 |
| 118 | H | -3.97449 | -5.20071 | -1.82791 |
| 119 | H | -4.52242 | -3.81024 | -3.80874 |
| 120 | H | -3.34207 | -1.67666 | -4.20902 |
| 121 | H | -1.59447 | -0.87514 | -2.64984 |
| 122 | H | 4.63342  | -5.8338  | 0.661516 |
| 123 | H | 5.308839 | -4.91335 | 2.864896 |
| 124 | H | 4.37359  | -2.76806 | 3.666567 |
| 125 | H | 2.76859  | -1.49107 | 2.29501  |
| 126 | H | 0.517518 | -2.37845 | -2.73861 |
| 127 | H | 0.745072 | -4.20406 | -4.38074 |
| 128 | H | 2.218275 | -6.14126 | -3.93646 |
| 129 | H | 3.511768 | -6.27673 | -1.82249 |
| 130 | H | -6.93599 | -1.10455 | 1.03032  |
| 131 | H | -8.15118 | -2.82888 | 2.357035 |
| 132 | H | -6.87325 | -4.54787 | 3.606572 |
| 133 | H | -4.38673 | -4.54134 | 3.533562 |
| 134 | H | -3.19506 | -2.80811 | 2.22508  |
| 135 | H | -3.1953  | 2.807902 | -2.22518 |
| 136 | H | -4.38712 | 4.541073 | -3.5336  |
| 137 | H | -6.87364 | 4.54753  | -3.60643 |
| 138 | H | -8.15142 | 2.828505 | -2.35679 |
| 139 | H | -6.93609 | 1.104219 | -1.03015 |

5CzBP

| Tag | Symbol | X        | Y        | Z        |
|-----|--------|----------|----------|----------|
| 1   | C      | -1.33793 | -0.63837 | 0.18817  |
| 2   | C      | -0.9666  | 0.714545 | 0.052867 |
| 3   | C      | 0.399139 | 1.058805 | 0.002546 |
| 4   | C      | 1.384404 | 0.052224 | 0.090445 |
| 5   | C      | 0.99628  | -1.29477 | 0.22598  |
| 6   | C      | -0.36241 | -1.64133 | 0.261313 |
| 7   | N      | -2.70002 | -0.98097 | 0.265995 |
| 8   | N      | -1.94981 | 1.708051 | -0.0586  |
| 9   | N      | 0.780408 | 2.399701 | -0.13522 |
| 10  | N      | 2.742458 | 0.399441 | 0.082376 |
| 11  | N      | 1.97662  | -2.29478 | 0.318732 |
| 12  | C      | -3.31094 | -1.64234 | 1.333187 |
| 13  | C      | -4.6678  | -1.86059 | 1.012193 |
| 14  | C      | -4.8811  | -1.31453 | -0.30785 |
| 15  | C      | -3.6482  | -0.77742 | -0.73563 |
| 16  | C      | -5.98494 | -1.26018 | -1.15853 |
| 17  | C      | -5.84137 | -0.68131 | -2.41201 |
| 18  | C      | -4.6049  | -0.16745 | -2.82459 |
| 19  | C      | -3.49001 | -0.2147  | -1.99787 |
| 20  | C      | -2.77367 | -2.02214 | 2.560311 |
| 21  | C      | -3.62153 | -2.65475 | 3.461412 |
| 22  | C      | -4.96813 | -2.89111 | 3.15661  |
| 23  | C      | -5.49804 | -2.49349 | 1.936724 |
| 24  | C      | -2.10217 | 2.576302 | -1.14268 |
| 25  | C      | -3.2009  | 3.425131 | -0.89276 |
| 26  | C      | -3.73489 | 3.055001 | 0.397906 |
| 27  | C      | -2.94238 | 1.993637 | 0.882508 |
| 28  | C      | -1.38868 | 2.631723 | -2.33483 |

|    |   |          |          |          |
|----|---|----------|----------|----------|
| 29 | C | -1.76924 | 3.586955 | -3.26936 |
| 30 | C | -2.84343 | 4.452587 | -3.03046 |
| 31 | C | -3.56764 | 4.372023 | -1.84843 |
| 32 | C | -4.78687 | 3.536909 | 1.176292 |
| 33 | C | -5.02627 | 2.961921 | 2.417171 |
| 34 | C | -4.21503 | 1.923056 | 2.890076 |
| 35 | C | -3.15771 | 1.430808 | 2.135459 |
| 36 | C | 0.413657 | 3.446246 | 0.716486 |
| 37 | C | 0.966249 | 4.646348 | 0.223606 |
| 38 | C | 1.69595  | 4.313304 | -0.97821 |
| 39 | C | 1.563597 | 2.922234 | -1.16923 |
| 40 | C | -0.30823 | 3.405724 | 1.90374  |
| 41 | C | -0.5105  | 4.604114 | 2.576826 |
| 42 | C | 0.009961 | 5.809339 | 2.09036  |
| 43 | C | 0.756187 | 5.835969 | 0.919736 |
| 44 | C | 2.417407 | 5.068075 | -1.90216 |
| 45 | C | 2.985459 | 4.430668 | -2.99713 |
| 46 | C | 2.824599 | 3.052257 | -3.18163 |
| 47 | C | 2.105337 | 2.280842 | -2.27716 |
| 48 | C | 2.940254 | -2.3996  | 1.320433 |
| 49 | C | 3.77396  | -3.50124 | 1.033044 |
| 50 | C | 3.275386 | -4.09993 | -0.18366 |
| 51 | C | 2.160255 | -3.33461 | -0.58905 |
| 52 | C | 3.706339 | -0.07096 | -0.81306 |
| 53 | C | 4.962029 | 0.457158 | -0.44738 |
| 54 | C | 4.749338 | 1.279568 | 0.721443 |
| 55 | C | 3.372234 | 1.221921 | 1.021053 |
| 56 | C | 3.113936 | -1.62277 | 2.459615 |
| 57 | C | 4.176983 | -1.9391  | 3.295049 |

|    |   |          |          |          |
|----|---|----------|----------|----------|
| 58 | C | 5.031032 | -3.01392 | 3.015256 |
| 59 | C | 4.829818 | -3.80477 | 1.892511 |
| 60 | C | 3.67906  | -5.18438 | -0.96107 |
| 61 | C | 2.974476 | -5.48678 | -2.11957 |
| 62 | C | 1.877844 | -4.70966 | -2.51083 |
| 63 | C | 1.459228 | -3.62008 | -1.756   |
| 64 | C | 5.598766 | 2.026352 | 1.536942 |
| 65 | C | 5.067266 | 2.693465 | 2.632468 |
| 66 | C | 3.700763 | 2.607492 | 2.925309 |
| 67 | C | 2.83603  | 1.865326 | 2.130623 |
| 68 | C | 3.548365 | -0.87065 | -1.93911 |
| 69 | C | 4.684166 | -1.17745 | -2.67782 |
| 70 | C | 5.94294  | -0.68228 | -2.31655 |
| 71 | C | 6.087042 | 0.142406 | -1.2089  |
| 72 | C | -0.74634 | -3.08326 | 0.529736 |
| 73 | C | -1.7143  | -3.76445 | -0.36246 |
| 74 | C | -2.30529 | -4.94309 | 0.103282 |
| 75 | C | -3.23921 | -5.60673 | -0.6776  |
| 76 | C | -3.58535 | -5.10204 | -1.93079 |
| 77 | C | -2.9924  | -3.93522 | -2.405   |
| 78 | C | -2.05879 | -3.26903 | -1.6222  |
| 79 | O | -0.27016 | -3.63335 | 1.504846 |
| 80 | H | -6.94012 | -1.67011 | -0.84391 |
| 81 | H | -6.69354 | -0.62702 | -3.08216 |
| 82 | H | -4.51116 | 0.283892 | -3.80751 |
| 83 | H | -2.53839 | 0.185102 | -2.32832 |
| 84 | H | -1.7284  | -1.85995 | 2.800344 |
| 85 | H | -3.22513 | -2.97308 | 4.420587 |
| 86 | H | -5.6019  | -3.38807 | 3.884279 |

|     |   |          |          |          |
|-----|---|----------|----------|----------|
| 87  | H | -6.54457 | -2.66764 | 1.704532 |
| 88  | H | -0.55585 | 1.96718  | -2.53293 |
| 89  | H | -1.21337 | 3.66233  | -4.19879 |
| 90  | H | -3.11359 | 5.189937 | -3.77977 |
| 91  | H | -4.41087 | 5.032641 | -1.66957 |
| 92  | H | -5.40547 | 4.353372 | 0.815571 |
| 93  | H | -5.84595 | 3.322924 | 3.030317 |
| 94  | H | -4.41342 | 1.485337 | 3.863516 |
| 95  | H | -2.53509 | 0.629558 | 2.51562  |
| 96  | H | -0.71226 | 2.479062 | 2.293777 |
| 97  | H | -1.08944 | 4.598748 | 3.495099 |
| 98  | H | -0.16751 | 6.729235 | 2.63847  |
| 99  | H | 1.175299 | 6.76761  | 0.551277 |
| 100 | H | 2.527365 | 6.140017 | -1.76707 |
| 101 | H | 3.555735 | 5.005007 | -3.72035 |
| 102 | H | 3.273367 | 2.568008 | -4.04338 |
| 103 | H | 1.98611  | 1.215587 | -2.43469 |
| 104 | H | 2.452309 | -0.79611 | 2.689839 |
| 105 | H | 4.345569 | -1.33595 | 4.181767 |
| 106 | H | 5.853147 | -3.23305 | 3.689309 |
| 107 | H | 5.481983 | -4.64802 | 1.684722 |
| 108 | H | 4.53647  | -5.7813  | -0.66432 |
| 109 | H | 3.276725 | -6.33203 | -2.72979 |
| 110 | H | 1.339075 | -4.95939 | -3.41975 |
| 111 | H | 0.615809 | -3.01753 | -2.07296 |
| 112 | H | 6.661357 | 2.078597 | 1.318789 |
| 113 | H | 5.715925 | 3.283504 | 3.27222  |
| 114 | H | 3.300965 | 3.132778 | 3.787161 |
| 115 | H | 1.781824 | 1.802144 | 2.372768 |

|     |   |          |          |          |
|-----|---|----------|----------|----------|
| 116 | H | 2.579897 | -1.25913 | -2.23145 |
| 117 | H | 4.586794 | -1.81982 | -3.54749 |
| 118 | H | 6.811992 | -0.94218 | -2.91271 |
| 119 | H | 7.060561 | 0.540132 | -0.93785 |
| 120 | H | -2.02458 | -5.30422 | 1.086932 |
| 121 | H | -3.70703 | -6.51445 | -0.30908 |
| 122 | H | -4.32445 | -5.61742 | -2.53711 |
| 123 | H | -3.27076 | -3.53123 | -3.37299 |
| 124 | H | -1.60716 | -2.35182 | -1.98739 |



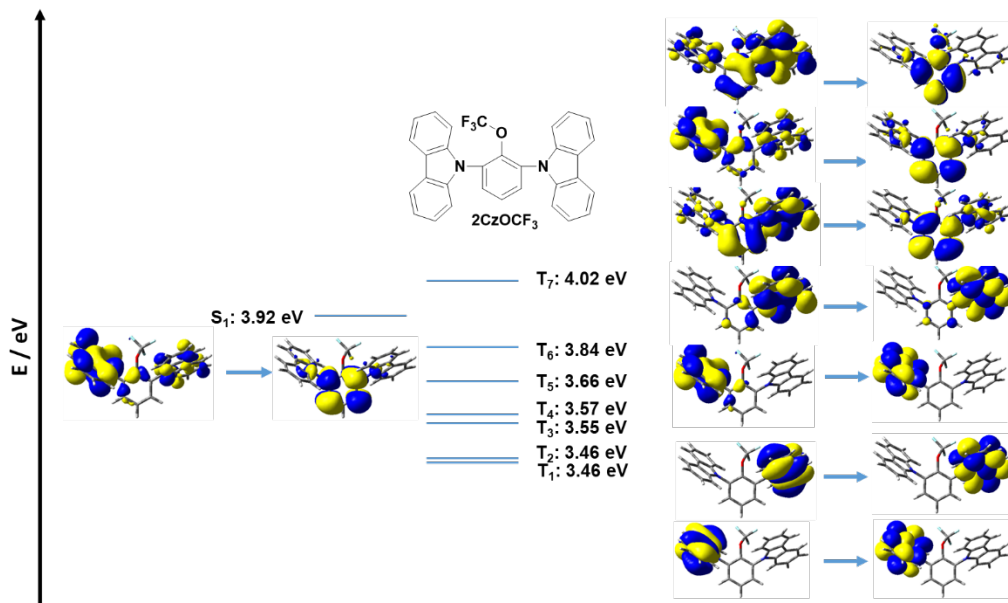

Figure S1. HONTOs and LUNTOs of **2CzOCF<sub>3</sub>** in higher excited states

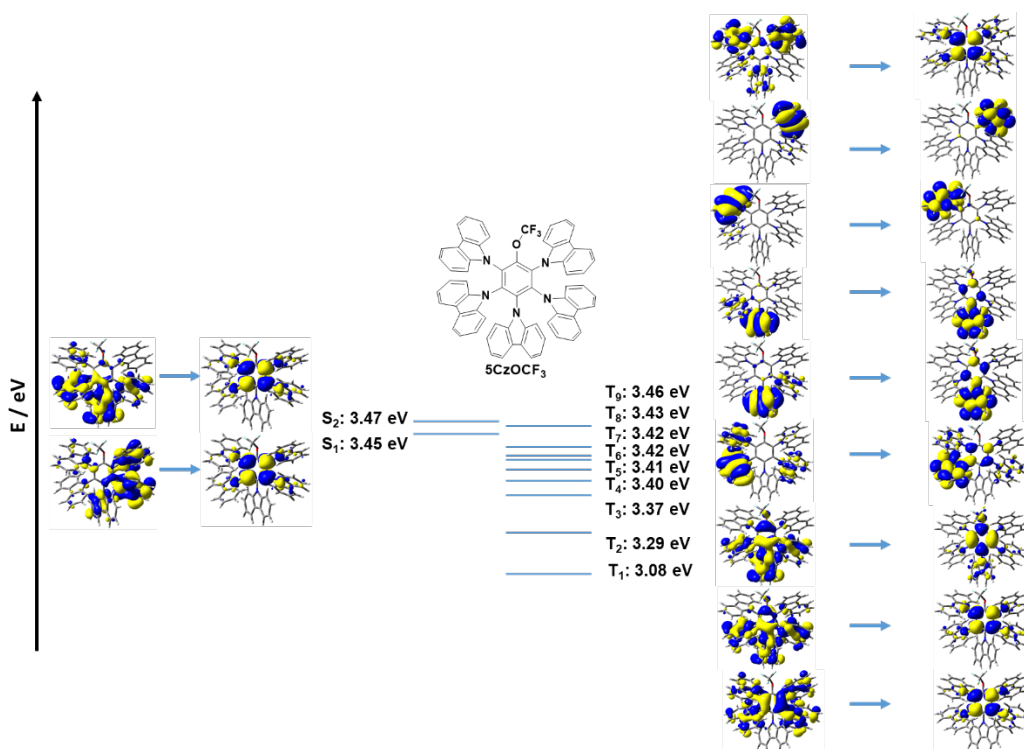

Figure S2. HONTOs and LUNTOs of **5CzOCF<sub>3</sub>** in higher excited states

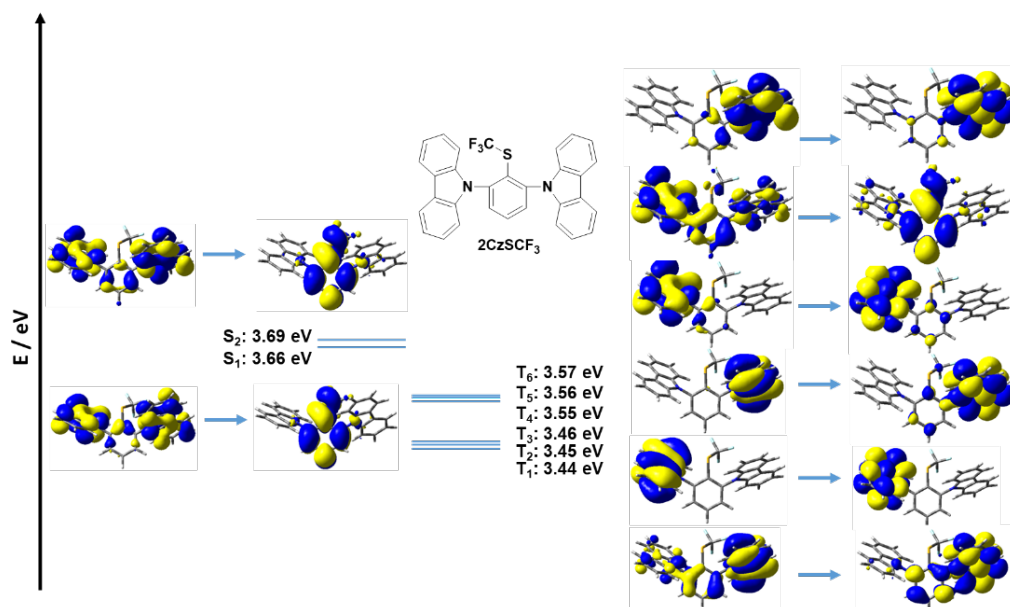

Figure S3. HONTOs and LUNTOs of **2CzSCF<sub>3</sub>** in higher excited states

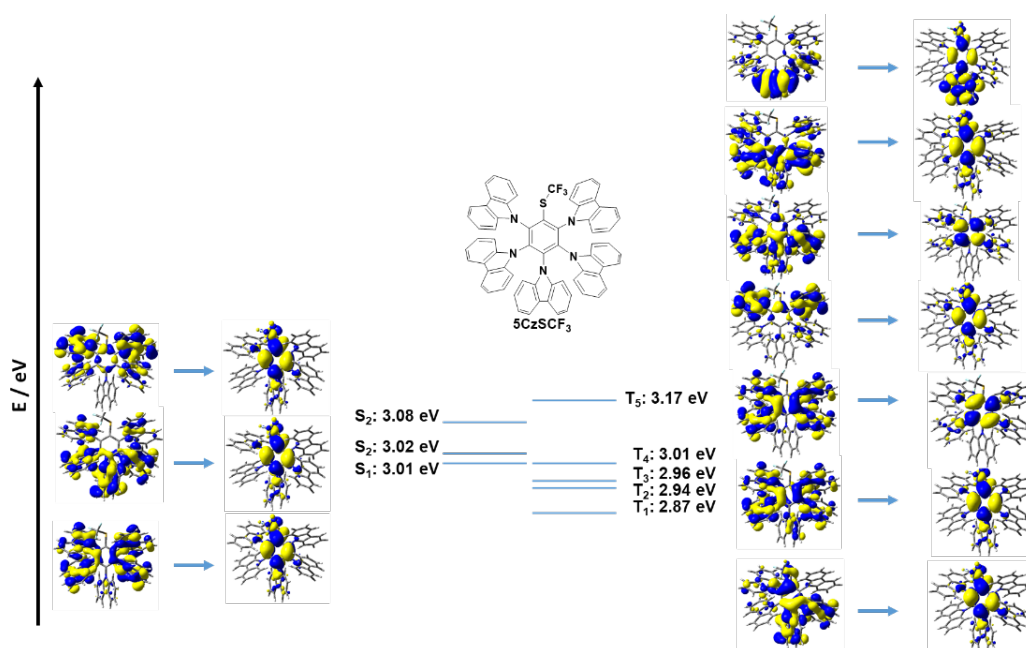

Figure S4. HONTOs and LUNTOs of **5CzSCF<sub>3</sub>** in higher excited states

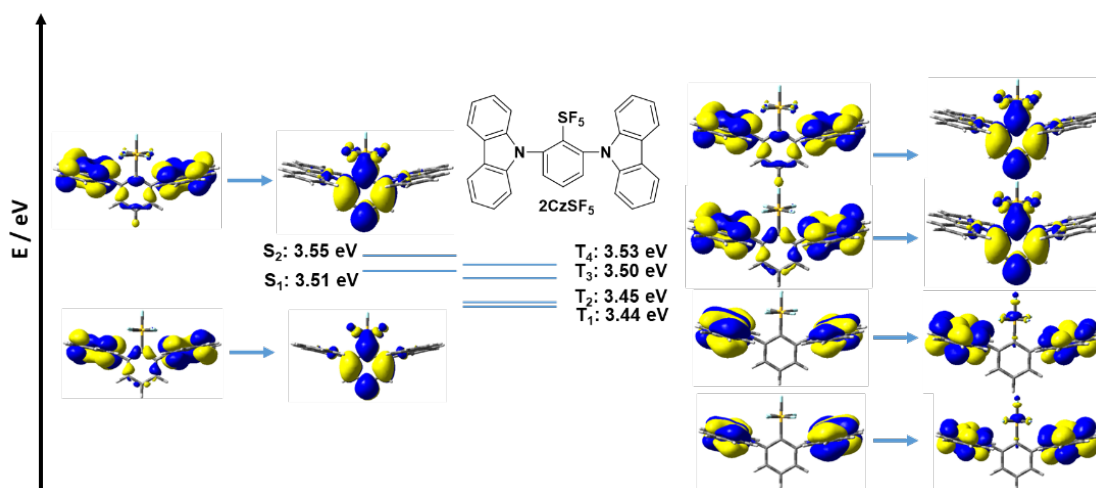

Figure S5. HONTOs and LUNTOs of **2CzSF<sub>5</sub>** in higher excited states

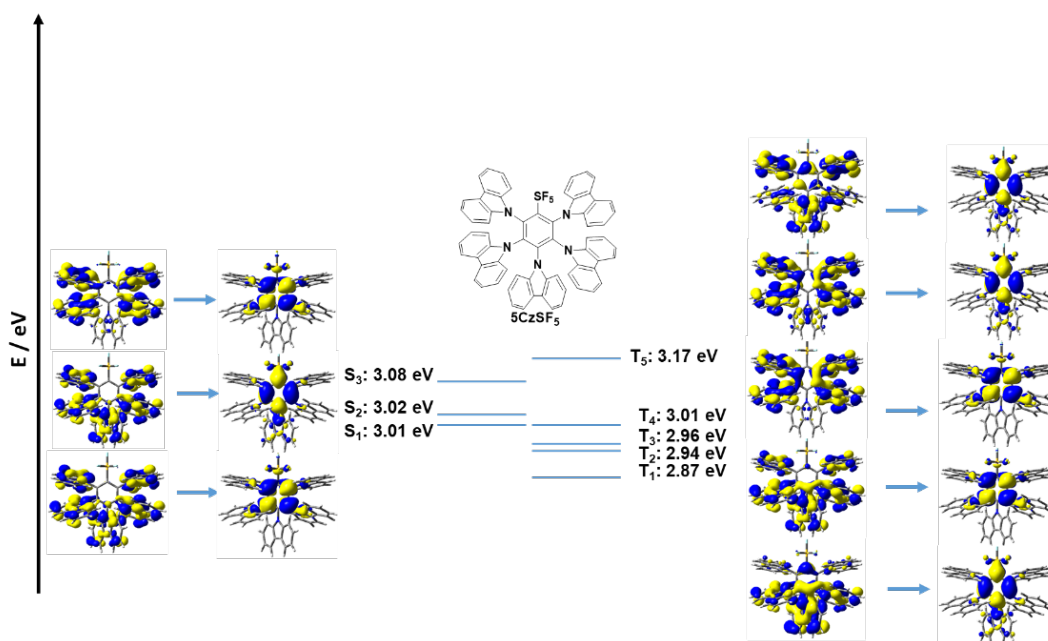

Figure S6. HONTOs and LUNTOs of **5CzSF<sub>5</sub>** in higher excited states

Table S1: SOCME calculation result of **2CzCF<sub>3</sub>**

| Singlet | Triplet | RSS (cm <sup>-1</sup> ) | 1 (cm <sup>-1</sup> ) | 0 (cm <sup>-1</sup> ) | -1 (cm <sup>-1</sup> ) |
|---------|---------|-------------------------|-----------------------|-----------------------|------------------------|
| S(0)    | T(1)    | 0.7999                  | 0.2088                | 0.7434                | 0.2088                 |
| S(0)    | T(2)    | 0.8084                  | 0.2446                | 0.7307                | 0.2446                 |
| S(0)    | T(3)    | 1.6001                  | 0.8678                | 1.0267                | 0.8678                 |
| S(0)    | T(4)    | 2.3262                  | 1.1585                | 1.6513                | 1.1585                 |
| S(0)    | T(5)    | 0.5477                  | 0.2006                | 0.4686                | 0.2006                 |
| S(0)    | T(6)    | 1.7353                  | 1.02                  | 0.9646                | 1.02                   |
| S(0)    | T(7)    | 2.2683                  | 1.4679                | 0.9142                | 1.4679                 |
| S(0)    | T(8)    | 1.7175                  | 1.1087                | 0.7011                | 1.1087                 |
| S(0)    | T(9)    | 0.4333                  | 0.2652                | 0.2169                | 0.2652                 |
| S(0)    | T(10)   | 0.4875                  | 0.2901                | 0.2632                | 0.2901                 |

|      |       |        |        |        |        |
|------|-------|--------|--------|--------|--------|
| S(1) | T(1)  | 0.1783 | 0.1002 | 0.1082 | 0.1002 |
| S(1) | T(2)  | 0.121  | 0.0851 | 0.0122 | 0.0851 |
| S(1) | T(3)  | 0.2811 | 0.1544 | 0.177  | 0.1544 |
| S(1) | T(4)  | 0.372  | 0.263  | 0.0028 | 0.263  |
| S(1) | T(5)  | 0.329  | 0.1457 | 0.2565 | 0.1457 |
| S(1) | T(6)  | 0.3673 | 0.2522 | 0.0873 | 0.2522 |
| S(1) | T(7)  | 0.8463 | 0.5918 | 0.1261 | 0.5918 |
| S(1) | T(8)  | 0.2769 | 0.0635 | 0.2619 | 0.0635 |
| S(1) | T(9)  | 0.51   | 0.2672 | 0.3426 | 0.2672 |
| S(1) | T(10) | 0.4436 | 0.2844 | 0.1872 | 0.2844 |
| S(2) | T(1)  | 0.1051 | 0.0734 | 0.0164 | 0.0734 |
| S(2) | T(2)  | 0.149  | 0.0669 | 0.115  | 0.0669 |
| S(2) | T(3)  | 0.7254 | 0.4653 | 0.3054 | 0.4653 |
| S(2) | T(4)  | 0.6262 | 0.3527 | 0.3787 | 0.3527 |
| S(2) | T(5)  | 0.1974 | 0.133  | 0.06   | 0.133  |
| S(2) | T(6)  | 0.6741 | 0.3931 | 0.3813 | 0.3931 |
| S(2) | T(7)  | 0.292  | 0.1823 | 0.1372 | 0.1823 |
| S(2) | T(8)  | 0.5671 | 0.2429 | 0.4512 | 0.2429 |
| S(2) | T(9)  | 0.1071 | 0.0441 | 0.0871 | 0.0441 |
| S(2) | T(10) | 0.4246 | 0.1314 | 0.3817 | 0.1314 |
| S(3) | T(1)  | 0.2446 | 0.1695 | 0.049  | 0.1695 |
| S(3) | T(2)  | 0.2588 | 0.1827 | 0.013  | 0.1827 |
| S(3) | T(3)  | 0.5492 | 0.3865 | 0.054  | 0.3865 |
| S(3) | T(4)  | 0.3663 | 0.2091 | 0.2162 | 0.2091 |
| S(3) | T(5)  | 0.1183 | 0.0765 | 0.0478 | 0.0765 |
| S(3) | T(6)  | 0.4049 | 0.2721 | 0.1261 | 0.2721 |
| S(3) | T(7)  | 0.4955 | 0.3502 | 0.0128 | 0.3502 |
| S(3) | T(8)  | 0.5714 | 0.3931 | 0.1321 | 0.3931 |
| S(3) | T(9)  | 0.0216 | 0.0101 | 0.0163 | 0.0101 |
| S(3) | T(10) | 0.1589 | 0.1111 | 0.0237 | 0.1111 |
| S(4) | T(1)  | 0.205  | 0.111  | 0.1318 | 0.111  |
| S(4) | T(2)  | 0.131  | 0.0911 | 0.0239 | 0.0911 |
| S(4) | T(3)  | 0.4897 | 0.1151 | 0.4618 | 0.1151 |
| S(4) | T(4)  | 0.3158 | 0.146  | 0.2389 | 0.146  |
| S(4) | T(5)  | 0.3253 | 0.1682 | 0.2218 | 0.1682 |
| S(4) | T(6)  | 0.5551 | 0.2114 | 0.4677 | 0.2114 |
| S(4) | T(7)  | 0.4846 | 0.3316 | 0.1222 | 0.3316 |
| S(4) | T(8)  | 0.5695 | 0.3862 | 0.1614 | 0.3862 |
| S(4) | T(9)  | 0.021  | 0.0136 | 0.0085 | 0.0136 |
| S(4) | T(10) | 0.1487 | 0.0574 | 0.1246 | 0.0574 |
| S(5) | T(1)  | 0.1113 | 0.0482 | 0.0879 | 0.0482 |
| S(5) | T(2)  | 0.517  | 0.2451 | 0.3835 | 0.2451 |
| S(5) | T(3)  | 0.1753 | 0.0994 | 0.1046 | 0.0994 |

|      |       |        |        |        |        |
|------|-------|--------|--------|--------|--------|
| S(5) | T(4)  | 0.3394 | 0.1962 | 0.1955 | 0.1962 |
| S(5) | T(5)  | 0.0435 | 0.0218 | 0.0307 | 0.0218 |
| S(5) | T(6)  | 0.2946 | 0.1871 | 0.1294 | 0.1871 |
| S(5) | T(7)  | 0.26   | 0.1335 | 0.1787 | 0.1335 |
| S(5) | T(8)  | 0.0783 | 0.0546 | 0.0126 | 0.0546 |
| S(5) | T(9)  | 0.0899 | 0.0516 | 0.0525 | 0.0516 |
| S(5) | T(10) | 0.214  | 0.1282 | 0.1137 | 0.1282 |
| S(6) | T(1)  | 0.3284 | 0.2243 | 0.0846 | 0.2243 |
| S(6) | T(2)  | 0.0564 | 0.0327 | 0.0322 | 0.0327 |
| S(6) | T(3)  | 0.3842 | 0.1832 | 0.2837 | 0.1832 |
| S(6) | T(4)  | 0.1436 | 0.0924 | 0.0597 | 0.0924 |
| S(6) | T(5)  | 0.1497 | 0.0791 | 0.0994 | 0.0791 |
| S(6) | T(6)  | 0.0863 | 0.0298 | 0.0753 | 0.0298 |
| S(6) | T(7)  | 0.2585 | 0.1482 | 0.1514 | 0.1482 |
| S(6) | T(8)  | 0.039  | 0.027  | 0.0082 | 0.027  |
| S(6) | T(9)  | 0.0468 | 0.0272 | 0.0267 | 0.0272 |
| S(6) | T(10) | 0.1209 | 0.0694 | 0.0704 | 0.0694 |
| S(7) | T(1)  | 0.9378 | 0.3585 | 0.7889 | 0.3585 |
| S(7) | T(2)  | 0.3764 | 0.0426 | 0.3715 | 0.0426 |
| S(7) | T(3)  | 0.4104 | 0.1468 | 0.354  | 0.1468 |
| S(7) | T(4)  | 0.1263 | 0.0497 | 0.1049 | 0.0497 |
| S(7) | T(5)  | 0.1156 | 0.0425 | 0.0988 | 0.0425 |
| S(7) | T(6)  | 0.0732 | 0.0507 | 0.0145 | 0.0507 |
| S(7) | T(7)  | 0.2793 | 0.1777 | 0.1218 | 0.1777 |
| S(7) | T(8)  | 0.1759 | 0.1171 | 0.0594 | 0.1171 |
| S(7) | T(9)  | 0.044  | 0.0204 | 0.0332 | 0.0204 |
| S(7) | T(10) | 0.3294 | 0.2179 | 0.1165 | 0.2179 |
| S(8) | T(1)  | 0.2831 | 0.0143 | 0.2824 | 0.0143 |
| S(8) | T(2)  | 0.9584 | 0.5052 | 0.6387 | 0.5052 |
| S(8) | T(3)  | 0.1616 | 0.0617 | 0.136  | 0.0617 |
| S(8) | T(4)  | 0.1357 | 0.0641 | 0.101  | 0.0641 |
| S(8) | T(5)  | 0.0612 | 0.0405 | 0.0217 | 0.0405 |
| S(8) | T(6)  | 0.0532 | 0.0329 | 0.0259 | 0.0329 |
| S(8) | T(7)  | 0.2805 | 0.1793 | 0.12   | 0.1793 |
| S(8) | T(8)  | 0.4755 | 0.3136 | 0.1714 | 0.3136 |
| S(8) | T(9)  | 0.3258 | 0.1731 | 0.2149 | 0.1731 |
| S(8) | T(10) | 0.12   | 0.0825 | 0.0282 | 0.0825 |
| S(9) | T(1)  | 0.1397 | 0.0343 | 0.131  | 0.0343 |
| S(9) | T(2)  | 0.4823 | 0.024  | 0.4811 | 0.024  |
| S(9) | T(3)  | 0.1681 | 0.0251 | 0.1643 | 0.0251 |
| S(9) | T(4)  | 0.201  | 0.1421 | 0.004  | 0.1421 |
| S(9) | T(5)  | 0.0657 | 0.0346 | 0.0437 | 0.0346 |
| S(9) | T(6)  | 0.1437 | 0.0933 | 0.057  | 0.0933 |

|       |       |        |        |          |        |
|-------|-------|--------|--------|----------|--------|
| S(9)  | T(7)  | 0.075  | 0.0234 | 0.0673   | 0.0234 |
| S(9)  | T(8)  | 0.2871 | 0.1176 | 0.234    | 0.1176 |
| S(9)  | T(9)  | 0.3413 | 0.1314 | 0.2863   | 0.1314 |
| S(9)  | T(10) | 0.0619 | 0.0428 | 0.0131   | 0.0428 |
| S(10) | T(1)  | 0.3342 | 0.1991 | 0.1799   | 0.1991 |
| S(10) | T(2)  | 0.0541 | 0.0382 | 3.00E-04 | 0.0382 |
| S(10) | T(3)  | 0.2755 | 0.1834 | 0.0929   | 0.1834 |
| S(10) | T(4)  | 0.1724 | 0.09   | 0.1163   | 0.09   |
| S(10) | T(5)  | 0.0679 | 0.0297 | 0.0533   | 0.0297 |
| S(10) | T(6)  | 0.1409 | 0.0951 | 0.0422   | 0.0951 |
| S(10) | T(7)  | 0.3453 | 0.1898 | 0.2173   | 0.1898 |
| S(10) | T(8)  | 0.2154 | 0.0995 | 0.1631   | 0.0995 |
| S(10) | T(9)  | 0.0144 | 0.0101 | 0.0021   | 0.0101 |
| S(10) | T(10) | 0.4294 | 0.1358 | 0.3841   | 0.1358 |

Table S2: SOCME calculation result of **2CzOCF<sub>3</sub>**

| Singlet | Triplet | RSS (cm <sup>-1</sup> ) | 1 (cm <sup>-1</sup> ) | 0 (cm <sup>-1</sup> ) | -1 (cm <sup>-1</sup> ) |
|---------|---------|-------------------------|-----------------------|-----------------------|------------------------|
| S(0)    | T(1)    | 0.384                   | 0.0581                | 0.3751                | 0.0581                 |
| S(0)    | T(2)    | 0.4657                  | 0.1236                | 0.4316                | 0.1236                 |
| S(0)    | T(3)    | 0.2177                  | 0.1512                | 0.0404                | 0.1512                 |
| S(0)    | T(4)    | 0.4134                  | 0.2827                | 0.1055                | 0.2827                 |
| S(0)    | T(5)    | 1.0317                  | 0.5834                | 0.6194                | 0.5834                 |
| S(0)    | T(6)    | 3.14                    | 2.2031                | 0.3901                | 2.2031                 |
| S(0)    | T(7)    | 2.9283                  | 0.6056                | 2.8002                | 0.6056                 |
| S(0)    | T(8)    | 1.3829                  | 0.5935                | 1.099                 | 0.5935                 |
| S(0)    | T(9)    | 1.8261                  | 0.363                 | 1.7524                | 0.363                  |
| S(0)    | T(10)   | 1.4881                  | 0.5453                | 1.2728                | 0.5453                 |
| S(1)    | T(1)    | 0.2384                  | 0.1681                | 0.0168                | 0.1681                 |
| S(1)    | T(2)    | 0.1188                  | 0.0833                | 0.0152                | 0.0833                 |
| S(1)    | T(3)    | 0.1562                  | 0.1101                | 0.0112                | 0.1101                 |
| S(1)    | T(4)    | 0.2481                  | 0.1742                | 0.0294                | 0.1742                 |
| S(1)    | T(5)    | 0.8427                  | 0.5847                | 0.1625                | 0.5847                 |
| S(1)    | T(6)    | 0.2028                  | 0.1265                | 0.0955                | 0.1265                 |
| S(1)    | T(7)    | 0.1407                  | 0.0677                | 0.1031                | 0.0677                 |
| S(1)    | T(8)    | 0.4529                  | 0.3187                | 0.0442                | 0.3187                 |
| S(1)    | T(9)    | 0.4993                  | 0.3528                | 0.019                 | 0.3528                 |
| S(1)    | T(10)   | 0.2438                  | 0.1713                | 0.0273                | 0.1713                 |
| S(2)    | T(1)    | 0.1464                  | 0.1029                | 0.0163                | 0.1029                 |
| S(2)    | T(2)    | 0.2285                  | 0.156                 | 0.0595                | 0.156                  |
| S(2)    | T(3)    | 0.1182                  | 0.0831                | 0.0128                | 0.0831                 |
| S(2)    | T(4)    | 0.1515                  | 0.1025                | 0.0442                | 0.1025                 |
| S(2)    | T(5)    | 0.5384                  | 0.2529                | 0.4025                | 0.2529                 |
| S(2)    | T(6)    | 0.9028                  | 0.6357                | 0.0836                | 0.6357                 |

|      |       |        |        |        |        |
|------|-------|--------|--------|--------|--------|
| S(2) | T(7)  | 0.4027 | 0.2836 | 0.0352 | 0.2836 |
| S(2) | T(8)  | 0.9836 | 0.6951 | 0.0341 | 0.6951 |
| S(2) | T(9)  | 0.1402 | 0.0959 | 0.0357 | 0.0959 |
| S(2) | T(10) | 0.4586 | 0.3227 | 0.0459 | 0.3227 |
| S(3) | T(1)  | 0.1579 | 0.089  | 0.0954 | 0.089  |
| S(3) | T(2)  | 0.0721 | 0.034  | 0.0537 | 0.034  |
| S(3) | T(3)  | 0.3577 | 0.1781 | 0.2539 | 0.1781 |
| S(3) | T(4)  | 0.0897 | 0.0484 | 0.0581 | 0.0484 |
| S(3) | T(5)  | 0.4232 | 0.2985 | 0.0289 | 0.2985 |
| S(3) | T(6)  | 0.2277 | 0.1129 | 0.1623 | 0.1129 |
| S(3) | T(7)  | 0.4566 | 0.3226 | 0.0163 | 0.3226 |
| S(3) | T(8)  | 0.5377 | 0.3741 | 0.096  | 0.3741 |
| S(3) | T(9)  | 0.115  | 0.0776 | 0.0343 | 0.0776 |
| S(3) | T(10) | 0.0282 | 0.0198 | 0.003  | 0.0198 |
| S(4) | T(1)  | 0.1147 | 0.0565 | 0.0823 | 0.0565 |
| S(4) | T(2)  | 0.3869 | 0.198  | 0.2671 | 0.198  |
| S(4) | T(3)  | 0.0749 | 0.0412 | 0.047  | 0.0412 |
| S(4) | T(4)  | 0.3122 | 0.1752 | 0.1899 | 0.1752 |
| S(4) | T(5)  | 0.6667 | 0.4704 | 0.0447 | 0.4704 |
| S(4) | T(6)  | 0.1529 | 0.1015 | 0.0525 | 0.1015 |
| S(4) | T(7)  | 0.496  | 0.3461 | 0.0802 | 0.3461 |
| S(4) | T(8)  | 0.589  | 0.4161 | 0.0258 | 0.4161 |
| S(4) | T(9)  | 0.1523 | 0.1059 | 0.0274 | 0.1059 |
| S(4) | T(10) | 0.2869 | 0.1938 | 0.0845 | 0.1938 |
| S(5) | T(1)  | 1.1397 | 0.5538 | 0.8279 | 0.5538 |
| S(5) | T(2)  | 0.0579 | 0.0353 | 0.0294 | 0.0353 |
| S(5) | T(3)  | 0.0542 | 0.0156 | 0.0495 | 0.0156 |
| S(5) | T(4)  | 0.0314 | 0.0162 | 0.0215 | 0.0162 |
| S(5) | T(5)  | 0.2254 | 0.1593 | 0.0072 | 0.1593 |
| S(5) | T(6)  | 0.2443 | 0.1708 | 0.0367 | 0.1708 |
| S(5) | T(7)  | 0.1539 | 0.0345 | 0.146  | 0.0345 |
| S(5) | T(8)  | 0.366  | 0.095  | 0.3404 | 0.095  |
| S(5) | T(9)  | 0.335  | 0.1867 | 0.2062 | 0.1867 |
| S(5) | T(10) | 0.0305 | 0.02   | 0.0116 | 0.02   |
| S(6) | T(1)  | 0.0944 | 0.0607 | 0.0393 | 0.0607 |
| S(6) | T(2)  | 1.105  | 0.5305 | 0.8112 | 0.5305 |
| S(6) | T(3)  | 0.0095 | 0.0038 | 0.0078 | 0.0038 |
| S(6) | T(4)  | 0.0925 | 0.0329 | 0.0799 | 0.0329 |
| S(6) | T(5)  | 0.3801 | 0.2686 | 0.0124 | 0.2686 |
| S(6) | T(6)  | 0.1875 | 0.1236 | 0.0679 | 0.1236 |
| S(6) | T(7)  | 0.2317 | 0.0433 | 0.2235 | 0.0433 |
| S(6) | T(8)  | 0.2269 | 0.1435 | 0.1015 | 0.1435 |
| S(6) | T(9)  | 0.0517 | 0.0333 | 0.0214 | 0.0333 |

|       |       |        |        |          |        |
|-------|-------|--------|--------|----------|--------|
| S(6)  | T(10) | 0.3716 | 0.1977 | 0.2447   | 0.1977 |
| S(7)  | T(1)  | 0.3087 | 0.1059 | 0.2699   | 0.1059 |
| S(7)  | T(2)  | 0.089  | 0.0475 | 0.0584   | 0.0475 |
| S(7)  | T(3)  | 0.0827 | 0.0413 | 0.0586   | 0.0413 |
| S(7)  | T(4)  | 0.0325 | 0.0228 | 0.0042   | 0.0228 |
| S(7)  | T(5)  | 0.238  | 0.131  | 0.1493   | 0.131  |
| S(7)  | T(6)  | 0.5012 | 0.2324 | 0.3784   | 0.2324 |
| S(7)  | T(7)  | 0.033  | 0.0148 | 0.0255   | 0.0148 |
| S(7)  | T(8)  | 0.1111 | 0.0761 | 0.0272   | 0.0761 |
| S(7)  | T(9)  | 0.1386 | 0.0735 | 0.0916   | 0.0735 |
| S(7)  | T(10) | 0.0388 | 0.025  | 0.0158   | 0.025  |
| S(8)  | T(1)  | 0.0182 | 0.011  | 0.0094   | 0.011  |
| S(8)  | T(2)  | 0.3886 | 0.2711 | 0.0633   | 0.2711 |
| S(8)  | T(3)  | 0.0145 | 0.0068 | 0.0109   | 0.0068 |
| S(8)  | T(4)  | 0.2011 | 0.1067 | 0.1328   | 0.1067 |
| S(8)  | T(5)  | 0.4839 | 0.243  | 0.3406   | 0.243  |
| S(8)  | T(6)  | 0.3508 | 0.2004 | 0.2067   | 0.2004 |
| S(8)  | T(7)  | 0.1235 | 0.0684 | 0.0767   | 0.0684 |
| S(8)  | T(8)  | 0.0714 | 0.0498 | 0.012    | 0.0498 |
| S(8)  | T(9)  | 0.0179 | 0.0125 | 0.003    | 0.0125 |
| S(8)  | T(10) | 0.042  | 0.0296 | 0.0014   | 0.0296 |
| S(9)  | T(1)  | 0.3786 | 0.1654 | 0.2977   | 0.1654 |
| S(9)  | T(2)  | 0.0138 | 0.0092 | 0.0047   | 0.0092 |
| S(9)  | T(3)  | 0.0258 | 0.0167 | 0.0104   | 0.0167 |
| S(9)  | T(4)  | 0.0091 | 0.0054 | 0.0049   | 0.0054 |
| S(9)  | T(5)  | 0.1285 | 0.0624 | 0.0934   | 0.0624 |
| S(9)  | T(6)  | 0.0572 | 0.0167 | 0.0521   | 0.0167 |
| S(9)  | T(7)  | 0.3201 | 0.1618 | 0.2238   | 0.1618 |
| S(9)  | T(8)  | 0.4427 | 0.21   | 0.3283   | 0.21   |
| S(9)  | T(9)  | 0.1969 | 0.1112 | 0.1185   | 0.1112 |
| S(9)  | T(10) | 0.0171 | 0.012  | 0.0024   | 0.012  |
| S(10) | T(1)  | 0.0164 | 0.0029 | 0.0158   | 0.0029 |
| S(10) | T(2)  | 0.2755 | 0.115  | 0.2224   | 0.115  |
| S(10) | T(3)  | 0.0021 | 0.0014 | 8.00E-04 | 0.0014 |
| S(10) | T(4)  | 0.0982 | 0.0541 | 0.0616   | 0.0541 |
| S(10) | T(5)  | 0.144  | 0.0697 | 0.105    | 0.0697 |
| S(10) | T(6)  | 0.0288 | 0.0175 | 0.0148   | 0.0175 |
| S(10) | T(7)  | 0.5482 | 0.284  | 0.3731   | 0.284  |
| S(10) | T(8)  | 0.2339 | 0.1079 | 0.1773   | 0.1079 |
| S(10) | T(9)  | 0.0145 | 0.0086 | 0.008    | 0.0086 |
| S(10) | T(10) | 0.1771 | 0.1089 | 0.0874   | 0.1089 |

Table S3: SOCME calculation result of **2CzSCF<sub>3</sub>**



| Singlet | Triplet | RSS (cm <sup>-1</sup> ) | 1 (cm <sup>-1</sup> ) | 0 (cm <sup>-1</sup> ) | -1 (cm <sup>-1</sup> ) |
|---------|---------|-------------------------|-----------------------|-----------------------|------------------------|
| S(0)    | T(1)    | 13.7048                 | 3.8278                | 12.5904               | 3.8278                 |
| S(0)    | T(2)    | 0.244                   | 0.1317                | 0.1577                | 0.1317                 |
| S(0)    | T(3)    | 5.6337                  | 1.7075                | 5.0899                | 1.7075                 |
| S(0)    | T(4)    | 2.1819                  | 0.8066                | 1.86                  | 0.8066                 |
| S(0)    | T(5)    | 8.6448                  | 3.509                 | 7.0786                | 3.509                  |
| S(0)    | T(6)    | 2.0252                  | 0.7817                | 1.6968                | 0.7817                 |
| S(0)    | T(7)    | 7.229                   | 3.5376                | 5.2181                | 3.5376                 |
| S(0)    | T(8)    | 3.0333                  | 2.1139                | 0.5134                | 2.1139                 |
| S(0)    | T(9)    | 42.5967                 | 15.611                | 36.429                | 15.611                 |
| S(0)    | T(10)   | 7.4777                  | 2.7472                | 6.3893                | 2.7472                 |
| S(1)    | T(1)    | 0.666                   | 0.0972                | 0.6516                | 0.0972                 |
| S(1)    | T(2)    | 0.2265                  | 0.1573                | 0.0424                | 0.1573                 |
| S(1)    | T(3)    | 0.28                    | 0.0265                | 0.2775                | 0.0265                 |
| S(1)    | T(4)    | 0.9086                  | 0.5595                | 0.4465                | 0.5595                 |
| S(1)    | T(5)    | 0.782                   | 0.4368                | 0.4796                | 0.4368                 |
| S(1)    | T(6)    | 0.593                   | 0.3016                | 0.412                 | 0.3016                 |
| S(1)    | T(7)    | 0.2943                  | 0.1445                | 0.2118                | 0.1445                 |
| S(1)    | T(8)    | 1.1504                  | 0.6796                | 0.6322                | 0.6796                 |
| S(1)    | T(9)    | 0.8628                  | 0.1517                | 0.8357                | 0.1517                 |
| S(1)    | T(10)   | 0.5597                  | 0.3088                | 0.3502                | 0.3088                 |
| S(2)    | T(1)    | 0.4081                  | 0.2869                | 0.0441                | 0.2869                 |
| S(2)    | T(2)    | 0.123                   | 0.0769                | 0.0575                | 0.0769                 |
| S(2)    | T(3)    | 0.1865                  | 0.1317                | 0.0108                | 0.1317                 |
| S(2)    | T(4)    | 0.5905                  | 0.3518                | 0.318                 | 0.3518                 |
| S(2)    | T(5)    | 0.3812                  | 0.1149                | 0.3449                | 0.1149                 |
| S(2)    | T(6)    | 0.8685                  | 0.3983                | 0.6611                | 0.3983                 |
| S(2)    | T(7)    | 1.2734                  | 0.8573                | 0.3894                | 0.8573                 |
| S(2)    | T(8)    | 0.309                   | 0.1966                | 0.1349                | 0.1966                 |
| S(2)    | T(9)    | 3.219                   | 2.2496                | 0.4904                | 2.2496                 |
| S(2)    | T(10)   | 0.7833                  | 0.508                 | 0.3123                | 0.508                  |
| S(3)    | T(1)    | 0.5012                  | 0.257                 | 0.3451                | 0.257                  |
| S(3)    | T(2)    | 0.135                   | 0.0914                | 0.039                 | 0.0914                 |
| S(3)    | T(3)    | 0.1362                  | 0.0258                | 0.1312                | 0.0258                 |
| S(3)    | T(4)    | 0.1588                  | 0.0968                | 0.0805                | 0.0968                 |
| S(3)    | T(5)    | 0.4339                  | 0.2582                | 0.2344                | 0.2582                 |
| S(3)    | T(6)    | 0.1501                  | 0.0812                | 0.0966                | 0.0812                 |
| S(3)    | T(7)    | 0.9919                  | 0.664                 | 0.3197                | 0.664                  |
| S(3)    | T(8)    | 0.1355                  | 0.0783                | 0.078                 | 0.0783                 |
| S(3)    | T(9)    | 0.8976                  | 0.6294                | 0.1156                | 0.6294                 |
| S(3)    | T(10)   | 0.218                   | 0.1431                | 0.0808                | 0.1431                 |
| S(4)    | T(1)    | 0.3703                  | 0.0646                | 0.3588                | 0.0646                 |
| S(4)    | T(2)    | 0.2335                  | 0.1464                | 0.1079                | 0.1464                 |

|      |       |        |        |        |        |
|------|-------|--------|--------|--------|--------|
| S(4) | T(3)  | 0.1926 | 0.0717 | 0.1638 | 0.0717 |
| S(4) | T(4)  | 0.082  | 0.0579 | 0.0041 | 0.0579 |
| S(4) | T(5)  | 0.6565 | 0.3639 | 0.4077 | 0.3639 |
| S(4) | T(6)  | 0.2272 | 0.1363 | 0.1204 | 0.1363 |
| S(4) | T(7)  | 0.3827 | 0.1788 | 0.2873 | 0.1788 |
| S(4) | T(8)  | 0.6167 | 0.4257 | 0.1333 | 0.4257 |
| S(4) | T(9)  | 0.2267 | 0.0873 | 0.1901 | 0.0873 |
| S(4) | T(10) | 0.2662 | 0.1862 | 0.0394 | 0.1862 |
| S(5) | T(1)  | 0.9084 | 0.5965 | 0.3368 | 0.5965 |
| S(5) | T(2)  | 0.4602 | 0.2854 | 0.2211 | 0.2854 |
| S(5) | T(3)  | 0.9472 | 0.4152 | 0.7433 | 0.4152 |
| S(5) | T(4)  | 0.0755 | 0.0496 | 0.0278 | 0.0496 |
| S(5) | T(5)  | 0.4237 | 0.2856 | 0.128  | 0.2856 |
| S(5) | T(6)  | 0.0891 | 0.0599 | 0.0277 | 0.0599 |
| S(5) | T(7)  | 0.4432 | 0.2474 | 0.272  | 0.2474 |
| S(5) | T(8)  | 0.2107 | 0.1482 | 0.0213 | 0.1482 |
| S(5) | T(9)  | 1.4257 | 0.8336 | 0.8018 | 0.8336 |
| S(5) | T(10) | 0.4752 | 0.336  | 0.0087 | 0.336  |
| S(6) | T(1)  | 0.7462 | 0.4392 | 0.4136 | 0.4392 |
| S(6) | T(2)  | 0.6154 | 0.3922 | 0.2668 | 0.3922 |
| S(6) | T(3)  | 0.3958 | 0.2702 | 0.1029 | 0.2702 |
| S(6) | T(4)  | 0.1498 | 0.0444 | 0.136  | 0.0444 |
| S(6) | T(5)  | 0.7173 | 0.1393 | 0.6897 | 0.1393 |
| S(6) | T(6)  | 0.1291 | 0.0376 | 0.1177 | 0.0376 |
| S(6) | T(7)  | 0.5112 | 0.2469 | 0.3733 | 0.2469 |
| S(6) | T(8)  | 0.0891 | 0.0576 | 0.0362 | 0.0576 |
| S(6) | T(9)  | 1.3883 | 0.5133 | 1.1833 | 0.5133 |
| S(6) | T(10) | 0.463  | 0.2206 | 0.3422 | 0.2206 |
| S(7) | T(1)  | 0.1747 | 0.0867 | 0.1244 | 0.0867 |
| S(7) | T(2)  | 0.8967 | 0.251  | 0.8235 | 0.251  |
| S(7) | T(3)  | 0.7244 | 0.4899 | 0.2117 | 0.4899 |
| S(7) | T(4)  | 0.2775 | 0.1632 | 0.1541 | 0.1632 |
| S(7) | T(5)  | 0.7688 | 0.4571 | 0.4162 | 0.4571 |
| S(7) | T(6)  | 0.1465 | 0.0911 | 0.0697 | 0.0911 |
| S(7) | T(7)  | 0.3924 | 0.2728 | 0.0718 | 0.2728 |
| S(7) | T(8)  | 0.2457 | 0.1535 | 0.1152 | 0.1535 |
| S(7) | T(9)  | 0.2756 | 0.1566 | 0.164  | 0.1566 |
| S(7) | T(10) | 0.2346 | 0.0824 | 0.2036 | 0.0824 |
| S(8) | T(1)  | 0.4506 | 0.3184 | 0.0174 | 0.3184 |
| S(8) | T(2)  | 0.6445 | 0.4329 | 0.2013 | 0.4329 |
| S(8) | T(3)  | 1.3078 | 0.6099 | 0.9831 | 0.6099 |
| S(8) | T(4)  | 0.1179 | 0.0822 | 0.0193 | 0.0822 |
| S(8) | T(5)  | 0.5185 | 0.3516 | 0.1467 | 0.3516 |

|       |       |        |        |        |        |
|-------|-------|--------|--------|--------|--------|
| S(8)  | T(6)  | 0.0691 | 0.0489 | 0.001  | 0.0489 |
| S(8)  | T(7)  | 0.3902 | 0.2083 | 0.2559 | 0.2083 |
| S(8)  | T(8)  | 0.2281 | 0.1606 | 0.0207 | 0.1606 |
| S(8)  | T(9)  | 0.3121 | 0.1548 | 0.2225 | 0.1548 |
| S(8)  | T(10) | 0.7068 | 0.3447 | 0.5119 | 0.3447 |
| S(9)  | T(1)  | 0.1669 | 0.1147 | 0.0392 | 0.1147 |
| S(9)  | T(2)  | 0.3128 | 0.1208 | 0.262  | 0.1208 |
| S(9)  | T(3)  | 0.1734 | 0.0833 | 0.1272 | 0.0833 |
| S(9)  | T(4)  | 0.179  | 0.099  | 0.1115 | 0.099  |
| S(9)  | T(5)  | 0.2443 | 0.1699 | 0.0442 | 0.1699 |
| S(9)  | T(6)  | 0.1024 | 0.0723 | 0.0054 | 0.0723 |
| S(9)  | T(7)  | 0.2506 | 0.1412 | 0.1515 | 0.1412 |
| S(9)  | T(8)  | 0.3927 | 0.1745 | 0.3055 | 0.1745 |
| S(9)  | T(9)  | 0.6877 | 0.334  | 0.4998 | 0.334  |
| S(9)  | T(10) | 0.0928 | 0.0613 | 0.0333 | 0.0613 |
| S(10) | T(1)  | 0.1095 | 0.0321 | 0.0996 | 0.0321 |
| S(10) | T(2)  | 0.1587 | 0.1122 | 0.0044 | 0.1122 |
| S(10) | T(3)  | 0.2121 | 0.1391 | 0.0793 | 0.1391 |
| S(10) | T(4)  | 0.0545 | 0.0237 | 0.043  | 0.0237 |
| S(10) | T(5)  | 0.1615 | 0.114  | 0.0096 | 0.114  |
| S(10) | T(6)  | 0.1847 | 0.1145 | 0.0888 | 0.1145 |
| S(10) | T(7)  | 0.2773 | 0.1403 | 0.1938 | 0.1403 |
| S(10) | T(8)  | 0.4176 | 0.2871 | 0.0979 | 0.2871 |
| S(10) | T(9)  | 0.5749 | 0.3745 | 0.2238 | 0.3745 |
| S(10) | T(10) | 0.7693 | 0.4056 | 0.5127 | 0.4056 |

Table S4: SOCME calculation result of **2CzSF<sub>5</sub>**

| Singlet | Triplet | RSS (cm <sup>-1</sup> ) | 1 (cm <sup>-1</sup> ) | 0 (cm <sup>-1</sup> ) | -1 (cm <sup>-1</sup> ) |
|---------|---------|-------------------------|-----------------------|-----------------------|------------------------|
| S(0)    | T(1)    | 2.8099                  | 0.0039                | 2.8099                | 0.0039                 |
| S(0)    | T(2)    | 0.237                   | 0.1675                | 0.0102                | 0.1675                 |
| S(0)    | T(3)    | 4.2317                  | 0.0053                | 4.2317                | 0.0053                 |
| S(0)    | T(4)    | 0.3345                  | 0.2365                | 0.0046                | 0.2365                 |
| S(0)    | T(5)    | 1.1157                  | 0.7889                | 0.0081                | 0.7889                 |
| S(0)    | T(6)    | 0.0077                  | 0.005                 | 0.0032                | 0.005                  |
| S(0)    | T(7)    | 3.9523                  | 2.7947                | 6.00E-04              | 2.7947                 |
| S(0)    | T(8)    | 2.0759                  | 0.0024                | 2.0759                | 0.0024                 |
| S(0)    | T(9)    | 1.163                   | 0.8223                | 0.0066                | 0.8223                 |
| S(0)    | T(10)   | 0.0107                  | 0.0075                | 0.0012                | 0.0075                 |
| S(1)    | T(1)    | 0.3971                  | 0.2808                | 0.002                 | 0.2808                 |
| S(1)    | T(2)    | 0.0016                  | 0.0011                | 2.00E-04              | 0.0011                 |
| S(1)    | T(3)    | 0.0036                  | 0.0025                | 8.00E-04              | 0.0025                 |
| S(1)    | T(4)    | 0.7808                  | 0.5521                | 0.0013                | 0.5521                 |
| S(1)    | T(5)    | 1.3515                  | 0.9557                | 0.0017                | 0.9557                 |

|      |       |          |          |          |          |
|------|-------|----------|----------|----------|----------|
| S(1) | T(6)  | 0.8662   | 0.0039   | 0.8662   | 0.0039   |
| S(1) | T(7)  | 0.0409   | 0.0289   | 0.0017   | 0.0289   |
| S(1) | T(8)  | 0.0014   | 0.001    | 2.00E-04 | 0.001    |
| S(1) | T(9)  | 0.6359   | 0.4496   | 0.002    | 0.4496   |
| S(1) | T(10) | 0.6021   | 0.001    | 0.6021   | 0.001    |
| S(2) | T(1)  | 0.3102   | 0.2193   | 1.00E-04 | 0.2193   |
| S(2) | T(2)  | 0.001    | 6.00E-04 | 4.00E-04 | 6.00E-04 |
| S(2) | T(3)  | 0.7608   | 0.538    | 0.0039   | 0.538    |
| S(2) | T(4)  | 0.0052   | 0.0036   | 0.001    | 0.0036   |
| S(2) | T(5)  | 0.8424   | 0.0023   | 0.8424   | 0.0023   |
| S(2) | T(6)  | 1.1551   | 0.8168   | 0.0018   | 0.8168   |
| S(2) | T(7)  | 0.0053   | 0.0037   | 3.00E-04 | 0.0037   |
| S(2) | T(8)  | 1.153    | 0.8153   | 0.0029   | 0.8153   |
| S(2) | T(9)  | 0.1873   | 0.0013   | 0.1873   | 0.0013   |
| S(2) | T(10) | 0.7827   | 0.5535   | 0.0011   | 0.5535   |
| S(3) | T(1)  | 0.1841   | 0.1302   | 0.0023   | 0.1302   |
| S(3) | T(2)  | 0.002    | 0.0014   | 1.00E-04 | 0.0014   |
| S(3) | T(3)  | 0.0613   | 0.0433   | 0.0018   | 0.0433   |
| S(3) | T(4)  | 0.0036   | 0.0025   | 3.00E-04 | 0.0025   |
| S(3) | T(5)  | 0.095    | 6.00E-04 | 0.095    | 6.00E-04 |
| S(3) | T(6)  | 0.3511   | 0.2483   | 0        | 0.2483   |
| S(3) | T(7)  | 0.0023   | 0.0016   | 0        | 0.0016   |
| S(3) | T(8)  | 0.6378   | 0.451    | 6.00E-04 | 0.451    |
| S(3) | T(9)  | 0.0316   | 9.00E-04 | 0.0316   | 9.00E-04 |
| S(3) | T(10) | 0.3061   | 0.2164   | 2.00E-04 | 0.2164   |
| S(4) | T(1)  | 0.0024   | 0.0017   | 1.00E-04 | 0.0017   |
| S(4) | T(2)  | 0.1289   | 0.0911   | 0.0024   | 0.0911   |
| S(4) | T(3)  | 0.0035   | 0.0025   | 1.00E-04 | 0.0025   |
| S(4) | T(4)  | 1.0551   | 0.7461   | 0.0041   | 0.7461   |
| S(4) | T(5)  | 0.2741   | 0.1938   | 4.00E-04 | 0.1938   |
| S(4) | T(6)  | 0.028    | 0.0032   | 0.0276   | 0.0032   |
| S(4) | T(7)  | 0.7499   | 0.5303   | 0.0021   | 0.5303   |
| S(4) | T(8)  | 8.00E-04 | 6.00E-04 | 2.00E-04 | 6.00E-04 |
| S(4) | T(9)  | 0.0554   | 0.0392   | 6.00E-04 | 0.0392   |
| S(4) | T(10) | 0.2053   | 4.00E-04 | 0.2052   | 4.00E-04 |
| S(5) | T(1)  | 0.3779   | 0.2671   | 0.0089   | 0.2671   |
| S(5) | T(2)  | 1.0336   | 0.0019   | 1.0335   | 0.0019   |
| S(5) | T(3)  | 0.2123   | 0.1502   | 0        | 0.1502   |
| S(5) | T(4)  | 0.0195   | 0.0017   | 0.0193   | 0.0017   |
| S(5) | T(5)  | 3.00E-04 | 2.00E-04 | 1.00E-04 | 2.00E-04 |
| S(5) | T(6)  | 0.0389   | 0.0275   | 0        | 0.0275   |
| S(5) | T(7)  | 0.0428   | 0.0011   | 0.0427   | 0.0011   |
| S(5) | T(8)  | 0.0076   | 0.0054   | 2.00E-04 | 0.0054   |

|       |       |          |          |          |          |
|-------|-------|----------|----------|----------|----------|
| S(5)  | T(9)  | 0.0023   | 0.0016   | 1.00E-04 | 0.0016   |
| S(5)  | T(10) | 0.2687   | 0.19     | 0.0014   | 0.19     |
| S(6)  | T(1)  | 1.2023   | 0.0021   | 1.2023   | 0.0021   |
| S(6)  | T(2)  | 0.4346   | 0.3073   | 0.0089   | 0.3073   |
| S(6)  | T(3)  | 0.1142   | 0.0013   | 0.1142   | 0.0013   |
| S(6)  | T(4)  | 0.045    | 0.0318   | 1.00E-04 | 0.0318   |
| S(6)  | T(5)  | 0.0631   | 0.0446   | 4.00E-04 | 0.0446   |
| S(6)  | T(6)  | 3.00E-04 | 2.00E-04 | 1.00E-04 | 2.00E-04 |
| S(6)  | T(7)  | 0.0537   | 0.038    | 2.00E-04 | 0.038    |
| S(6)  | T(8)  | 0.0678   | 3.00E-04 | 0.0678   | 3.00E-04 |
| S(6)  | T(9)  | 0.0539   | 0.0381   | 0.0012   | 0.0381   |
| S(6)  | T(10) | 0.0019   | 0.0014   | 1.00E-04 | 0.0014   |
| S(7)  | T(1)  | 4.463    | 3.1558   | 0.0043   | 3.1558   |
| S(7)  | T(2)  | 0.8934   | 0.0127   | 0.8932   | 0.0127   |
| S(7)  | T(3)  | 8.0005   | 5.6572   | 7.00E-04 | 5.6572   |
| S(7)  | T(4)  | 0.6151   | 0.0075   | 0.615    | 0.0075   |
| S(7)  | T(5)  | 0.0163   | 0.0115   | 0.0015   | 0.0115   |
| S(7)  | T(6)  | 0.7768   | 0.5493   | 4.00E-04 | 0.5493   |
| S(7)  | T(7)  | 0.7777   | 0.0013   | 0.7777   | 0.0013   |
| S(7)  | T(8)  | 2.2777   | 1.6106   | 8.00E-04 | 1.6106   |
| S(7)  | T(9)  | 3.00E-04 | 1.00E-04 | 2.00E-04 | 1.00E-04 |
| S(7)  | T(10) | 0.0234   | 0.0165   | 0.0015   | 0.0165   |
| S(8)  | T(1)  | 0.9139   | 0.0085   | 0.9139   | 0.0085   |
| S(8)  | T(2)  | 2.9272   | 2.0699   | 0.004    | 2.0699   |
| S(8)  | T(3)  | 0.3917   | 0.0059   | 0.3916   | 0.0059   |
| S(8)  | T(4)  | 8.3101   | 5.8761   | 9.00E-04 | 5.8761   |
| S(8)  | T(5)  | 1.2162   | 0.86     | 6.00E-04 | 0.86     |
| S(8)  | T(6)  | 0.0174   | 0.0123   | 0.0012   | 0.0123   |
| S(8)  | T(7)  | 3.0096   | 2.1281   | 0.0012   | 2.1281   |
| S(8)  | T(8)  | 0.8522   | 0.0037   | 0.8521   | 0.0037   |
| S(8)  | T(9)  | 0.0023   | 0.0016   | 6.00E-04 | 0.0016   |
| S(8)  | T(10) | 0.0019   | 0.0013   | 1.00E-04 | 0.0013   |
| S(9)  | T(1)  | 0.0958   | 0.0014   | 0.0958   | 0.0014   |
| S(9)  | T(2)  | 0.4319   | 0.3054   | 1.00E-04 | 0.3054   |
| S(9)  | T(3)  | 0.0076   | 8.00E-04 | 0.0076   | 8.00E-04 |
| S(9)  | T(4)  | 0.3902   | 0.2759   | 2.00E-04 | 0.2759   |
| S(9)  | T(5)  | 0.1179   | 0.0834   | 3.00E-04 | 0.0834   |
| S(9)  | T(6)  | 3.00E-04 | 2.00E-04 | 1.00E-04 | 2.00E-04 |
| S(9)  | T(7)  | 0.7244   | 0.5122   | 2.00E-04 | 0.5122   |
| S(9)  | T(8)  | 0.3023   | 0.001    | 0.3023   | 0.001    |
| S(9)  | T(9)  | 0.4466   | 0.3158   | 0.0037   | 0.3158   |
| S(9)  | T(10) | 0.0026   | 0.0019   | 0        | 0.0019   |
| S(10) | T(1)  | 0.3948   | 0.2792   | 4.00E-04 | 0.2792   |

|       |       |          |          |          |          |
|-------|-------|----------|----------|----------|----------|
| S(10) | T(2)  | 0.0556   | 0.0014   | 0.0556   | 0.0014   |
| S(10) | T(3)  | 0.1594   | 0.1127   | 4.00E-04 | 0.1127   |
| S(10) | T(4)  | 0.1527   | 3.00E-04 | 0.1527   | 3.00E-04 |
| S(10) | T(5)  | 5.00E-04 | 2.00E-04 | 3.00E-04 | 2.00E-04 |
| S(10) | T(6)  | 0.0559   | 0.0395   | 0.0013   | 0.0395   |
| S(10) | T(7)  | 0.5846   | 0.001    | 0.5846   | 0.001    |
| S(10) | T(8)  | 0.5449   | 0.3853   | 4.00E-04 | 0.3853   |
| S(10) | T(9)  | 0.0023   | 0.0016   | 1.00E-04 | 0.0016   |
| S(10) | T(10) | 0.3829   | 0.2708   | 0.0029   | 0.2708   |

Table S5: SOCME calculation result of **2CzBN**

| Singlet | Triplet | RSS (cm <sup>-1</sup> ) | 1 (cm <sup>-1</sup> ) | 0 (cm <sup>-1</sup> ) | -1 (cm <sup>-1</sup> ) |
|---------|---------|-------------------------|-----------------------|-----------------------|------------------------|
| S(0)    | T(1)    | 0.6285                  | 0.4444                | 0.0035                | 0.4444                 |
| S(0)    | T(2)    | 2.6871                  | 8.00E-04              | 2.6871                | 8.00E-04               |
| S(0)    | T(3)    | 0.131                   | 1.00E-04              | 0.131                 | 1.00E-04               |
| S(0)    | T(4)    | 0.0379                  | 0.0268                | 1.00E-04              | 0.0268                 |
| S(0)    | T(5)    | 1.2199                  | 5.00E-04              | 1.2199                | 5.00E-04               |
| S(0)    | T(6)    | 0.6441                  | 0.4554                | 0                     | 0.4554                 |
| S(0)    | T(7)    | 0.9586                  | 2.00E-04              | 0.9586                | 2.00E-04               |
| S(0)    | T(8)    | 0.1753                  | 3.00E-04              | 0.1753                | 3.00E-04               |
| S(0)    | T(9)    | 0.5748                  | 0.4064                | 1.00E-04              | 0.4064                 |
| S(0)    | T(10)   | 3.2827                  | 2.3213                | 1.00E-04              | 2.3213                 |
| S(1)    | T(1)    | 0.0812                  | 0.0011                | 0.0812                | 0.0011                 |
| S(1)    | T(2)    | 1.0537                  | 0.7451                | 2.00E-04              | 0.7451                 |
| S(1)    | T(3)    | 0.2025                  | 0.1432                | 2.00E-04              | 0.1432                 |
| S(1)    | T(4)    | 0.1608                  | 2.00E-04              | 0.1608                | 2.00E-04               |
| S(1)    | T(5)    | 0.5507                  | 0.3894                | 1.00E-04              | 0.3894                 |
| S(1)    | T(6)    | 0.5181                  | 0                     | 0.5181                | 0                      |
| S(1)    | T(7)    | 0.5018                  | 0.3548                | 1.00E-04              | 0.3548                 |
| S(1)    | T(8)    | 0.2086                  | 0.1475                | 3.00E-04              | 0.1475                 |
| S(1)    | T(9)    | 0.4048                  | 1.00E-04              | 0.4048                | 1.00E-04               |
| S(1)    | T(10)   | 0.088                   | 1.00E-04              | 0.088                 | 1.00E-04               |
| S(2)    | T(1)    | 0.7586                  | 0.5364                | 1.00E-04              | 0.5364                 |
| S(2)    | T(2)    | 0.0273                  | 8.00E-04              | 0.0273                | 8.00E-04               |
| S(2)    | T(3)    | 0.1916                  | 1.00E-04              | 0.1915                | 1.00E-04               |
| S(2)    | T(4)    | 0.1694                  | 0.1198                | 3.00E-04              | 0.1198                 |
| S(2)    | T(5)    | 0.3065                  | 1.00E-04              | 0.3065                | 1.00E-04               |
| S(2)    | T(6)    | 0.3614                  | 0.2555                | 3.00E-04              | 0.2555                 |
| S(2)    | T(7)    | 0.3982                  | 1.00E-04              | 0.3982                | 1.00E-04               |
| S(2)    | T(8)    | 0.4199                  | 2.00E-04              | 0.4199                | 2.00E-04               |
| S(2)    | T(9)    | 0.3843                  | 0.2718                | 3.00E-04              | 0.2718                 |
| S(2)    | T(10)   | 0.7969                  | 0.5635                | 0                     | 0.5635                 |
| S(3)    | T(1)    | 0.199                   | 0.1407                | 0.0029                | 0.1407                 |

|      |       |        |          |          |          |
|------|-------|--------|----------|----------|----------|
| S(3) | T(2)  | 0.5613 | 8.00E-04 | 0.5613   | 8.00E-04 |
| S(3) | T(3)  | 0.4909 | 5.00E-04 | 0.4909   | 5.00E-04 |
| S(3) | T(4)  | 0.206  | 0.1457   | 0.0027   | 0.1457   |
| S(3) | T(5)  | 0.0638 | 4.00E-04 | 0.0638   | 4.00E-04 |
| S(3) | T(6)  | 0.0479 | 0.0339   | 1.00E-04 | 0.0339   |
| S(3) | T(7)  | 0.0353 | 4.00E-04 | 0.0353   | 4.00E-04 |
| S(3) | T(8)  | 0.1326 | 3.00E-04 | 0.1326   | 3.00E-04 |
| S(3) | T(9)  | 0.0326 | 0.023    | 4.00E-04 | 0.023    |
| S(3) | T(10) | 0.0113 | 0.008    | 3.00E-04 | 0.008    |
| S(4) | T(1)  | 0.4376 | 4.00E-04 | 0.4376   | 4.00E-04 |
| S(4) | T(2)  | 0.3117 | 0.2204   | 0.0033   | 0.2204   |
| S(4) | T(3)  | 0.1946 | 0.1376   | 0.0027   | 0.1376   |
| S(4) | T(4)  | 0.4954 | 5.00E-04 | 0.4954   | 5.00E-04 |
| S(4) | T(5)  | 0.1315 | 0.093    | 3.00E-04 | 0.093    |
| S(4) | T(6)  | 0.0125 | 2.00E-04 | 0.0125   | 2.00E-04 |
| S(4) | T(7)  | 0.1165 | 0.0824   | 2.00E-04 | 0.0824   |
| S(4) | T(8)  | 0.0954 | 0.0675   | 6.00E-04 | 0.0675   |
| S(4) | T(9)  | 0.1072 | 1.00E-04 | 0.1072   | 1.00E-04 |
| S(4) | T(10) | 0.0592 | 0        | 0.0592   | 0        |
| S(5) | T(1)  | 0.0924 | 9.00E-04 | 0.0924   | 9.00E-04 |
| S(5) | T(2)  | 0.8152 | 0.5764   | 1.00E-04 | 0.5764   |
| S(5) | T(3)  | 0.211  | 0.1492   | 0        | 0.1492   |
| S(5) | T(4)  | 0.0769 | 2.00E-04 | 0.0769   | 2.00E-04 |
| S(5) | T(5)  | 0.5232 | 0.37     | 0        | 0.37     |
| S(5) | T(6)  | 0.0012 | 0        | 0.0012   | 0        |
| S(5) | T(7)  | 0.4642 | 0.3282   | 0        | 0.3282   |
| S(5) | T(8)  | 0.0557 | 0.0394   | 0        | 0.0394   |
| S(5) | T(9)  | 0.049  | 0        | 0.049    | 0        |
| S(5) | T(10) | 0.0116 | 1.00E-04 | 0.0116   | 1.00E-04 |
| S(6) | T(1)  | 0.5698 | 0.4029   | 3.00E-04 | 0.4029   |
| S(6) | T(2)  | 0.1746 | 7.00E-04 | 0.1746   | 7.00E-04 |
| S(6) | T(3)  | 0.1052 | 1.00E-04 | 0.1052   | 1.00E-04 |
| S(6) | T(4)  | 0.1471 | 0.104    | 1.00E-04 | 0.104    |
| S(6) | T(5)  | 0.2221 | 0        | 0.2221   | 0        |
| S(6) | T(6)  | 0.1228 | 0.0869   | 0        | 0.0869   |
| S(6) | T(7)  | 0.1637 | 0        | 0.1637   | 0        |
| S(6) | T(8)  | 0.098  | 0        | 0.0979   | 0        |
| S(6) | T(9)  | 0.0275 | 0.0194   | 0        | 0.0194   |
| S(6) | T(10) | 1.096  | 0.775    | 0        | 0.775    |
| S(7) | T(1)  | 0.6214 | 1.00E-04 | 0.6214   | 1.00E-04 |
| S(7) | T(2)  | 0.2024 | 0.1431   | 0.0012   | 0.1431   |
| S(7) | T(3)  | 0.6693 | 0.4733   | 0.001    | 0.4733   |
| S(7) | T(4)  | 0.7565 | 4.00E-04 | 0.7565   | 4.00E-04 |

|       |       |        |          |          |          |
|-------|-------|--------|----------|----------|----------|
| S(7)  | T(5)  | 0.2701 | 0.191    | 0        | 0.191    |
| S(7)  | T(6)  | 0.0777 | 0        | 0.0777   | 0        |
| S(7)  | T(7)  | 0.1968 | 0.1392   | 0        | 0.1392   |
| S(7)  | T(8)  | 0.2967 | 0.2098   | 0        | 0.2098   |
| S(7)  | T(9)  | 0.0697 | 2.00E-04 | 0.0697   | 2.00E-04 |
| S(7)  | T(10) | 0.1133 | 0        | 0.1133   | 0        |
| S(8)  | T(1)  | 0.1182 | 2.00E-04 | 0.1182   | 2.00E-04 |
| S(8)  | T(2)  | 0.0664 | 0.0469   | 1.00E-04 | 0.0469   |
| S(8)  | T(3)  | 0.2611 | 0.1847   | 5.00E-04 | 0.1847   |
| S(8)  | T(4)  | 0.0985 | 0.001    | 0.0984   | 0.001    |
| S(8)  | T(5)  | 0.171  | 0.1209   | 0.0014   | 0.1209   |
| S(8)  | T(6)  | 0.1174 | 3.00E-04 | 0.1174   | 3.00E-04 |
| S(8)  | T(7)  | 0.0985 | 0.0697   | 6.00E-04 | 0.0697   |
| S(8)  | T(8)  | 0.7254 | 0.5129   | 3.00E-04 | 0.5129   |
| S(8)  | T(9)  | 0.0338 | 0.0017   | 0.0337   | 0.0017   |
| S(8)  | T(10) | 0.4559 | 9.00E-04 | 0.4559   | 9.00E-04 |
| S(9)  | T(1)  | 0.0543 | 0.0384   | 5.00E-04 | 0.0384   |
| S(9)  | T(2)  | 0.0183 | 2.00E-04 | 0.0183   | 2.00E-04 |
| S(9)  | T(3)  | 0.1195 | 9.00E-04 | 0.1195   | 9.00E-04 |
| S(9)  | T(4)  | 0.3453 | 0.2442   | 4.00E-04 | 0.2442   |
| S(9)  | T(5)  | 0.372  | 4.00E-04 | 0.372    | 4.00E-04 |
| S(9)  | T(6)  | 0.1135 | 0.0803   | 5.00E-04 | 0.0803   |
| S(9)  | T(7)  | 0.1607 | 2.00E-04 | 0.1607   | 2.00E-04 |
| S(9)  | T(8)  | 0.0596 | 0.0016   | 0.0596   | 0.0016   |
| S(9)  | T(9)  | 0.7692 | 0.5439   | 1.00E-04 | 0.5439   |
| S(9)  | T(10) | 0.3645 | 0.2577   | 0.0018   | 0.2577   |
| S(10) | T(1)  | 0.1539 | 0.1088   | 0.001    | 0.1088   |
| S(10) | T(2)  | 0.5472 | 1.00E-04 | 0.5472   | 1.00E-04 |
| S(10) | T(3)  | 0.7613 | 4.00E-04 | 0.7613   | 4.00E-04 |
| S(10) | T(4)  | 0.6521 | 0.4611   | 0.0011   | 0.4611   |
| S(10) | T(5)  | 0.1494 | 1.00E-04 | 0.1494   | 1.00E-04 |
| S(10) | T(6)  | 0.061  | 0.0431   | 1.00E-04 | 0.0431   |
| S(10) | T(7)  | 0.0588 | 1.00E-04 | 0.0588   | 1.00E-04 |
| S(10) | T(8)  | 0.0253 | 2.00E-04 | 0.0253   | 2.00E-04 |
| S(10) | T(9)  | 0.1152 | 0.0815   | 0        | 0.0815   |
| S(10) | T(10) | 0.1972 | 0.1394   | 0        | 0.1394   |

Table S6: SOCME calculation result of 2CzBP

| Singlet | Triplet | RSS (cm <sup>-1</sup> ) | 1 (cm <sup>-1</sup> ) | 0 (cm <sup>-1</sup> ) | -1 (cm <sup>-1</sup> ) |
|---------|---------|-------------------------|-----------------------|-----------------------|------------------------|
| S(0)    | T(1)    | 13.1249                 | 6.3559                | 9.5639                | 6.3559                 |
| S(0)    | T(2)    | 34.7575                 | 16.1469               | 26.2038               | 16.1469                |
| S(0)    | T(3)    | 22.8901                 | 10.4107               | 17.5268               | 10.4107                |
| S(0)    | T(4)    | 6.7829                  | 3.2294                | 5.015                 | 3.2294                 |



|      |       |        |        |        |        |
|------|-------|--------|--------|--------|--------|
| S(0) | T(5)  | 1.6684 | 0.9608 | 0.9682 | 0.9608 |
| S(0) | T(6)  | 9.4395 | 4.6461 | 6.7772 | 4.6461 |
| S(0) | T(7)  | 0.5546 | 0.1733 | 0.4975 | 0.1733 |
| S(0) | T(8)  | 4.0372 | 1.7446 | 3.1955 | 1.7446 |
| S(0) | T(9)  | 2.7755 | 1.6016 | 1.604  | 1.6016 |
| S(0) | T(10) | 0.4819 | 0.1836 | 0.4059 | 0.1836 |
| S(1) | T(1)  | 0.4592 | 0.2883 | 0.2113 | 0.2883 |
| S(1) | T(2)  | 2.7381 | 1.447  | 1.8193 | 1.447  |
| S(1) | T(3)  | 0.965  | 0.3536 | 0.8253 | 0.3536 |
| S(1) | T(4)  | 0.5293 | 0.2607 | 0.3797 | 0.2607 |
| S(1) | T(5)  | 0.3463 | 0.1891 | 0.2199 | 0.1891 |
| S(1) | T(6)  | 0.809  | 0.4472 | 0.5045 | 0.4472 |
| S(1) | T(7)  | 0.4524 | 0.2847 | 0.2064 | 0.2847 |
| S(1) | T(8)  | 0.158  | 0.0513 | 0.1403 | 0.0513 |
| S(1) | T(9)  | 0.3273 | 0.1753 | 0.2137 | 0.1753 |
| S(1) | T(10) | 0.7591 | 0.2686 | 0.6572 | 0.2686 |
| S(2) | T(1)  | 1.97   | 1.0858 | 1.2341 | 1.0858 |
| S(2) | T(2)  | 1.7896 | 1.1825 | 0.6371 | 1.1825 |
| S(2) | T(3)  | 2.377  | 1.6055 | 0.7037 | 1.6055 |
| S(2) | T(4)  | 0.4536 | 0.2296 | 0.3167 | 0.2296 |
| S(2) | T(5)  | 0.9426 | 0.584  | 0.4541 | 0.584  |
| S(2) | T(6)  | 2.4926 | 1.2663 | 1.7338 | 1.2663 |
| S(2) | T(7)  | 0.2194 | 0.1545 | 0.0188 | 0.1545 |
| S(2) | T(8)  | 0.4243 | 0.2871 | 0.1235 | 0.2871 |
| S(2) | T(9)  | 0.1818 | 0.1029 | 0.1089 | 0.1029 |
| S(2) | T(10) | 2.1086 | 1.2346 | 1.1822 | 1.2346 |
| S(3) | T(1)  | 1.0726 | 0.7114 | 0.3716 | 0.7114 |
| S(3) | T(2)  | 0.6142 | 0.4328 | 0.0516 | 0.4328 |
| S(3) | T(3)  | 0.4496 | 0.2512 | 0.2757 | 0.2512 |
| S(3) | T(4)  | 0.7    | 0.3427 | 0.5051 | 0.3427 |
| S(3) | T(5)  | 0.7189 | 0.3695 | 0.4938 | 0.3695 |
| S(3) | T(6)  | 2.1057 | 1.0395 | 1.5076 | 1.0395 |
| S(3) | T(7)  | 0.1186 | 0.083  | 0.0167 | 0.083  |
| S(3) | T(8)  | 0.6052 | 0.2701 | 0.4695 | 0.2701 |
| S(3) | T(9)  | 0.0754 | 0.0529 | 0.0098 | 0.0529 |
| S(3) | T(10) | 1.0683 | 0.5793 | 0.6856 | 0.5793 |
| S(4) | T(1)  | 0.2164 | 0.0582 | 0.2001 | 0.0582 |
| S(4) | T(2)  | 0.632  | 0.4236 | 0.2014 | 0.4236 |
| S(4) | T(3)  | 1.0318 | 0.5759 | 0.6336 | 0.5759 |
| S(4) | T(4)  | 0.0416 | 0.0292 | 0.0058 | 0.0292 |
| S(4) | T(5)  | 0.2272 | 0.0981 | 0.18   | 0.0981 |
| S(4) | T(6)  | 0.6697 | 0.3057 | 0.5114 | 0.3057 |
| S(4) | T(7)  | 0.0787 | 0.0552 | 0.0099 | 0.0552 |

|      |       |         |        |        |        |
|------|-------|---------|--------|--------|--------|
| S(4) | T(8)  | 0.112   | 0.0314 | 0.1028 | 0.0314 |
| S(4) | T(9)  | 0.0632  | 0.0438 | 0.0127 | 0.0438 |
| S(4) | T(10) | 0.3156  | 0.1881 | 0.1697 | 0.1881 |
| S(5) | T(1)  | 4.1099  | 1.8538 | 3.1652 | 1.8538 |
| S(5) | T(2)  | 4.3695  | 1.7924 | 3.5591 | 1.7924 |
| S(5) | T(3)  | 6.438   | 3.644  | 3.859  | 3.644  |
| S(5) | T(4)  | 2.1236  | 1.1011 | 1.4439 | 1.1011 |
| S(5) | T(5)  | 4.2026  | 2.2522 | 2.7417 | 2.2522 |
| S(5) | T(6)  | 11.2293 | 5.7839 | 7.6936 | 5.7839 |
| S(5) | T(7)  | 0.8209  | 0.5805 | 0.0039 | 0.5805 |
| S(5) | T(8)  | 2.886   | 1.412  | 2.0837 | 1.412  |
| S(5) | T(9)  | 0.6721  | 0.3624 | 0.4348 | 0.3624 |
| S(5) | T(10) | 6.3616  | 3.4792 | 4.0323 | 3.4792 |
| S(6) | T(1)  | 0.8795  | 0.5212 | 0.4798 | 0.5212 |
| S(6) | T(2)  | 0.4844  | 0.2445 | 0.3393 | 0.2445 |
| S(6) | T(3)  | 0.2419  | 0.0787 | 0.2148 | 0.0787 |
| S(6) | T(4)  | 0.1381  | 0.0861 | 0.0652 | 0.0861 |
| S(6) | T(5)  | 0.0274  | 0.0181 | 0.0097 | 0.0181 |
| S(6) | T(6)  | 0.1094  | 0.0704 | 0.0451 | 0.0704 |
| S(6) | T(7)  | 0.314   | 0.2036 | 0.1252 | 0.2036 |
| S(6) | T(8)  | 0.0961  | 0.0675 | 0.0115 | 0.0675 |
| S(6) | T(9)  | 0.1219  | 0.0815 | 0.0395 | 0.0815 |
| S(6) | T(10) | 0.4668  | 0.3202 | 0.1129 | 0.3202 |
| S(7) | T(1)  | 2.7453  | 1.9409 | 0.0484 | 1.9409 |
| S(7) | T(2)  | 0.7519  | 0.5301 | 0.0579 | 0.5301 |
| S(7) | T(3)  | 0.2293  | 0.16   | 0.0368 | 0.16   |
| S(7) | T(4)  | 0.4157  | 0.1397 | 0.3658 | 0.1397 |
| S(7) | T(5)  | 0.1215  | 0.0672 | 0.0757 | 0.0672 |
| S(7) | T(6)  | 0.211   | 0.0746 | 0.1827 | 0.0746 |
| S(7) | T(7)  | 0.6144  | 0.4311 | 0.0759 | 0.4311 |
| S(7) | T(8)  | 0.3741  | 0.2635 | 0.0323 | 0.2635 |
| S(7) | T(9)  | 0.3382  | 0.1607 | 0.2504 | 0.1607 |
| S(7) | T(10) | 0.8036  | 0.4719 | 0.4478 | 0.4719 |
| S(8) | T(1)  | 1.1772  | 0.8014 | 0.3186 | 0.8014 |
| S(8) | T(2)  | 1.0789  | 0.7578 | 0.125  | 0.7578 |
| S(8) | T(3)  | 0.739   | 0.4702 | 0.3224 | 0.4702 |
| S(8) | T(4)  | 0.2102  | 0.1398 | 0.0716 | 0.1398 |
| S(8) | T(5)  | 0.3847  | 0.1971 | 0.2651 | 0.1971 |
| S(8) | T(6)  | 0.4402  | 0.2599 | 0.2424 | 0.2599 |
| S(8) | T(7)  | 0.1235  | 0.0869 | 0.0122 | 0.0869 |
| S(8) | T(8)  | 0.3553  | 0.2473 | 0.0622 | 0.2473 |
| S(8) | T(9)  | 0.0963  | 0.0526 | 0.0612 | 0.0526 |
| S(8) | T(10) | 0.3078  | 0.1888 | 0.1532 | 0.1888 |

|       |       |        |        |        |        |
|-------|-------|--------|--------|--------|--------|
| S(9)  | T(1)  | 0.2211 | 0.1325 | 0.1173 | 0.1325 |
| S(9)  | T(2)  | 1.1514 | 0.6937 | 0.6026 | 0.6937 |
| S(9)  | T(3)  | 0.0747 | 0.0521 | 0.0119 | 0.0521 |
| S(9)  | T(4)  | 0.1404 | 0.0992 | 0.0052 | 0.0992 |
| S(9)  | T(5)  | 1.1307 | 0.7873 | 0.1974 | 0.7873 |
| S(9)  | T(6)  | 0.4355 | 0.3045 | 0.0642 | 0.3045 |
| S(9)  | T(7)  | 0.1119 | 0.0758 | 0.0319 | 0.0758 |
| S(9)  | T(8)  | 0.1455 | 0.1016 | 0.0226 | 0.1016 |
| S(9)  | T(9)  | 0.0769 | 0.0517 | 0.0236 | 0.0517 |
| S(9)  | T(10) | 0.2582 | 0.1824 | 0.0101 | 0.1824 |
| S(10) | T(1)  | 1.3057 | 0.9135 | 0.1891 | 0.9135 |
| S(10) | T(2)  | 1.3174 | 0.9145 | 0.2509 | 0.9145 |
| S(10) | T(3)  | 0.8781 | 0.5615 | 0.3746 | 0.5615 |
| S(10) | T(4)  | 0.65   | 0.284  | 0.5111 | 0.284  |
| S(10) | T(5)  | 0.1276 | 0.0703 | 0.0799 | 0.0703 |
| S(10) | T(6)  | 0.2574 | 0.1788 | 0.0479 | 0.1788 |
| S(10) | T(7)  | 0.4425 | 0.311  | 0.0492 | 0.311  |
| S(10) | T(8)  | 0.3304 | 0.212  | 0.139  | 0.212  |
| S(10) | T(9)  | 0.5598 | 0.3291 | 0.3112 | 0.3291 |
| S(10) | T(10) | 0.1668 | 0.1001 | 0.0883 | 0.1001 |

Table S7: SOCME calculation result of **2CzTRZ**

| Singlet | Triplet | RSS (cm <sup>-1</sup> ) | 1 (cm <sup>-1</sup> ) | 0 (cm <sup>-1</sup> ) | -1 (cm <sup>-1</sup> ) |
|---------|---------|-------------------------|-----------------------|-----------------------|------------------------|
| S(0)    | T(1)    | 1.5391                  | 1.0883                | 1.00E-04              | 1.0883                 |
| S(0)    | T(2)    | 0.7038                  | 0.4575                | 0.277                 | 0.4575                 |
| S(0)    | T(3)    | 0.6699                  | 0.4737                | 0.001                 | 0.4737                 |
| S(0)    | T(4)    | 0.1164                  | 0.0813                | 0.0179                | 0.0813                 |
| S(0)    | T(5)    | 0.5943                  | 0.4137                | 0.104                 | 0.4137                 |
| S(0)    | T(6)    | 0.0136                  | 0.0094                | 0.0033                | 0.0094                 |
| S(0)    | T(7)    | 1.2788                  | 0.9043                | 0.0011                | 0.9043                 |
| S(0)    | T(8)    | 0.6964                  | 0.4766                | 0.1752                | 0.4766                 |
| S(0)    | T(9)    | 0.1998                  | 0.1393                | 0.0332                | 0.1393                 |
| S(0)    | T(10)   | 0.9976                  | 0.5944                | 0.5373                | 0.5944                 |
| S(1)    | T(1)    | 0.0307                  | 0.0217                | 6.00E-04              | 0.0217                 |
| S(1)    | T(2)    | 0.9287                  | 0.1747                | 0.8952                | 0.1747                 |
| S(1)    | T(3)    | 0.0728                  | 0.0515                | 0.0025                | 0.0515                 |
| S(1)    | T(4)    | 0.7351                  | 0.0554                | 0.7309                | 0.0554                 |
| S(1)    | T(5)    | 0.2253                  | 0.1454                | 0.0923                | 0.1454                 |
| S(1)    | T(6)    | 0.2682                  | 0.1897                | 0.0018                | 0.1897                 |
| S(1)    | T(7)    | 0.0148                  | 0.0104                | 6.00E-04              | 0.0104                 |
| S(1)    | T(8)    | 0.1165                  | 0.0383                | 0.1032                | 0.0383                 |
| S(1)    | T(9)    | 0.1271                  | 0.086                 | 0.0366                | 0.086                  |
| S(1)    | T(10)   | 0.6239                  | 0.1354                | 0.5937                | 0.1354                 |

|      |       |        |        |          |        |
|------|-------|--------|--------|----------|--------|
| S(2) | T(1)  | 1.0682 | 0.3345 | 0.9577   | 0.3345 |
| S(2) | T(2)  | 0.0654 | 0.0463 | 0.0011   | 0.0463 |
| S(2) | T(3)  | 0.4138 | 0.0144 | 0.4133   | 0.0144 |
| S(2) | T(4)  | 0.0462 | 0.0327 | 0.0022   | 0.0327 |
| S(2) | T(5)  | 0.2386 | 0.1687 | 0.0017   | 0.1687 |
| S(2) | T(6)  | 0.298  | 0.2006 | 0.0909   | 0.2006 |
| S(2) | T(7)  | 0.4667 | 0.009  | 0.4665   | 0.009  |
| S(2) | T(8)  | 0.0562 | 0.0398 | 5.00E-04 | 0.0398 |
| S(2) | T(9)  | 0.0524 | 0.0168 | 0.0467   | 0.0168 |
| S(2) | T(10) | 0.1275 | 0.0901 | 0.0031   | 0.0901 |
| S(3) | T(1)  | 0.8122 | 0.0727 | 0.8056   | 0.0727 |
| S(3) | T(2)  | 0.0152 | 0.0107 | 0.0013   | 0.0107 |
| S(3) | T(3)  | 0.5167 | 0.0698 | 0.5072   | 0.0698 |
| S(3) | T(4)  | 0.0425 | 0.03   | 0.0024   | 0.03   |
| S(3) | T(5)  | 0.1623 | 0.1148 | 0.0011   | 0.1148 |
| S(3) | T(6)  | 0.0974 | 0.0171 | 0.0943   | 0.0171 |
| S(3) | T(7)  | 0.8112 | 0.2594 | 0.7235   | 0.2594 |
| S(3) | T(8)  | 0.1487 | 0.1051 | 2.00E-04 | 0.1051 |
| S(3) | T(9)  | 0.1519 | 0.1024 | 0.0459   | 0.1024 |
| S(3) | T(10) | 0.0103 | 0.007  | 0.0031   | 0.007  |
| S(4) | T(1)  | 0.0063 | 0.0045 | 4.00E-04 | 0.0045 |
| S(4) | T(2)  | 0.6465 | 0.0146 | 0.6462   | 0.0146 |
| S(4) | T(3)  | 0.0487 | 0.0344 | 0.0031   | 0.0344 |
| S(4) | T(4)  | 0.9242 | 0.2523 | 0.8525   | 0.2523 |
| S(4) | T(5)  | 0.2599 | 0.0234 | 0.2578   | 0.0234 |
| S(4) | T(6)  | 0.1937 | 0.1369 | 0.0049   | 0.1369 |
| S(4) | T(7)  | 0.0319 | 0.0226 | 5.00E-04 | 0.0226 |
| S(4) | T(8)  | 0.3457 | 0.2421 | 0.0471   | 0.2421 |
| S(4) | T(9)  | 0.0344 | 0.0195 | 0.0204   | 0.0195 |
| S(4) | T(10) | 0.3994 | 0.1555 | 0.3333   | 0.1555 |
| S(5) | T(1)  | 0.3364 | 0.1952 | 0.1921   | 0.1952 |
| S(5) | T(2)  | 0.4303 | 0.3043 | 0.0027   | 0.3043 |
| S(5) | T(3)  | 0.2689 | 0.1566 | 0.1525   | 0.1566 |
| S(5) | T(4)  | 0.1334 | 0.0943 | 0.0013   | 0.0943 |
| S(5) | T(5)  | 0.1621 | 0.1146 | 0.002    | 0.1146 |
| S(5) | T(6)  | 0.1275 | 0.0892 | 0.0179   | 0.0892 |
| S(5) | T(7)  | 0.0681 | 0.0379 | 0.042    | 0.0379 |
| S(5) | T(8)  | 0.2843 | 0.201  | 8.00E-04 | 0.201  |
| S(5) | T(9)  | 0.0305 | 0.0215 | 8.00E-04 | 0.0215 |
| S(5) | T(10) | 0.0376 | 0.0266 | 8.00E-04 | 0.0266 |
| S(6) | T(1)  | 0.4567 | 0.3229 | 0.0024   | 0.3229 |
| S(6) | T(2)  | 0.4441 | 0.2813 | 0.1974   | 0.2813 |
| S(6) | T(3)  | 0.0082 | 0.0057 | 0.0016   | 0.0057 |

|       |       |        |        |          |        |
|-------|-------|--------|--------|----------|--------|
| S(6)  | T(4)  | 0.1509 | 0.0839 | 0.0932   | 0.0839 |
| S(6)  | T(5)  | 0.2158 | 0.1022 | 0.1603   | 0.1022 |
| S(6)  | T(6)  | 0.2019 | 0.1427 | 0.0033   | 0.1427 |
| S(6)  | T(7)  | 0.1774 | 0.1255 | 5.00E-04 | 0.1255 |
| S(6)  | T(8)  | 0.1938 | 0.1196 | 0.0945   | 0.1196 |
| S(6)  | T(9)  | 0.0287 | 0.0201 | 0.0045   | 0.0201 |
| S(6)  | T(10) | 0.1346 | 0.0793 | 0.0745   | 0.0793 |
| S(7)  | T(1)  | 0.174  | 0.1231 | 0.001    | 0.1231 |
| S(7)  | T(2)  | 0.1114 | 0.0756 | 0.031    | 0.0756 |
| S(7)  | T(3)  | 0.1162 | 0.0821 | 1.00E-04 | 0.0821 |
| S(7)  | T(4)  | 0.3832 | 0.206  | 0.2489   | 0.206  |
| S(7)  | T(5)  | 0.2771 | 0.0033 | 0.2771   | 0.0033 |
| S(7)  | T(6)  | 0.1521 | 0.1076 | 6.00E-04 | 0.1076 |
| S(7)  | T(7)  | 0.5648 | 0.3993 | 0.0037   | 0.3993 |
| S(7)  | T(8)  | 0.2785 | 0.0887 | 0.2487   | 0.0887 |
| S(7)  | T(9)  | 0.1753 | 0.1239 | 0.005    | 0.1239 |
| S(7)  | T(10) | 0.1305 | 0.073  | 0.0798   | 0.073  |
| S(8)  | T(1)  | 0.0893 | 0.0383 | 0.0711   | 0.0383 |
| S(8)  | T(2)  | 0.1108 | 0.0783 | 3.00E-04 | 0.0783 |
| S(8)  | T(3)  | 0.3037 | 0.214  | 0.0246   | 0.214  |
| S(8)  | T(4)  | 0.4542 | 0.3211 | 0.0037   | 0.3211 |
| S(8)  | T(5)  | 0.1397 | 0.0987 | 0.0033   | 0.0987 |
| S(8)  | T(6)  | 0.3615 | 0.0729 | 0.3465   | 0.0729 |
| S(8)  | T(7)  | 0.3167 | 0.1642 | 0.2155   | 0.1642 |
| S(8)  | T(8)  | 0.0133 | 0.0091 | 0.0036   | 0.0091 |
| S(8)  | T(9)  | 0.0968 | 0.0685 | 5.00E-04 | 0.0685 |
| S(8)  | T(10) | 0.0881 | 0.0623 | 5.00E-04 | 0.0623 |
| S(9)  | T(1)  | 0.5902 | 0.0536 | 0.5853   | 0.0536 |
| S(9)  | T(2)  | 0.1292 | 0.0914 | 0.0014   | 0.0914 |
| S(9)  | T(3)  | 0.0648 | 0.045  | 0.012    | 0.045  |
| S(9)  | T(4)  | 0.4268 | 0.3018 | 1.00E-04 | 0.3018 |
| S(9)  | T(5)  | 0.0162 | 0.0112 | 0.0034   | 0.0112 |
| S(9)  | T(6)  | 0.1741 | 0.0018 | 0.1741   | 0.0018 |
| S(9)  | T(7)  | 0.0967 | 0.0635 | 0.0358   | 0.0635 |
| S(9)  | T(8)  | 0.1575 | 0.1114 | 1.00E-04 | 0.1114 |
| S(9)  | T(9)  | 0.3189 | 0.1861 | 0.1801   | 0.1861 |
| S(9)  | T(10) | 0.0932 | 0.0654 | 0.0116   | 0.0654 |
| S(10) | T(1)  | 0.1191 | 0.0842 | 0.0015   | 0.0842 |
| S(10) | T(2)  | 0.3794 | 0.0545 | 0.3715   | 0.0545 |
| S(10) | T(3)  | 0.1588 | 0.1123 | 5.00E-04 | 0.1123 |
| S(10) | T(4)  | 0.2546 | 0.1799 | 0.006    | 0.1799 |
| S(10) | T(5)  | 0.2841 | 0.0237 | 0.2822   | 0.0237 |
| S(10) | T(6)  | 0.2104 | 0.1487 | 0.0055   | 0.1487 |

|       |       |        |        |          |        |
|-------|-------|--------|--------|----------|--------|
| S(10) | T(7)  | 0.3816 | 0.2698 | 6.00E-04 | 0.2698 |
| S(10) | T(8)  | 0.1444 | 0.0791 | 0.0912   | 0.0791 |
| S(10) | T(9)  | 0.2367 | 0.1671 | 0.0127   | 0.1671 |
| S(10) | T(10) | 0.2637 | 0.1202 | 0.2017   | 0.1202 |
| S(0)  | T(1)  | 2.8099 | 0.0039 | 2.8099   | 0.0039 |

Table S8: SOCME calculation result of  $5\text{CzCF}_3$

| Singlet | Triplet | RSS ( $\text{cm}^{-1}$ ) | 1 ( $\text{cm}^{-1}$ ) | 0 ( $\text{cm}^{-1}$ ) | -1 ( $\text{cm}^{-1}$ ) |
|---------|---------|--------------------------|------------------------|------------------------|-------------------------|
| S(0)    | T(1)    | 0.6586                   | 0.2753                 | 0.5312                 | 0.2753                  |
| S(0)    | T(2)    | 0.9088                   | 0.6011                 | 0.3216                 | 0.6011                  |
| S(0)    | T(3)    | 0.6317                   | 0.4466                 | 0.0118                 | 0.4466                  |
| S(0)    | T(4)    | 0.5341                   | 0.1372                 | 0.4976                 | 0.1372                  |
| S(0)    | T(5)    | 1.9753                   | 1.3787                 | 0.3166                 | 1.3787                  |
| S(0)    | T(6)    | 3.1732                   | 2.2355                 | 0.273                  | 2.2355                  |
| S(0)    | T(7)    | 3.3352                   | 2.3579                 | 0.0663                 | 2.3579                  |
| S(0)    | T(8)    | 1.5189                   | 1.074                  | 0.0088                 | 1.074                   |
| S(0)    | T(9)    | 1.0798                   | 0.7619                 | 0.0691                 | 0.7619                  |
| S(0)    | T(10)   | 0.2606                   | 0.1579                 | 0.1343                 | 0.1579                  |
| S(1)    | T(1)    | 0.5183                   | 0.1726                 | 0.4573                 | 0.1726                  |
| S(1)    | T(2)    | 0.2709                   | 0.1907                 | 0.0246                 | 0.1907                  |
| S(1)    | T(3)    | 0.4599                   | 0.1442                 | 0.4122                 | 0.1442                  |
| S(1)    | T(4)    | 0.1573                   | 0.0995                 | 0.0703                 | 0.0995                  |
| S(1)    | T(5)    | 0.4409                   | 0.162                  | 0.3767                 | 0.162                   |
| S(1)    | T(6)    | 0.1482                   | 0.0892                 | 0.0776                 | 0.0892                  |
| S(1)    | T(7)    | 0.1398                   | 0.0505                 | 0.1202                 | 0.0505                  |
| S(1)    | T(8)    | 0.0534                   | 0.0376                 | 0.0054                 | 0.0376                  |
| S(1)    | T(9)    | 0.1409                   | 0.0994                 | 0.0089                 | 0.0994                  |
| S(1)    | T(10)   | 0.1189                   | 0.0736                 | 0.0574                 | 0.0736                  |
| S(2)    | T(1)    | 0.2157                   | 0.0804                 | 0.1833                 | 0.0804                  |
| S(2)    | T(2)    | 0.2141                   | 0.0671                 | 0.192                  | 0.0671                  |
| S(2)    | T(3)    | 0.225                    | 0.1474                 | 0.0844                 | 0.1474                  |
| S(2)    | T(4)    | 0.2904                   | 0.1534                 | 0.193                  | 0.1534                  |
| S(2)    | T(5)    | 0.1825                   | 0.0808                 | 0.1423                 | 0.0808                  |
| S(2)    | T(6)    | 0.3602                   | 0.2034                 | 0.2168                 | 0.2034                  |
| S(2)    | T(7)    | 0.0896                   | 0.0611                 | 0.0235                 | 0.0611                  |
| S(2)    | T(8)    | 0.1227                   | 0.0833                 | 0.0342                 | 0.0833                  |
| S(2)    | T(9)    | 0.195                    | 0.0272                 | 0.1912                 | 0.0272                  |
| S(2)    | T(10)   | 0.1264                   | 0.0658                 | 0.0855                 | 0.0658                  |
| S(3)    | T(1)    | 0.5577                   | 0.3781                 | 0.1588                 | 0.3781                  |
| S(3)    | T(2)    | 0.5931                   | 0.2811                 | 0.4402                 | 0.2811                  |
| S(3)    | T(3)    | 0.1977                   | 0.1065                 | 0.1281                 | 0.1065                  |
| S(3)    | T(4)    | 0.398                    | 0.1002                 | 0.3719                 | 0.1002                  |
| S(3)    | T(5)    | 0.2456                   | 0.1481                 | 0.1282                 | 0.1481                  |

|      |       |        |        |        |        |
|------|-------|--------|--------|--------|--------|
| S(3) | T(6)  | 0.2231 | 0.1455 | 0.0862 | 0.1455 |
| S(3) | T(7)  | 0.4196 | 0.0727 | 0.4068 | 0.0727 |
| S(3) | T(8)  | 0.0821 | 0.0568 | 0.017  | 0.0568 |
| S(3) | T(9)  | 0.1083 | 0.0604 | 0.0666 | 0.0604 |
| S(3) | T(10) | 0.1847 | 0.0854 | 0.1397 | 0.0854 |
| S(4) | T(1)  | 0.3278 | 0.1809 | 0.2049 | 0.1809 |
| S(4) | T(2)  | 0.2541 | 0.1114 | 0.1994 | 0.1114 |
| S(4) | T(3)  | 0.6231 | 0.3278 | 0.4164 | 0.3278 |
| S(4) | T(4)  | 0.256  | 0.0825 | 0.2279 | 0.0825 |
| S(4) | T(5)  | 0.1267 | 0.0896 | 0.0019 | 0.0896 |
| S(4) | T(6)  | 0.2657 | 0.1762 | 0.092  | 0.1762 |
| S(4) | T(7)  | 0.2048 | 0.0693 | 0.1799 | 0.0693 |
| S(4) | T(8)  | 0.0947 | 0.0614 | 0.038  | 0.0614 |
| S(4) | T(9)  | 0.1024 | 0.0722 | 0.0086 | 0.0722 |
| S(4) | T(10) | 0.1567 | 0.0222 | 0.1535 | 0.0222 |
| S(5) | T(1)  | 0.5013 | 0.3034 | 0.2591 | 0.3034 |
| S(5) | T(2)  | 0.8073 | 0.2377 | 0.734  | 0.2377 |
| S(5) | T(3)  | 0.142  | 0.0526 | 0.121  | 0.0526 |
| S(5) | T(4)  | 0.1265 | 0.052  | 0.1029 | 0.052  |
| S(5) | T(5)  | 0.2629 | 0.1252 | 0.1944 | 0.1252 |
| S(5) | T(6)  | 0.3264 | 0.0876 | 0.3019 | 0.0876 |
| S(5) | T(7)  | 0.1591 | 0.0868 | 0.1012 | 0.0868 |
| S(5) | T(8)  | 0.2119 | 0.0712 | 0.1865 | 0.0712 |
| S(5) | T(9)  | 0.2279 | 0.0519 | 0.2157 | 0.0519 |
| S(5) | T(10) | 0.0471 | 0.0196 | 0.0381 | 0.0196 |
| S(6) | T(1)  | 0.3801 | 0.2685 | 0.0173 | 0.2685 |
| S(6) | T(2)  | 0.1465 | 0.1015 | 0.0296 | 0.1015 |
| S(6) | T(3)  | 0.4762 | 0.0853 | 0.4607 | 0.0853 |
| S(6) | T(4)  | 0.0631 | 0.0427 | 0.0186 | 0.0427 |
| S(6) | T(5)  | 0.1549 | 0.0548 | 0.1341 | 0.0548 |
| S(6) | T(6)  | 0.2691 | 0.0364 | 0.2641 | 0.0364 |
| S(6) | T(7)  | 0.1877 | 0.0577 | 0.169  | 0.0577 |
| S(6) | T(8)  | 0.243  | 0.1059 | 0.1913 | 0.1059 |
| S(6) | T(9)  | 0.3751 | 0.0533 | 0.3674 | 0.0533 |
| S(6) | T(10) | 0.3194 | 0.0771 | 0.3002 | 0.0771 |
| S(7) | T(1)  | 0.4339 | 0.2715 | 0.2022 | 0.2715 |
| S(7) | T(2)  | 0.2548 | 0.1712 | 0.0793 | 0.1712 |
| S(7) | T(3)  | 0.6176 | 0.182  | 0.5615 | 0.182  |
| S(7) | T(4)  | 0.2965 | 0.0451 | 0.2896 | 0.0451 |
| S(7) | T(5)  | 0.5183 | 0.1707 | 0.4587 | 0.1707 |
| S(7) | T(6)  | 0.5432 | 0.265  | 0.3932 | 0.265  |
| S(7) | T(7)  | 0.3545 | 0.0706 | 0.3401 | 0.0706 |
| S(7) | T(8)  | 0.4119 | 0.0217 | 0.4108 | 0.0217 |

|       |       |        |        |        |        |
|-------|-------|--------|--------|--------|--------|
| S(7)  | T(9)  | 0.1189 | 0.0638 | 0.0775 | 0.0638 |
| S(7)  | T(10) | 0.1906 | 0.0484 | 0.1779 | 0.0484 |
| S(8)  | T(1)  | 0.6414 | 0.2915 | 0.4914 | 0.2915 |
| S(8)  | T(2)  | 0.4412 | 0.2393 | 0.2831 | 0.2393 |
| S(8)  | T(3)  | 0.2903 | 0.2047 | 0.0213 | 0.2047 |
| S(8)  | T(4)  | 0.1991 | 0.0755 | 0.168  | 0.0755 |
| S(8)  | T(5)  | 0.8859 | 0.2482 | 0.8134 | 0.2482 |
| S(8)  | T(6)  | 0.2955 | 0.1161 | 0.2457 | 0.1161 |
| S(8)  | T(7)  | 0.7056 | 0.1961 | 0.6488 | 0.1961 |
| S(8)  | T(8)  | 0.1191 | 0.0462 | 0.0995 | 0.0462 |
| S(8)  | T(9)  | 0.148  | 0.1046 | 0.004  | 0.1046 |
| S(8)  | T(10) | 0.1511 | 0.0548 | 0.1297 | 0.0548 |
| S(9)  | T(1)  | 0.126  | 0.0306 | 0.1184 | 0.0306 |
| S(9)  | T(2)  | 0.1363 | 0.0956 | 0.0175 | 0.0956 |
| S(9)  | T(3)  | 0.3169 | 0.2128 | 0.0993 | 0.2128 |
| S(9)  | T(4)  | 0.166  | 0.1172 | 0.0096 | 0.1172 |
| S(9)  | T(5)  | 0.4041 | 0.0815 | 0.3874 | 0.0815 |
| S(9)  | T(6)  | 0.3929 | 0.1415 | 0.3381 | 0.1415 |
| S(9)  | T(7)  | 0.3568 | 0.2472 | 0.0712 | 0.2472 |
| S(9)  | T(8)  | 0.1274 | 0.0809 | 0.0561 | 0.0809 |
| S(9)  | T(9)  | 0.1404 | 0.053  | 0.1187 | 0.053  |
| S(9)  | T(10) | 0.2126 | 0.0772 | 0.1824 | 0.0772 |
| S(10) | T(1)  | 0.1276 | 0.0882 | 0.0265 | 0.0882 |
| S(10) | T(2)  | 0.0965 | 0.0667 | 0.0203 | 0.0667 |
| S(10) | T(3)  | 0.3073 | 0.2078 | 0.0901 | 0.2078 |
| S(10) | T(4)  | 0.1788 | 0.1003 | 0.1088 | 0.1003 |
| S(10) | T(5)  | 0.1993 | 0.0838 | 0.1603 | 0.0838 |
| S(10) | T(6)  | 0.6341 | 0.3088 | 0.4598 | 0.3088 |
| S(10) | T(7)  | 0.2312 | 0.1102 | 0.1708 | 0.1102 |
| S(10) | T(8)  | 0.2459 | 0.1725 | 0.0305 | 0.1725 |
| S(10) | T(9)  | 0.221  | 0.128  | 0.1267 | 0.128  |
| S(10) | T(10) | 0.2452 | 0.0442 | 0.2371 | 0.0442 |

Table S9: SOCME calculation result of **5CzOCF<sub>3</sub>**

| Singlet | Triplet | RSS (cm <sup>-1</sup> ) | 1 (cm <sup>-1</sup> ) | 0 (cm <sup>-1</sup> ) | -1 (cm <sup>-1</sup> ) |
|---------|---------|-------------------------|-----------------------|-----------------------|------------------------|
| S(0)    | T(1)    | 0.1049                  | 0.0725                | 0.0227                | 0.0725                 |
| S(0)    | T(2)    | 1.8505                  | 1.3006                | 0.2031                | 1.3006                 |
| S(0)    | T(3)    | 0.7734                  | 0.5299                | 0.1912                | 0.5299                 |
| S(0)    | T(4)    | 0.707                   | 0.4361                | 0.3455                | 0.4361                 |
| S(0)    | T(5)    | 0.8256                  | 0.5737                | 0.1527                | 0.5737                 |
| S(0)    | T(6)    | 0.6668                  | 0.4535                | 0.1827                | 0.4535                 |
| S(0)    | T(7)    | 0.7754                  | 0.5467                | 0.0593                | 0.5467                 |
| S(0)    | T(8)    | 0.2711                  | 0.1304                | 0.1988                | 0.1304                 |



|      |       |        |        |        |        |
|------|-------|--------|--------|--------|--------|
| S(0) | T(9)  | 3.2408 | 2.2712 | 0.4315 | 2.2712 |
| S(0) | T(10) | 0.4303 | 0.2944 | 0.1084 | 0.2944 |
| S(1) | T(1)  | 0.4234 | 0.157  | 0.3605 | 0.157  |
| S(1) | T(2)  | 0.499  | 0.0784 | 0.4865 | 0.0784 |
| S(1) | T(3)  | 0.1468 | 0.0725 | 0.1051 | 0.0725 |
| S(1) | T(4)  | 0.1041 | 0.0279 | 0.0963 | 0.0279 |
| S(1) | T(5)  | 0.1423 | 0.0789 | 0.0882 | 0.0789 |
| S(1) | T(6)  | 0.0948 | 0.0348 | 0.081  | 0.0348 |
| S(1) | T(7)  | 0.0638 | 0.0439 | 0.0143 | 0.0439 |
| S(1) | T(8)  | 0.2439 | 0.0934 | 0.2051 | 0.0934 |
| S(1) | T(9)  | 0.1335 | 0.0936 | 0.0176 | 0.0936 |
| S(1) | T(10) | 0.7449 | 0.2854 | 0.6261 | 0.2854 |
| S(2) | T(1)  | 0.8419 | 0.0348 | 0.8405 | 0.0348 |
| S(2) | T(2)  | 0.3249 | 0.1202 | 0.2769 | 0.1202 |
| S(2) | T(3)  | 0.2135 | 0.1067 | 0.151  | 0.1067 |
| S(2) | T(4)  | 0.0537 | 0.0217 | 0.0441 | 0.0217 |
| S(2) | T(5)  | 0.1207 | 0.0554 | 0.0918 | 0.0554 |
| S(2) | T(6)  | 0.1437 | 0.101  | 0.0151 | 0.101  |
| S(2) | T(7)  | 0.1214 | 0.0527 | 0.0958 | 0.0527 |
| S(2) | T(8)  | 0.0705 | 0.001  | 0.0705 | 0.001  |
| S(2) | T(9)  | 0.1223 | 0.0853 | 0.0205 | 0.0853 |
| S(2) | T(10) | 0.4453 | 0.154  | 0.3884 | 0.154  |
| S(3) | T(1)  | 0.9811 | 0.5774 | 0.5437 | 0.5774 |
| S(3) | T(2)  | 0.1966 | 0.1    | 0.1366 | 0.1    |
| S(3) | T(3)  | 0.1009 | 0.0674 | 0.0329 | 0.0674 |
| S(3) | T(4)  | 0.0767 | 0.0319 | 0.0621 | 0.0319 |
| S(3) | T(5)  | 0.0312 | 0.0121 | 0.0261 | 0.0121 |
| S(3) | T(6)  | 0.0555 | 0.0284 | 0.0383 | 0.0284 |
| S(3) | T(7)  | 0.303  | 0.0525 | 0.2938 | 0.0525 |
| S(3) | T(8)  | 0.1471 | 0.0309 | 0.1405 | 0.0309 |
| S(3) | T(9)  | 0.0351 | 0.0241 | 0.0085 | 0.0241 |
| S(3) | T(10) | 0.1366 | 0.0223 | 0.1329 | 0.0223 |
| S(4) | T(1)  | 0.4568 | 0.2957 | 0.1837 | 0.2957 |
| S(4) | T(2)  | 0.0717 | 0.0046 | 0.0714 | 0.0046 |
| S(4) | T(3)  | 0.1924 | 0.0478 | 0.1802 | 0.0478 |
| S(4) | T(4)  | 0.0677 | 0.0475 | 0.0084 | 0.0475 |
| S(4) | T(5)  | 0.3285 | 0.0627 | 0.3163 | 0.0627 |
| S(4) | T(6)  | 0.3113 | 0.0555 | 0.3012 | 0.0555 |
| S(4) | T(7)  | 0.0453 | 0.0246 | 0.0289 | 0.0246 |
| S(4) | T(8)  | 0.1418 | 0.0453 | 0.1266 | 0.0453 |
| S(4) | T(9)  | 0.1899 | 0.0965 | 0.1322 | 0.0965 |
| S(4) | T(10) | 0.0735 | 0.0486 | 0.0261 | 0.0486 |
| S(5) | T(1)  | 0.3383 | 0.2159 | 0.1456 | 0.2159 |

|      |       |        |        |          |        |
|------|-------|--------|--------|----------|--------|
| S(5) | T(2)  | 0.4286 | 0.2992 | 0.0685   | 0.2992 |
| S(5) | T(3)  | 0.204  | 0.1286 | 0.0925   | 0.1286 |
| S(5) | T(4)  | 0.1443 | 0.0319 | 0.1371   | 0.0319 |
| S(5) | T(5)  | 0.1742 | 0.0921 | 0.1157   | 0.0921 |
| S(5) | T(6)  | 0.14   | 0.0791 | 0.0843   | 0.0791 |
| S(5) | T(7)  | 0.1004 | 0.0706 | 0.0105   | 0.0706 |
| S(5) | T(8)  | 0.066  | 0.0366 | 0.041    | 0.0366 |
| S(5) | T(9)  | 0.352  | 0.0613 | 0.3412   | 0.0613 |
| S(5) | T(10) | 0.2989 | 0.0927 | 0.2686   | 0.0927 |
| S(6) | T(1)  | 0.2906 | 0.1003 | 0.2536   | 0.1003 |
| S(6) | T(2)  | 0.2696 | 0.1836 | 0.0725   | 0.1836 |
| S(6) | T(3)  | 0.3842 | 0.1273 | 0.3394   | 0.1273 |
| S(6) | T(4)  | 0.1434 | 0.0947 | 0.0514   | 0.0947 |
| S(6) | T(5)  | 0.0732 | 0.0321 | 0.0575   | 0.0321 |
| S(6) | T(6)  | 0.2195 | 0.0996 | 0.1684   | 0.0996 |
| S(6) | T(7)  | 0.1989 | 0.0581 | 0.1811   | 0.0581 |
| S(6) | T(8)  | 0.0481 | 0.0313 | 0.0188   | 0.0313 |
| S(6) | T(9)  | 0.1931 | 0.0546 | 0.177    | 0.0546 |
| S(6) | T(10) | 0.1458 | 0.0528 | 0.1252   | 0.0528 |
| S(7) | T(1)  | 0.3477 | 0.2348 | 0.103    | 0.2348 |
| S(7) | T(2)  | 0.4109 | 0.2723 | 0.1431   | 0.2723 |
| S(7) | T(3)  | 0.1711 | 0.1209 | 0.0072   | 0.1209 |
| S(7) | T(4)  | 0.3104 | 0.1585 | 0.2147   | 0.1585 |
| S(7) | T(5)  | 0.2267 | 0.0811 | 0.1955   | 0.0811 |
| S(7) | T(6)  | 0.1753 | 0.0934 | 0.1152   | 0.0934 |
| S(7) | T(7)  | 0.099  | 0.0336 | 0.0869   | 0.0336 |
| S(7) | T(8)  | 0.151  | 0.0953 | 0.068    | 0.0953 |
| S(7) | T(9)  | 0.3849 | 0.2686 | 0.0615   | 0.2686 |
| S(7) | T(10) | 0.5761 | 0.2895 | 0.4053   | 0.2895 |
| S(8) | T(1)  | 0.0855 | 0.0605 | 6.00E-04 | 0.0605 |
| S(8) | T(2)  | 0.1275 | 0.0839 | 0.0464   | 0.0839 |
| S(8) | T(3)  | 0.0538 | 0.0321 | 0.0289   | 0.0321 |
| S(8) | T(4)  | 0.1317 | 0.0875 | 0.0451   | 0.0875 |
| S(8) | T(5)  | 0.1992 | 0.0701 | 0.1728   | 0.0701 |
| S(8) | T(6)  | 0.1501 | 0.0478 | 0.134    | 0.0478 |
| S(8) | T(7)  | 0.0154 | 0.0104 | 0.0044   | 0.0104 |
| S(8) | T(8)  | 0.0479 | 0.0325 | 0.0133   | 0.0325 |
| S(8) | T(9)  | 0.2318 | 0.1362 | 0.1289   | 0.1362 |
| S(8) | T(10) | 0.532  | 0.1918 | 0.4577   | 0.1918 |
| S(9) | T(1)  | 0.1593 | 0.1104 | 0.0319   | 0.1104 |
| S(9) | T(2)  | 0.2828 | 0.1116 | 0.2347   | 0.1116 |
| S(9) | T(3)  | 0.0675 | 0.0376 | 0.0415   | 0.0376 |
| S(9) | T(4)  | 0.2991 | 0.1909 | 0.1289   | 0.1909 |

|       |       |        |        |        |        |
|-------|-------|--------|--------|--------|--------|
| S(9)  | T(5)  | 0.0698 | 0.0327 | 0.0523 | 0.0327 |
| S(9)  | T(6)  | 0.1265 | 0.0791 | 0.059  | 0.0791 |
| S(9)  | T(7)  | 0.1236 | 0.0864 | 0.0182 | 0.0864 |
| S(9)  | T(8)  | 0.1634 | 0.1122 | 0.0392 | 0.1122 |
| S(9)  | T(9)  | 0.1951 | 0.0818 | 0.1571 | 0.0818 |
| S(9)  | T(10) | 0.316  | 0.2217 | 0.0402 | 0.2217 |
| S(10) | T(1)  | 0.1812 | 0.1258 | 0.0347 | 0.1258 |
| S(10) | T(2)  | 0.5955 | 0.3991 | 0.1896 | 0.3991 |
| S(10) | T(3)  | 0.3335 | 0.2358 | 0.0046 | 0.2358 |
| S(10) | T(4)  | 0.3814 | 0.1767 | 0.2881 | 0.1767 |
| S(10) | T(5)  | 0.1641 | 0.1154 | 0.0176 | 0.1154 |
| S(10) | T(6)  | 0.0882 | 0.057  | 0.0357 | 0.057  |
| S(10) | T(7)  | 0.0494 | 0.0348 | 0.0035 | 0.0348 |
| S(10) | T(8)  | 0.0459 | 0.032  | 0.0072 | 0.032  |
| S(10) | T(9)  | 0.3625 | 0.248  | 0.0916 | 0.248  |
| S(10) | T(10) | 0.4767 | 0.2543 | 0.3129 | 0.2543 |

Table S10: SOCME calculation result of **5CzSCF<sub>3</sub>**

| Singlet | Triplet | RSS (cm <sup>-1</sup> ) | 1 (cm <sup>-1</sup> ) | 0 (cm <sup>-1</sup> ) | -1 (cm <sup>-1</sup> ) |
|---------|---------|-------------------------|-----------------------|-----------------------|------------------------|
| S(0)    | T(1)    | 10.3115                 | 6.1996                | 5.4273                | 6.1996                 |
| S(0)    | T(2)    | 4.1963                  | 2.8975                | 0.9043                | 2.8975                 |
| S(0)    | T(3)    | 2.4596                  | 1.5142                | 1.2099                | 1.5142                 |
| S(0)    | T(4)    | 7.5954                  | 4.6558                | 3.7864                | 4.6558                 |
| S(0)    | T(5)    | 2.5898                  | 1.7676                | 0.6771                | 1.7676                 |
| S(0)    | T(6)    | 1.2763                  | 0.8981                | 0.126                 | 0.8981                 |
| S(0)    | T(7)    | 1.8918                  | 0.9889                | 1.2741                | 0.9889                 |
| S(0)    | T(8)    | 1.8155                  | 0.9395                | 1.2371                | 0.9395                 |
| S(0)    | T(9)    | 1.7634                  | 0.8698                | 1.2635                | 0.8698                 |
| S(0)    | T(10)   | 0.9338                  | 0.6227                | 0.3105                | 0.6227                 |
| S(1)    | T(1)    | 1.5                     | 0.4272                | 1.373                 | 0.4272                 |
| S(1)    | T(2)    | 0.4255                  | 0.155                 | 0.3648                | 0.155                  |
| S(1)    | T(3)    | 0.6054                  | 0.2696                | 0.4703                | 0.2696                 |
| S(1)    | T(4)    | 0.7685                  | 0.3011                | 0.6397                | 0.3011                 |
| S(1)    | T(5)    | 0.073                   | 0.0486                | 0.0244                | 0.0486                 |
| S(1)    | T(6)    | 0.1632                  | 0.0468                | 0.1492                | 0.0468                 |
| S(1)    | T(7)    | 0.0996                  | 0.0644                | 0.0402                | 0.0644                 |
| S(1)    | T(8)    | 0.0803                  | 0.03                  | 0.0682                | 0.03                   |
| S(1)    | T(9)    | 0.1534                  | 0.0216                | 0.1503                | 0.0216                 |
| S(1)    | T(10)   | 0.1341                  | 0.0791                | 0.0739                | 0.0791                 |
| S(2)    | T(1)    | 0.6057                  | 0.3343                | 0.3785                | 0.3343                 |
| S(2)    | T(2)    | 0.6248                  | 0.2694                | 0.4952                | 0.2694                 |
| S(2)    | T(3)    | 0.0824                  | 0.0546                | 0.0289                | 0.0546                 |
| S(2)    | T(4)    | 0.2262                  | 0.1528                | 0.0667                | 0.1528                 |

|      |       |        |        |        |        |
|------|-------|--------|--------|--------|--------|
| S(2) | T(5)  | 0.3565 | 0.2465 | 0.0744 | 0.2465 |
| S(2) | T(6)  | 0.1704 | 0.1026 | 0.0893 | 0.1026 |
| S(2) | T(7)  | 0.0578 | 0.0244 | 0.0464 | 0.0244 |
| S(2) | T(8)  | 0.1801 | 0.1219 | 0.0522 | 0.1219 |
| S(2) | T(9)  | 0.1555 | 0.1075 | 0.0326 | 0.1075 |
| S(2) | T(10) | 0.1541 | 0.032  | 0.1474 | 0.032  |
| S(3) | T(1)  | 0.5623 | 0.3833 | 0.1492 | 0.3833 |
| S(3) | T(2)  | 0.5912 | 0.2082 | 0.5127 | 0.2082 |
| S(3) | T(3)  | 0.1541 | 0.0903 | 0.0862 | 0.0903 |
| S(3) | T(4)  | 0.1721 | 0.1116 | 0.0686 | 0.1116 |
| S(3) | T(5)  | 0.3737 | 0.1474 | 0.3101 | 0.1474 |
| S(3) | T(6)  | 0.2993 | 0.1049 | 0.2599 | 0.1049 |
| S(3) | T(7)  | 0.1084 | 0.0318 | 0.0986 | 0.0318 |
| S(3) | T(8)  | 0.1176 | 0.0816 | 0.0224 | 0.0816 |
| S(3) | T(9)  | 0.1364 | 0.0427 | 0.1223 | 0.0427 |
| S(3) | T(10) | 0.2489 | 0.0745 | 0.2255 | 0.0745 |
| S(4) | T(1)  | 0.2897 | 0.2043 | 0.022  | 0.2043 |
| S(4) | T(2)  | 0.4979 | 0.177  | 0.4304 | 0.177  |
| S(4) | T(3)  | 0.036  | 0.0243 | 0.0109 | 0.0243 |
| S(4) | T(4)  | 0.1808 | 0.0254 | 0.1772 | 0.0254 |
| S(4) | T(5)  | 0.5631 | 0.0946 | 0.547  | 0.0946 |
| S(4) | T(6)  | 0.3702 | 0.1185 | 0.3301 | 0.1185 |
| S(4) | T(7)  | 0.2345 | 0.1169 | 0.1663 | 0.1169 |
| S(4) | T(8)  | 0.2856 | 0.1435 | 0.2009 | 0.1435 |
| S(4) | T(9)  | 0.0803 | 0.0064 | 0.0798 | 0.0064 |
| S(4) | T(10) | 0.2276 | 0.1609 | 0.0043 | 0.1609 |
| S(5) | T(1)  | 0.4899 | 0.2419 | 0.3507 | 0.2419 |
| S(5) | T(2)  | 0.2862 | 0.1709 | 0.1534 | 0.1709 |
| S(5) | T(3)  | 0.7704 | 0.2856 | 0.6561 | 0.2856 |
| S(5) | T(4)  | 0.3947 | 0.2649 | 0.1242 | 0.2649 |
| S(5) | T(5)  | 0.3748 | 0.1583 | 0.3006 | 0.1583 |
| S(5) | T(6)  | 0.3776 | 0.1436 | 0.3183 | 0.1436 |
| S(5) | T(7)  | 0.157  | 0.0482 | 0.1415 | 0.0482 |
| S(5) | T(8)  | 0.1843 | 0.0643 | 0.1603 | 0.0643 |
| S(5) | T(9)  | 0.1323 | 0.05   | 0.1118 | 0.05   |
| S(5) | T(10) | 0.0642 | 0.0326 | 0.0447 | 0.0326 |
| S(6) | T(1)  | 0.1238 | 0.0876 | 0.001  | 0.0876 |
| S(6) | T(2)  | 1.1563 | 0.5253 | 0.886  | 0.5253 |
| S(6) | T(3)  | 0.1878 | 0.0481 | 0.175  | 0.0481 |
| S(6) | T(4)  | 0.0868 | 0.061  | 0.0091 | 0.061  |
| S(6) | T(5)  | 0.3987 | 0.156  | 0.332  | 0.156  |
| S(6) | T(6)  | 0.5883 | 0.16   | 0.543  | 0.16   |
| S(6) | T(7)  | 0.5362 | 0.1308 | 0.5033 | 0.1308 |

|       |       |        |        |        |        |
|-------|-------|--------|--------|--------|--------|
| S(6)  | T(8)  | 0.2426 | 0.1296 | 0.159  | 0.1296 |
| S(6)  | T(9)  | 0.2947 | 0.0926 | 0.264  | 0.0926 |
| S(6)  | T(10) | 0.067  | 0.0473 | 0.0037 | 0.0473 |
| S(7)  | T(1)  | 0.6913 | 0.1194 | 0.6704 | 0.1194 |
| S(7)  | T(2)  | 0.4386 | 0.2987 | 0.1179 | 0.2987 |
| S(7)  | T(3)  | 0.9065 | 0.3035 | 0.7984 | 0.3035 |
| S(7)  | T(4)  | 0.4739 | 0.1103 | 0.4475 | 0.1103 |
| S(7)  | T(5)  | 0.2142 | 0.0951 | 0.1668 | 0.0951 |
| S(7)  | T(6)  | 0.3585 | 0.0654 | 0.3463 | 0.0654 |
| S(7)  | T(7)  | 0.0725 | 0.0512 | 0.0039 | 0.0512 |
| S(7)  | T(8)  | 0.0645 | 0.038  | 0.0357 | 0.038  |
| S(7)  | T(9)  | 0.2316 | 0.016  | 0.2305 | 0.016  |
| S(7)  | T(10) | 0.2486 | 0.1245 | 0.1754 | 0.1245 |
| S(8)  | T(1)  | 0.4365 | 0.2288 | 0.293  | 0.2288 |
| S(8)  | T(2)  | 0.3343 | 0.2358 | 0.0234 | 0.2358 |
| S(8)  | T(3)  | 0.5754 | 0.1863 | 0.5115 | 0.1863 |
| S(8)  | T(4)  | 0.7776 | 0.3811 | 0.5605 | 0.3811 |
| S(8)  | T(5)  | 0.4965 | 0.2001 | 0.408  | 0.2001 |
| S(8)  | T(6)  | 0.4022 | 0.1739 | 0.3183 | 0.1739 |
| S(8)  | T(7)  | 0.1968 | 0.1162 | 0.1084 | 0.1162 |
| S(8)  | T(8)  | 0.1668 | 0.0945 | 0.1    | 0.0945 |
| S(8)  | T(9)  | 0.1546 | 0.0475 | 0.1392 | 0.0475 |
| S(8)  | T(10) | 0.2203 | 0.1552 | 0.0191 | 0.1552 |
| S(9)  | T(1)  | 0.4418 | 0.2555 | 0.2543 | 0.2555 |
| S(9)  | T(2)  | 0.3807 | 0.2471 | 0.1509 | 0.2471 |
| S(9)  | T(3)  | 0.1342 | 0.0825 | 0.0661 | 0.0825 |
| S(9)  | T(4)  | 0.1263 | 0.0854 | 0.0367 | 0.0854 |
| S(9)  | T(5)  | 0.3361 | 0.2371 | 0.0226 | 0.2371 |
| S(9)  | T(6)  | 0.4949 | 0.3295 | 0.1667 | 0.3295 |
| S(9)  | T(7)  | 0.1928 | 0.1355 | 0.0212 | 0.1355 |
| S(9)  | T(8)  | 0.2309 | 0.1586 | 0.0552 | 0.1586 |
| S(9)  | T(9)  | 0.2332 | 0.1011 | 0.1843 | 0.1011 |
| S(9)  | T(10) | 0.2297 | 0.154  | 0.073  | 0.154  |
| S(10) | T(1)  | 0.0954 | 0.0297 | 0.0857 | 0.0297 |
| S(10) | T(2)  | 0.0884 | 0.0569 | 0.0367 | 0.0569 |
| S(10) | T(3)  | 0.4535 | 0.2419 | 0.2978 | 0.2419 |
| S(10) | T(4)  | 0.09   | 0.0238 | 0.0834 | 0.0238 |
| S(10) | T(5)  | 0.481  | 0.307  | 0.2068 | 0.307  |
| S(10) | T(6)  | 0.3956 | 0.2191 | 0.2459 | 0.2191 |
| S(10) | T(7)  | 0.0472 | 0.0331 | 0.0054 | 0.0331 |
| S(10) | T(8)  | 0.1108 | 0.0376 | 0.0972 | 0.0376 |
| S(10) | T(9)  | 0.189  | 0.1023 | 0.1215 | 0.1023 |
| S(10) | T(10) | 0.1279 | 0.02   | 0.1247 | 0.02   |

Table S11: SOCME calculation result of 5CzSF<sub>5</sub>

| Singlet | Triplet | RSS (cm <sup>-1</sup> ) | 1 (cm <sup>-1</sup> ) | 0 (cm <sup>-1</sup> ) | -1 (cm <sup>-1</sup> ) |
|---------|---------|-------------------------|-----------------------|-----------------------|------------------------|
| S(0)    | T(1)    | 1.1319                  | 0.8004                | 0.0033                | 0.8004                 |
| S(0)    | T(2)    | 1.1431                  | 0.0982                | 1.1346                | 0.0982                 |
| S(0)    | T(3)    | 1.5885                  | 1.1232                | 0.0019                | 1.1232                 |
| S(0)    | T(4)    | 2.3072                  | 1.6251                | 0.2039                | 1.6251                 |
| S(0)    | T(5)    | 2.2654                  | 1.6018                | 0.0012                | 1.6018                 |
| S(0)    | T(6)    | 2.2332                  | 1.578                 | 0.0833                | 1.578                  |
| S(0)    | T(7)    | 4.7612                  | 3.3667                | 0.001                 | 3.3667                 |
| S(0)    | T(8)    | 4.3176                  | 2.976                 | 0.9638                | 2.976                  |
| S(0)    | T(9)    | 2.2609                  | 1.5986                | 0.0319                | 1.5986                 |
| S(0)    | T(10)   | 2.7303                  | 1.797                 | 0.998                 | 1.797                  |
| S(1)    | T(1)    | 1.4676                  | 1.0348                | 0.1104                | 1.0348                 |
| S(1)    | T(2)    | 0.0237                  | 0.0166                | 0.0032                | 0.0166                 |
| S(1)    | T(3)    | 0.41                    | 0.1315                | 0.3654                | 0.1315                 |
| S(1)    | T(4)    | 0.0245                  | 0.0173                | 2.00E-04              | 0.0173                 |
| S(1)    | T(5)    | 0.9099                  | 0.5496                | 0.473                 | 0.5496                 |
| S(1)    | T(6)    | 0.0825                  | 0.0583                | 9.00E-04              | 0.0583                 |
| S(1)    | T(7)    | 0.0863                  | 0.0225                | 0.0802                | 0.0225                 |
| S(1)    | T(8)    | 0.0042                  | 0.0029                | 0.001                 | 0.0029                 |
| S(1)    | T(9)    | 0.8493                  | 0.4554                | 0.5536                | 0.4554                 |
| S(1)    | T(10)   | 0.0394                  | 0.0252                | 0.0166                | 0.0252                 |
| S(2)    | T(1)    | 0.0736                  | 0.052                 | 0.0013                | 0.052                  |
| S(2)    | T(2)    | 1.401                   | 0.8613                | 0.6922                | 0.8613                 |
| S(2)    | T(3)    | 0.0082                  | 0.0057                | 0.0016                | 0.0057                 |
| S(2)    | T(4)    | 0.5225                  | 0.3472                | 0.1785                | 0.3472                 |
| S(2)    | T(5)    | 0.0732                  | 0.0517                | 0.003                 | 0.0517                 |
| S(2)    | T(6)    | 0.4857                  | 0.3378                | 0.0877                | 0.3378                 |
| S(2)    | T(7)    | 0.0772                  | 0.0546                | 0.0011                | 0.0546                 |
| S(2)    | T(8)    | 0.1781                  | 0.0221                | 0.1753                | 0.0221                 |
| S(2)    | T(9)    | 0.0963                  | 0.068                 | 0.0058                | 0.068                  |
| S(2)    | T(10)   | 0.5699                  | 0.393                 | 0.1261                | 0.393                  |
| S(3)    | T(1)    | 0.1172                  | 0.0828                | 0.003                 | 0.0828                 |
| S(3)    | T(2)    | 0.5097                  | 0.1399                | 0.4697                | 0.1399                 |
| S(3)    | T(3)    | 0.0552                  | 0.0389                | 0.0049                | 0.0389                 |
| S(3)    | T(4)    | 1.5231                  | 1.0192                | 0.4923                | 1.0192                 |
| S(3)    | T(5)    | 0.0356                  | 0.0249                | 0.0053                | 0.0249                 |
| S(3)    | T(6)    | 0.6701                  | 0.0228                | 0.6693                | 0.0228                 |
| S(3)    | T(7)    | 0.0051                  | 0.0022                | 0.004                 | 0.0022                 |
| S(3)    | T(8)    | 0.0498                  | 0.0119                | 0.0469                | 0.0119                 |
| S(3)    | T(9)    | 0.0766                  | 0.0538                | 0.0083                | 0.0538                 |
| S(3)    | T(10)   | 0.5781                  | 0.3755                | 0.2283                | 0.3755                 |
| S(4)    | T(1)    | 0.3905                  | 0.0824                | 0.3728                | 0.0824                 |

|      |       |        |        |          |        |
|------|-------|--------|--------|----------|--------|
| S(4) | T(2)  | 0.1048 | 0.0741 | 0.004    | 0.0741 |
| S(4) | T(3)  | 1.547  | 0.9057 | 0.8676   | 0.9057 |
| S(4) | T(4)  | 0.0293 | 0.0207 | 0.0022   | 0.0207 |
| S(4) | T(5)  | 0.8371 | 0.2292 | 0.7718   | 0.2292 |
| S(4) | T(6)  | 0.0178 | 0.0121 | 0.0046   | 0.0121 |
| S(4) | T(7)  | 0.8144 | 0.3729 | 0.6206   | 0.3729 |
| S(4) | T(8)  | 0.0362 | 0.0256 | 1.00E-04 | 0.0256 |
| S(4) | T(9)  | 0.847  | 0.5646 | 0.2826   | 0.5646 |
| S(4) | T(10) | 0.0291 | 0.0191 | 0.0109   | 0.0191 |
| S(5) | T(1)  | 0.301  | 0.1014 | 0.2647   | 0.1014 |
| S(5) | T(2)  | 0.2204 | 0.1558 | 0.0011   | 0.1558 |
| S(5) | T(3)  | 0.9322 | 0.2861 | 0.8398   | 0.2861 |
| S(5) | T(4)  | 0.025  | 0.0177 | 3.00E-04 | 0.0177 |
| S(5) | T(5)  | 1.1633 | 0.6742 | 0.6664   | 0.6742 |
| S(5) | T(6)  | 0.0576 | 0.0407 | 0.0017   | 0.0407 |
| S(5) | T(7)  | 0.7754 | 0.5472 | 0.0494   | 0.5472 |
| S(5) | T(8)  | 0.1284 | 0.0907 | 0.0046   | 0.0907 |
| S(5) | T(9)  | 1.0486 | 0.2402 | 0.9921   | 0.2402 |
| S(5) | T(10) | 0.1053 | 0.0718 | 0.0275   | 0.0718 |
| S(6) | T(1)  | 0.3138 | 0.2219 | 0.0022   | 0.2219 |
| S(6) | T(2)  | 0.4196 | 0.2245 | 0.2743   | 0.2245 |
| S(6) | T(3)  | 0.2517 | 0.1779 | 0        | 0.1779 |
| S(6) | T(4)  | 1.9159 | 1.0317 | 1.2417   | 1.0317 |
| S(6) | T(5)  | 0.1374 | 0.0971 | 0.0023   | 0.0971 |
| S(6) | T(6)  | 1.4443 | 0.9178 | 0.6334   | 0.9178 |
| S(6) | T(7)  | 0.1294 | 0.0915 | 0.001    | 0.0915 |
| S(6) | T(8)  | 0.4241 | 0.2201 | 0.288    | 0.2201 |
| S(6) | T(9)  | 0.0307 | 0.0207 | 0.009    | 0.0207 |
| S(6) | T(10) | 0.9056 | 0.6057 | 0.2941   | 0.6057 |
| S(7) | T(1)  | 0.1907 | 0.1348 | 0.001    | 0.1348 |
| S(7) | T(2)  | 0.3779 | 0.2116 | 0.2308   | 0.2116 |
| S(7) | T(3)  | 0.0164 | 0.0116 | 3.00E-04 | 0.0116 |
| S(7) | T(4)  | 0.4843 | 0.3296 | 0.1315   | 0.3296 |
| S(7) | T(5)  | 0.0356 | 0.0251 | 0.0024   | 0.0251 |
| S(7) | T(6)  | 1.064  | 0.12   | 1.0503   | 0.12   |
| S(7) | T(7)  | 0.007  | 0.0048 | 0.0021   | 0.0048 |
| S(7) | T(8)  | 1.2842 | 0.6141 | 0.946    | 0.6141 |
| S(7) | T(9)  | 0.0425 | 0.0171 | 0.0349   | 0.0171 |
| S(7) | T(10) | 1.501  | 0.6474 | 1.1895   | 0.6474 |
| S(8) | T(1)  | 0.4046 | 0.0323 | 0.402    | 0.0323 |
| S(8) | T(2)  | 0.1073 | 0.0759 | 0.002    | 0.0759 |
| S(8) | T(3)  | 0.3901 | 0.2733 | 0.0533   | 0.2733 |
| S(8) | T(4)  | 0.0051 | 0.0036 | 6.00E-04 | 0.0036 |

|       |       |        |          |          |          |
|-------|-------|--------|----------|----------|----------|
| S(8)  | T(5)  | 0.4766 | 0.296    | 0.2279   | 0.296    |
| S(8)  | T(6)  | 0.0067 | 8.00E-04 | 0.0066   | 8.00E-04 |
| S(8)  | T(7)  | 1.4747 | 0.8159   | 0.9183   | 0.8159   |
| S(8)  | T(8)  | 0.0423 | 0.0299   | 5.00E-04 | 0.0299   |
| S(8)  | T(9)  | 1.1297 | 0.118    | 1.1173   | 0.118    |
| S(8)  | T(10) | 0.0369 | 0.0105   | 0.0338   | 0.0105   |
| S(9)  | T(1)  | 0.5877 | 0.2967   | 0.4116   | 0.2967   |
| S(9)  | T(2)  | 0.0568 | 0.0401   | 0.0022   | 0.0401   |
| S(9)  | T(3)  | 0.1237 | 0.0686   | 0.0768   | 0.0686   |
| S(9)  | T(4)  | 0.1448 | 0.1024   | 0.0015   | 0.1024   |
| S(9)  | T(5)  | 1.5421 | 0.937    | 0.7889   | 0.937    |
| S(9)  | T(6)  | 0.1279 | 0.0903   | 0.0081   | 0.0903   |
| S(9)  | T(7)  | 1.1439 | 0.6227   | 0.73     | 0.6227   |
| S(9)  | T(8)  | 0.0478 | 0.0337   | 0.0046   | 0.0337   |
| S(9)  | T(9)  | 1.0798 | 0.7227   | 0.3487   | 0.7227   |
| S(9)  | T(10) | 0.0444 | 0.0312   | 0.0053   | 0.0312   |
| S(10) | T(1)  | 0.0216 | 0.0141   | 0.0082   | 0.0141   |
| S(10) | T(2)  | 0.4987 | 0.3471   | 0.0881   | 0.3471   |
| S(10) | T(3)  | 0.1265 | 0.0895   | 0.0018   | 0.0895   |
| S(10) | T(4)  | 0.4396 | 0.2521   | 0.2572   | 0.2521   |
| S(10) | T(5)  | 0.0701 | 0.0488   | 0.0123   | 0.0488   |
| S(10) | T(6)  | 0.6477 | 0.0725   | 0.6396   | 0.0725   |
| S(10) | T(7)  | 0.0933 | 0.0652   | 0.0146   | 0.0652   |
| S(10) | T(8)  | 0.8704 | 0.5029   | 0.5018   | 0.5029   |
| S(10) | T(9)  | 0.0502 | 0.0352   | 0.0058   | 0.0352   |
| S(10) | T(10) | 0.974  | 0.6863   | 0.0815   | 0.6863   |

**Table S12:** SOCME calculation result of **5CzBN**

| Singlet | Triplet | RSS (cm <sup>-1</sup> ) | 1 (cm <sup>-1</sup> ) | 0 (cm <sup>-1</sup> ) | -1 (cm <sup>-1</sup> ) |
|---------|---------|-------------------------|-----------------------|-----------------------|------------------------|
| S(0)    | T(1)    | 0.8765                  | 0.6198                | 6.00E-04              | 0.6198                 |
| S(0)    | T(2)    | 0.5043                  | 0.3559                | 0.0326                | 0.3559                 |
| S(0)    | T(3)    | 2.7211                  | 1.9241                | 0                     | 1.9241                 |
| S(0)    | T(4)    | 2.8361                  | 2.0054                | 3.00E-04              | 2.0054                 |
| S(0)    | T(5)    | 1.1293                  | 0.7985                | 1.00E-04              | 0.7985                 |
| S(0)    | T(6)    | 0.7001                  | 0.4348                | 0.3347                | 0.4348                 |
| S(0)    | T(7)    | 0.307                   | 0.0587                | 0.2956                | 0.0587                 |
| S(0)    | T(8)    | 1.4144                  | 1.0001                | 1.00E-04              | 1.0001                 |
| S(0)    | T(9)    | 1.7888                  | 1.2588                | 0.1743                | 1.2588                 |
| S(0)    | T(10)   | 0.7103                  | 0.4652                | 0.2678                | 0.4652                 |
| S(1)    | T(1)    | 0.9453                  | 0.1045                | 0.9336                | 0.1045                 |
| S(1)    | T(2)    | 0.0457                  | 0.0323                | 0.0017                | 0.0323                 |
| S(1)    | T(3)    | 0.2524                  | 0.1651                | 0.0959                | 0.1651                 |
| S(1)    | T(4)    | 0.1927                  | 0.1356                | 0.0187                | 0.1356                 |



|      |       |        |          |          |          |
|------|-------|--------|----------|----------|----------|
| S(1) | T(5)  | 0.1782 | 0.0015   | 0.1782   | 0.0015   |
| S(1) | T(6)  | 0.2798 | 0.1978   | 0        | 0.1978   |
| S(1) | T(7)  | 0.1934 | 0.1368   | 1.00E-04 | 0.1368   |
| S(1) | T(8)  | 0.1343 | 0.0919   | 0.0338   | 0.0919   |
| S(1) | T(9)  | 0.0696 | 0.0492   | 1.00E-04 | 0.0492   |
| S(1) | T(10) | 0.1917 | 0.1356   | 0        | 0.1356   |
| S(2) | T(1)  | 0.1964 | 0.1389   | 9.00E-04 | 0.1389   |
| S(2) | T(2)  | 0.5505 | 0.3165   | 0.3206   | 0.3165   |
| S(2) | T(3)  | 0.0086 | 0.0061   | 0        | 0.0061   |
| S(2) | T(4)  | 0.1441 | 0.1019   | 0        | 0.1019   |
| S(2) | T(5)  | 0.0899 | 0.0636   | 1.00E-04 | 0.0636   |
| S(2) | T(6)  | 0.1303 | 0.0732   | 0.0791   | 0.0732   |
| S(2) | T(7)  | 0.1893 | 0.0504   | 0.1754   | 0.0504   |
| S(2) | T(8)  | 0.1544 | 0.1092   | 0        | 0.1092   |
| S(2) | T(9)  | 0.242  | 0.1431   | 0.1328   | 0.1431   |
| S(2) | T(10) | 0.1791 | 0.1263   | 0.0122   | 0.1263   |
| S(3) | T(1)  | 0.1943 | 0.1374   | 0.0012   | 0.1374   |
| S(3) | T(2)  | 0.7046 | 0.1263   | 0.6816   | 0.1263   |
| S(3) | T(3)  | 0.0025 | 0.0018   | 1.00E-04 | 0.0018   |
| S(3) | T(4)  | 0.1294 | 0.0915   | 1.00E-04 | 0.0915   |
| S(3) | T(5)  | 0.0221 | 0.0157   | 1.00E-04 | 0.0157   |
| S(3) | T(6)  | 0.5807 | 0.4076   | 0.0697   | 0.4076   |
| S(3) | T(7)  | 0.3209 | 0.1741   | 0.2058   | 0.1741   |
| S(3) | T(8)  | 0.6302 | 0.4456   | 1.00E-04 | 0.4456   |
| S(3) | T(9)  | 0.3342 | 0.0049   | 0.3341   | 0.0049   |
| S(3) | T(10) | 0.263  | 0.1051   | 0.217    | 0.1051   |
| S(4) | T(1)  | 0.3338 | 0.236    | 2.00E-04 | 0.236    |
| S(4) | T(2)  | 0.5337 | 0.3422   | 0.225    | 0.3422   |
| S(4) | T(3)  | 0.1135 | 0.0802   | 0        | 0.0802   |
| S(4) | T(4)  | 0.0614 | 0.0435   | 1.00E-04 | 0.0435   |
| S(4) | T(5)  | 0.0012 | 8.00E-04 | 0        | 8.00E-04 |
| S(4) | T(6)  | 1.0172 | 0.0158   | 1.017    | 0.0158   |
| S(4) | T(7)  | 0.285  | 0.1328   | 0.2143   | 0.1328   |
| S(4) | T(8)  | 0.176  | 0.1244   | 2.00E-04 | 0.1244   |
| S(4) | T(9)  | 0.2177 | 0.079    | 0.1869   | 0.079    |
| S(4) | T(10) | 0.1606 | 0.0655   | 0.1313   | 0.0655   |
| S(5) | T(1)  | 0.8336 | 0.5447   | 0.3187   | 0.5447   |
| S(5) | T(2)  | 0.3817 | 0.2699   | 4.00E-04 | 0.2699   |
| S(5) | T(3)  | 0.4304 | 0.2934   | 0.1144   | 0.2934   |
| S(5) | T(4)  | 1.0702 | 0.1134   | 1.0581   | 0.1134   |
| S(5) | T(5)  | 0.2699 | 0.0615   | 0.2556   | 0.0615   |
| S(5) | T(6)  | 0.1294 | 0.0915   | 1.00E-04 | 0.0915   |
| S(5) | T(7)  | 0.2963 | 0.2095   | 0        | 0.2095   |

|      |       |        |          |          |          |
|------|-------|--------|----------|----------|----------|
| S(5) | T(8)  | 0.2612 | 0.0608   | 0.2467   | 0.0608   |
| S(5) | T(9)  | 0.0639 | 0.0452   | 0        | 0.0452   |
| S(5) | T(10) | 0.1173 | 0.083    | 0        | 0.083    |
| S(6) | T(1)  | 0.4563 | 0.2327   | 0.3161   | 0.2327   |
| S(6) | T(2)  | 0.2306 | 0.1631   | 5.00E-04 | 0.1631   |
| S(6) | T(3)  | 0.247  | 0.0573   | 0.2334   | 0.0573   |
| S(6) | T(4)  | 0.5994 | 0.3309   | 0.3746   | 0.3309   |
| S(6) | T(5)  | 0.1677 | 0.0112   | 0.167    | 0.0112   |
| S(6) | T(6)  | 0.3615 | 0.2556   | 1.00E-04 | 0.2556   |
| S(6) | T(7)  | 0.0108 | 0.0077   | 0        | 0.0077   |
| S(6) | T(8)  | 0.1576 | 0.1083   | 0.0372   | 0.1083   |
| S(6) | T(9)  | 0.008  | 0.0057   | 0        | 0.0057   |
| S(6) | T(10) | 0.1149 | 0.0813   | 1.00E-04 | 0.0813   |
| S(7) | T(1)  | 0.3889 | 0.275    | 4.00E-04 | 0.275    |
| S(7) | T(2)  | 0.3151 | 0.1159   | 0.2691   | 0.1159   |
| S(7) | T(3)  | 0.3894 | 0.2754   | 2.00E-04 | 0.2754   |
| S(7) | T(4)  | 0.2074 | 0.1467   | 3.00E-04 | 0.1467   |
| S(7) | T(5)  | 0.2309 | 0.1633   | 1.00E-04 | 0.1633   |
| S(7) | T(6)  | 0.4728 | 0.0083   | 0.4726   | 0.0083   |
| S(7) | T(7)  | 0.1499 | 0.1057   | 0.0106   | 0.1057   |
| S(7) | T(8)  | 0.0581 | 0.0411   | 1.00E-04 | 0.0411   |
| S(7) | T(9)  | 0.3757 | 0.0721   | 0.3616   | 0.0721   |
| S(7) | T(10) | 0.1531 | 0.0634   | 0.1241   | 0.0634   |
| S(8) | T(1)  | 0.212  | 0.1499   | 5.00E-04 | 0.1499   |
| S(8) | T(2)  | 0.0838 | 0.059    | 0.0083   | 0.059    |
| S(8) | T(3)  | 0.5079 | 0.3591   | 2.00E-04 | 0.3591   |
| S(8) | T(4)  | 0.2162 | 0.1529   | 3.00E-04 | 0.1529   |
| S(8) | T(5)  | 0.1407 | 0.0995   | 8.00E-04 | 0.0995   |
| S(8) | T(6)  | 0.5601 | 0.0503   | 0.5556   | 0.0503   |
| S(8) | T(7)  | 0.3271 | 0.1776   | 0.2096   | 0.1776   |
| S(8) | T(8)  | 0.0265 | 0.0187   | 2.00E-04 | 0.0187   |
| S(8) | T(9)  | 0.3774 | 4.00E-04 | 0.3774   | 4.00E-04 |
| S(8) | T(10) | 0.0976 | 0.007    | 0.0971   | 0.007    |
| S(9) | T(1)  | 0.3026 | 0.0118   | 0.3021   | 0.0118   |
| S(9) | T(2)  | 0.0246 | 0.0174   | 6.00E-04 | 0.0174   |
| S(9) | T(3)  | 0.0845 | 5.00E-04 | 0.0845   | 5.00E-04 |
| S(9) | T(4)  | 0.2455 | 0.0835   | 0.2153   | 0.0835   |
| S(9) | T(5)  | 0.7086 | 0.2875   | 0.5804   | 0.2875   |
| S(9) | T(6)  | 0.0325 | 0.023    | 7.00E-04 | 0.023    |
| S(9) | T(7)  | 0.0735 | 0.052    | 3.00E-04 | 0.052    |
| S(9) | T(8)  | 0.1644 | 0.0036   | 0.1643   | 0.0036   |
| S(9) | T(9)  | 0.0954 | 0.0674   | 7.00E-04 | 0.0674   |
| S(9) | T(10) | 0.0581 | 0.0411   | 0        | 0.0411   |

|       |       |        |        |          |        |
|-------|-------|--------|--------|----------|--------|
| S(10) | T(1)  | 0.2531 | 0.1455 | 0.1474   | 0.1455 |
| S(10) | T(2)  | 0.1713 | 0.1211 | 1.00E-04 | 0.1211 |
| S(10) | T(3)  | 0.6072 | 0.4    | 0.2208   | 0.4    |
| S(10) | T(4)  | 0.244  | 0.0756 | 0.2194   | 0.0756 |
| S(10) | T(5)  | 0.4013 | 0.2596 | 0.1622   | 0.2596 |
| S(10) | T(6)  | 0.0919 | 0.065  | 1.00E-04 | 0.065  |
| S(10) | T(7)  | 0.2622 | 0.1854 | 0        | 0.1854 |
| S(10) | T(8)  | 0.1947 | 0.1064 | 0.1237   | 0.1064 |
| S(10) | T(9)  | 0.098  | 0.0693 | 1.00E-04 | 0.0693 |
| S(10) | T(10) | 0.0496 | 0.035  | 1.00E-04 | 0.035  |

Table S13: SOCME calculation result of **5CzBP**

| Singlet | Triplet | RSS (cm <sup>-1</sup> ) | 1 (cm <sup>-1</sup> ) | 0 (cm <sup>-1</sup> ) | -1 (cm <sup>-1</sup> ) |
|---------|---------|-------------------------|-----------------------|-----------------------|------------------------|
| S(0)    | T(1)    | 5.1406                  | 2.0566                | 4.2386                | 2.0566                 |
| S(0)    | T(2)    | 12.6777                 | 5.2506                | 10.2755               | 5.2506                 |
| S(0)    | T(3)    | 21.9967                 | 8.3015                | 18.6017               | 8.3015                 |
| S(0)    | T(4)    | 26.037                  | 10.5383               | 21.3498               | 10.5383                |
| S(0)    | T(5)    | 3.6438                  | 1.5432                | 2.918                 | 1.5432                 |
| S(0)    | T(6)    | 7.4079                  | 3.7269                | 5.2055                | 3.7269                 |
| S(0)    | T(7)    | 13.348                  | 5.3487                | 10.9978               | 5.3487                 |
| S(0)    | T(8)    | 15.2224                 | 6.5038                | 12.1293               | 6.5038                 |
| S(0)    | T(9)    | 5.6492                  | 2.9617                | 3.7908                | 2.9617                 |
| S(0)    | T(10)   | 2.5351                  | 1.7871                | 0.1976                | 1.7871                 |
| S(1)    | T(1)    | 0.8957                  | 0.1031                | 0.8837                | 0.1031                 |
| S(1)    | T(2)    | 1.508                   | 0.1807                | 1.4862                | 0.1807                 |
| S(1)    | T(3)    | 1.341                   | 0.1669                | 1.3201                | 0.1669                 |
| S(1)    | T(4)    | 1.5015                  | 0.11                  | 1.4934                | 0.11                   |
| S(1)    | T(5)    | 0.7988                  | 0.4993                | 0.3734                | 0.4993                 |
| S(1)    | T(6)    | 0.1507                  | 0.0896                | 0.0815                | 0.0896                 |
| S(1)    | T(7)    | 0.6918                  | 0.2653                | 0.5813                | 0.2653                 |
| S(1)    | T(8)    | 0.6687                  | 0.3078                | 0.5076                | 0.3078                 |
| S(1)    | T(9)    | 0.4138                  | 0.2878                | 0.0746                | 0.2878                 |
| S(1)    | T(10)   | 0.4999                  | 0.3344                | 0.1621                | 0.3344                 |
| S(2)    | T(1)    | 0.6046                  | 0.1711                | 0.554                 | 0.1711                 |
| S(2)    | T(2)    | 0.6592                  | 0.1373                | 0.6299                | 0.1373                 |
| S(2)    | T(3)    | 0.7064                  | 0.327                 | 0.534                 | 0.327                  |
| S(2)    | T(4)    | 1.1181                  | 0.2949                | 1.0374                | 0.2949                 |
| S(2)    | T(5)    | 0.7487                  | 0.4838                | 0.3043                | 0.4838                 |
| S(2)    | T(6)    | 0.3061                  | 0.2108                | 0.0694                | 0.2108                 |
| S(2)    | T(7)    | 0.6466                  | 0.4501                | 0.1141                | 0.4501                 |
| S(2)    | T(8)    | 0.7445                  | 0.3245                | 0.5863                | 0.3245                 |
| S(2)    | T(9)    | 0.5131                  | 0.3589                | 0.0749                | 0.3589                 |
| S(2)    | T(10)   | 0.6392                  | 0.4435                | 0.1231                | 0.4435                 |

|      |       |        |        |        |        |
|------|-------|--------|--------|--------|--------|
| S(3) | T(1)  | 0.5529 | 0.233  | 0.444  | 0.233  |
| S(3) | T(2)  | 0.7879 | 0.2818 | 0.6797 | 0.2818 |
| S(3) | T(3)  | 0.2386 | 0.0635 | 0.2211 | 0.0635 |
| S(3) | T(4)  | 0.5186 | 0.281  | 0.3333 | 0.281  |
| S(3) | T(5)  | 0.1516 | 0.0825 | 0.0967 | 0.0825 |
| S(3) | T(6)  | 0.2338 | 0.1573 | 0.0719 | 0.1573 |
| S(3) | T(7)  | 0.69   | 0.4341 | 0.315  | 0.4341 |
| S(3) | T(8)  | 0.2181 | 0.0966 | 0.17   | 0.0966 |
| S(3) | T(9)  | 0.4558 | 0.3171 | 0.0814 | 0.3171 |
| S(3) | T(10) | 0.3047 | 0.2154 | 0.0038 | 0.2154 |
| S(4) | T(1)  | 1.9393 | 0.5516 | 1.7755 | 0.5516 |
| S(4) | T(2)  | 0.8848 | 0.5591 | 0.3973 | 0.5591 |
| S(4) | T(3)  | 0.9457 | 0.6456 | 0.2467 | 0.6456 |
| S(4) | T(4)  | 0.7273 | 0.476  | 0.2753 | 0.476  |
| S(4) | T(5)  | 0.6336 | 0.274  | 0.5013 | 0.274  |
| S(4) | T(6)  | 0.8936 | 0.5629 | 0.4061 | 0.5629 |
| S(4) | T(7)  | 2.711  | 1.14   | 2.1796 | 1.14   |
| S(4) | T(8)  | 1.0235 | 0.7136 | 0.1701 | 0.7136 |
| S(4) | T(9)  | 0.9179 | 0.5808 | 0.4097 | 0.5808 |
| S(4) | T(10) | 0.4943 | 0.2784 | 0.2989 | 0.2784 |
| S(5) | T(1)  | 1.5232 | 0.6164 | 1.2491 | 0.6164 |
| S(5) | T(2)  | 0.8074 | 0.1675 | 0.7719 | 0.1675 |
| S(5) | T(3)  | 0.6191 | 0.2359 | 0.5215 | 0.2359 |
| S(5) | T(4)  | 0.6822 | 0.0832 | 0.672  | 0.0832 |
| S(5) | T(5)  | 0.3409 | 0.1315 | 0.2856 | 0.1315 |
| S(5) | T(6)  | 0.6322 | 0.3045 | 0.4628 | 0.3045 |
| S(5) | T(7)  | 2.0566 | 0.8438 | 1.6749 | 0.8438 |
| S(5) | T(8)  | 0.325  | 0.1949 | 0.1721 | 0.1949 |
| S(5) | T(9)  | 0.3568 | 0.2511 | 0.0347 | 0.2511 |
| S(5) | T(10) | 0.6152 | 0.3714 | 0.3203 | 0.3714 |
| S(6) | T(1)  | 0.1995 | 0.135  | 0.0582 | 0.135  |
| S(6) | T(2)  | 0.5516 | 0.1384 | 0.5158 | 0.1384 |
| S(6) | T(3)  | 0.838  | 0.2218 | 0.7771 | 0.2218 |
| S(6) | T(4)  | 1.2587 | 0.1025 | 1.2504 | 0.1025 |
| S(6) | T(5)  | 0.0996 | 0.066  | 0.0349 | 0.066  |
| S(6) | T(6)  | 0.2069 | 0.1327 | 0.0872 | 0.1327 |
| S(6) | T(7)  | 0.4117 | 0.1672 | 0.337  | 0.1672 |
| S(6) | T(8)  | 0.3467 | 0.2303 | 0.1189 | 0.2303 |
| S(6) | T(9)  | 0.0665 | 0.0335 | 0.0467 | 0.0335 |
| S(6) | T(10) | 0.183  | 0.0454 | 0.1714 | 0.0454 |
| S(7) | T(1)  | 0.9411 | 0.0973 | 0.9309 | 0.0973 |
| S(7) | T(2)  | 0.2001 | 0.1365 | 0.0527 | 0.1365 |
| S(7) | T(3)  | 0.749  | 0.2237 | 0.6789 | 0.2237 |

|       |       |        |        |        |        |
|-------|-------|--------|--------|--------|--------|
| S(7)  | T(4)  | 1.1314 | 0.3946 | 0.9842 | 0.3946 |
| S(7)  | T(5)  | 0.3268 | 0.1395 | 0.2605 | 0.1395 |
| S(7)  | T(6)  | 0.4833 | 0.3415 | 0.0175 | 0.3415 |
| S(7)  | T(7)  | 1.5867 | 0.7309 | 1.2038 | 0.7309 |
| S(7)  | T(8)  | 0.4129 | 0.2904 | 0.0419 | 0.2904 |
| S(7)  | T(9)  | 0.5646 | 0.3305 | 0.3168 | 0.3305 |
| S(7)  | T(10) | 0.5353 | 0.2753 | 0.3674 | 0.2753 |
| S(8)  | T(1)  | 1.1206 | 0.7171 | 0.4768 | 0.7171 |
| S(8)  | T(2)  | 0.3828 | 0.238  | 0.1822 | 0.238  |
| S(8)  | T(3)  | 0.1715 | 0.0842 | 0.1234 | 0.0842 |
| S(8)  | T(4)  | 0.2486 | 0.1497 | 0.1304 | 0.1497 |
| S(8)  | T(5)  | 0.3591 | 0.1387 | 0.3008 | 0.1387 |
| S(8)  | T(6)  | 0.1456 | 0.1029 | 0.0041 | 0.1029 |
| S(8)  | T(7)  | 0.5105 | 0.1995 | 0.4254 | 0.1995 |
| S(8)  | T(8)  | 0.1426 | 0.0968 | 0.0401 | 0.0968 |
| S(8)  | T(9)  | 0.3489 | 0.0793 | 0.3304 | 0.0793 |
| S(8)  | T(10) | 0.2872 | 0.0835 | 0.2618 | 0.0835 |
| S(9)  | T(1)  | 1.3424 | 0.254  | 1.2934 | 0.254  |
| S(9)  | T(2)  | 0.8802 | 0.3878 | 0.6885 | 0.3878 |
| S(9)  | T(3)  | 0.3465 | 0.0885 | 0.3231 | 0.0885 |
| S(9)  | T(4)  | 0.3691 | 0.1119 | 0.3335 | 0.1119 |
| S(9)  | T(5)  | 0.946  | 0.3825 | 0.7761 | 0.3825 |
| S(9)  | T(6)  | 0.5901 | 0.4167 | 0.0312 | 0.4167 |
| S(9)  | T(7)  | 1.9601 | 0.8176 | 1.5828 | 0.8176 |
| S(9)  | T(8)  | 0.3162 | 0.1985 | 0.1455 | 0.1985 |
| S(9)  | T(9)  | 0.7257 | 0.4362 | 0.3822 | 0.4362 |
| S(9)  | T(10) | 0.8673 | 0.3588 | 0.7034 | 0.3588 |
| S(10) | T(1)  | 0.7888 | 0.1966 | 0.7382 | 0.1966 |
| S(10) | T(2)  | 0.6839 | 0.3073 | 0.528  | 0.3073 |
| S(10) | T(3)  | 0.158  | 0.0536 | 0.1387 | 0.0536 |
| S(10) | T(4)  | 0.0118 | 0.0037 | 0.0106 | 0.0037 |
| S(10) | T(5)  | 0.6225 | 0.2383 | 0.5233 | 0.2383 |
| S(10) | T(6)  | 0.2891 | 0.1984 | 0.0695 | 0.1984 |
| S(10) | T(7)  | 1.5398 | 0.6671 | 1.217  | 0.6671 |
| S(10) | T(8)  | 0.1059 | 0.0711 | 0.0332 | 0.0711 |
| S(10) | T(9)  | 0.4752 | 0.2449 | 0.3253 | 0.2449 |
| S(10) | T(10) | 0.5909 | 0.3111 | 0.3945 | 0.3111 |

Table S14: SOCME calculation result of **5CzTRZ**

| Singlet | Triplet | RSS (cm <sup>-1</sup> ) | 1 (cm <sup>-1</sup> ) | 0 (cm <sup>-1</sup> ) | -1 (cm <sup>-1</sup> ) |
|---------|---------|-------------------------|-----------------------|-----------------------|------------------------|
| S(0)    | T(1)    | 1.3384                  | 0.9464                | 0                     | 0.9464                 |
| S(0)    | T(2)    | 0.8115                  | 0.103                 | 0.7983                | 0.103                  |
| S(0)    | T(3)    | 0.9281                  | 0.6563                | 0                     | 0.6563                 |

|      |       |        |        |          |        |
|------|-------|--------|--------|----------|--------|
| S(0) | T(4)  | 0.6522 | 0.4612 | 8.00E-04 | 0.4612 |
| S(0) | T(5)  | 0.8109 | 0.5238 | 0.3301   | 0.5238 |
| S(0) | T(6)  | 1.6148 | 1.1418 | 3.00E-04 | 1.1418 |
| S(0) | T(7)  | 1.9156 | 1.3545 | 2.00E-04 | 1.3545 |
| S(0) | T(8)  | 0.076  | 0.0418 | 0.0477   | 0.0418 |
| S(0) | T(9)  | 0.6648 | 0.3405 | 0.4584   | 0.3405 |
| S(0) | T(10) | 0.3923 | 0.2774 | 1.00E-04 | 0.2774 |
| S(1) | T(1)  | 0.0565 | 0.0399 | 1.00E-04 | 0.0399 |
| S(1) | T(2)  | 0.5656 | 0.1152 | 0.5416   | 0.1152 |
| S(1) | T(3)  | 0.0617 | 0.0437 | 0        | 0.0437 |
| S(1) | T(4)  | 0.0668 | 0.0472 | 0.0012   | 0.0472 |
| S(1) | T(5)  | 0.7703 | 0.2754 | 0.6646   | 0.2754 |
| S(1) | T(6)  | 0.0784 | 0.0555 | 4.00E-04 | 0.0555 |
| S(1) | T(7)  | 0.143  | 0.1011 | 0        | 0.1011 |
| S(1) | T(8)  | 0.7071 | 0.0863 | 0.6965   | 0.0863 |
| S(1) | T(9)  | 0.1249 | 0.0829 | 0.043    | 0.0829 |
| S(1) | T(10) | 0.1028 | 0.0727 | 1.00E-04 | 0.0727 |
| S(2) | T(1)  | 1.0127 | 0.0609 | 1.009    | 0.0609 |
| S(2) | T(2)  | 0.002  | 0.0014 | 0        | 0.0014 |
| S(2) | T(3)  | 0.155  | 0.0984 | 0.0683   | 0.0984 |
| S(2) | T(4)  | 0.3952 | 0.1212 | 0.3561   | 0.1212 |
| S(2) | T(5)  | 0.394  | 0.2786 | 7.00E-04 | 0.2786 |
| S(2) | T(6)  | 0.3606 | 0.1473 | 0.2944   | 0.1473 |
| S(2) | T(7)  | 0.5512 | 0.3125 | 0.3295   | 0.3125 |
| S(2) | T(8)  | 0.0525 | 0.0371 | 2.00E-04 | 0.0371 |
| S(2) | T(9)  | 0.188  | 0.1329 | 2.00E-04 | 0.1329 |
| S(2) | T(10) | 0.5282 | 0.0024 | 0.5282   | 0.0024 |
| S(3) | T(1)  | 0.3494 | 0.247  | 1.00E-04 | 0.247  |
| S(3) | T(2)  | 0.6191 | 0.2234 | 0.5324   | 0.2234 |
| S(3) | T(3)  | 0.064  | 0.0452 | 0        | 0.0452 |
| S(3) | T(4)  | 0.041  | 0.029  | 1.00E-04 | 0.029  |
| S(3) | T(5)  | 0.219  | 0.1547 | 0.01     | 0.1547 |
| S(3) | T(6)  | 0.0981 | 0.0693 | 0        | 0.0693 |
| S(3) | T(7)  | 0.0056 | 0.004  | 1.00E-04 | 0.004  |
| S(3) | T(8)  | 0.1059 | 0.0348 | 0.0937   | 0.0348 |
| S(3) | T(9)  | 0.0804 | 0.0568 | 3.00E-04 | 0.0568 |
| S(3) | T(10) | 0.0139 | 0.0098 | 1.00E-04 | 0.0098 |
| S(4) | T(1)  | 0.484  | 0.3422 | 0.0074   | 0.3422 |
| S(4) | T(2)  | 0.463  | 0.3274 | 1.00E-04 | 0.3274 |
| S(4) | T(3)  | 0.0703 | 0.0362 | 0.0482   | 0.0362 |
| S(4) | T(4)  | 0.0687 | 0.0476 | 0.0136   | 0.0476 |
| S(4) | T(5)  | 0.0239 | 0.0169 | 2.00E-04 | 0.0169 |
| S(4) | T(6)  | 0.5762 | 0.0358 | 0.574    | 0.0358 |

|      |       |        |        |          |        |
|------|-------|--------|--------|----------|--------|
| S(4) | T(7)  | 0.715  | 0.0344 | 0.7133   | 0.0344 |
| S(4) | T(8)  | 0.0195 | 0.0138 | 0        | 0.0138 |
| S(4) | T(9)  | 0.0386 | 0.0273 | 0        | 0.0273 |
| S(4) | T(10) | 0.292  | 0.0678 | 0.2758   | 0.0678 |
| S(5) | T(1)  | 0.8995 | 0.3893 | 0.7113   | 0.3893 |
| S(5) | T(2)  | 0.3818 | 0.27   | 1.00E-04 | 0.27   |
| S(5) | T(3)  | 0.6802 | 0.0274 | 0.6791   | 0.0274 |
| S(5) | T(4)  | 0.6715 | 0.034  | 0.6698   | 0.034  |
| S(5) | T(5)  | 0.0315 | 0.0222 | 0.001    | 0.0222 |
| S(5) | T(6)  | 0.2948 | 0.0856 | 0.2688   | 0.0856 |
| S(5) | T(7)  | 0.646  | 0.0295 | 0.6447   | 0.0295 |
| S(5) | T(8)  | 0.0275 | 0.0194 | 3.00E-04 | 0.0194 |
| S(5) | T(9)  | 0.1857 | 0.1313 | 1.00E-04 | 0.1313 |
| S(5) | T(10) | 0.1865 | 0.0315 | 0.1811   | 0.0315 |
| S(6) | T(1)  | 0.0371 | 0.0262 | 1.00E-04 | 0.0262 |
| S(6) | T(2)  | 0.797  | 0.0252 | 0.7962   | 0.0252 |
| S(6) | T(3)  | 0.01   | 0.0071 | 2.00E-04 | 0.0071 |
| S(6) | T(4)  | 0.2457 | 0.1737 | 6.00E-04 | 0.1737 |
| S(6) | T(5)  | 0.2599 | 0.0961 | 0.2215   | 0.0961 |
| S(6) | T(6)  | 0.2461 | 0.174  | 1.00E-04 | 0.174  |
| S(6) | T(7)  | 0.1351 | 0.0955 | 1.00E-04 | 0.0955 |
| S(6) | T(8)  | 0.589  | 0.0156 | 0.5886   | 0.0156 |
| S(6) | T(9)  | 0.164  | 0.0565 | 0.1432   | 0.0565 |
| S(6) | T(10) | 0.1477 | 0.1044 | 0        | 0.1044 |
| S(7) | T(1)  | 0.128  | 0.0905 | 0        | 0.0905 |
| S(7) | T(2)  | 0.4427 | 0.3121 | 0.0351   | 0.3121 |
| S(7) | T(3)  | 0.1638 | 0.1158 | 1.00E-04 | 0.1158 |
| S(7) | T(4)  | 0.0133 | 0.0093 | 0.0018   | 0.0093 |
| S(7) | T(5)  | 1.0997 | 0.0369 | 1.0985   | 0.0369 |
| S(7) | T(6)  | 0.021  | 0.0149 | 4.00E-04 | 0.0149 |
| S(7) | T(7)  | 0.1093 | 0.0773 | 1.00E-04 | 0.0773 |
| S(7) | T(8)  | 0.0817 | 0.0253 | 0.0735   | 0.0253 |
| S(7) | T(9)  | 0.0951 | 0.0478 | 0.0668   | 0.0478 |
| S(7) | T(10) | 0.023  | 0.0163 | 1.00E-04 | 0.0163 |
| S(8) | T(1)  | 0.1857 | 0.1114 | 0.0984   | 0.1114 |
| S(8) | T(2)  | 0.2184 | 0.1544 | 0        | 0.1544 |
| S(8) | T(3)  | 0.2455 | 0.1176 | 0.1806   | 0.1176 |
| S(8) | T(4)  | 0.1444 | 0.0843 | 0.0815   | 0.0843 |
| S(8) | T(5)  | 0.2614 | 0.1848 | 1.00E-04 | 0.1848 |
| S(8) | T(6)  | 0.1085 | 0.0585 | 0.0701   | 0.0585 |
| S(8) | T(7)  | 0.2465 | 0.1739 | 0.0156   | 0.1739 |
| S(8) | T(8)  | 0.0584 | 0.0413 | 0        | 0.0413 |
| S(8) | T(9)  | 0.1652 | 0.1168 | 1.00E-04 | 0.1168 |

|       |       |        |        |          |        |
|-------|-------|--------|--------|----------|--------|
| S(8)  | T(10) | 0.195  | 0.048  | 0.1828   | 0.048  |
| S(9)  | T(1)  | 0.3583 | 0.2533 | 4.00E-04 | 0.2533 |
| S(9)  | T(2)  | 0.0746 | 0.0238 | 0.0666   | 0.0238 |
| S(9)  | T(3)  | 0.5371 | 0.3798 | 4.00E-04 | 0.3798 |
| S(9)  | T(4)  | 0.0708 | 0.0501 | 5.00E-04 | 0.0501 |
| S(9)  | T(5)  | 0.563  | 0.0931 | 0.5474   | 0.0931 |
| S(9)  | T(6)  | 0.0158 | 0.0111 | 1.00E-04 | 0.0111 |
| S(9)  | T(7)  | 0.126  | 0.0891 | 1.00E-04 | 0.0891 |
| S(9)  | T(8)  | 0.159  | 0.0645 | 0.1302   | 0.0645 |
| S(9)  | T(9)  | 0.1799 | 0.125  | 0.034    | 0.125  |
| S(9)  | T(10) | 0.0441 | 0.0312 | 2.00E-04 | 0.0312 |
| S(10) | T(1)  | 0.5093 | 0.1348 | 0.4723   | 0.1348 |
| S(10) | T(2)  | 0.0078 | 0.0055 | 1.00E-04 | 0.0055 |
| S(10) | T(3)  | 0.4588 | 0.0578 | 0.4515   | 0.0578 |
| S(10) | T(4)  | 0.6868 | 0.2911 | 0.5497   | 0.2911 |
| S(10) | T(5)  | 0.0794 | 0.0561 | 6.00E-04 | 0.0561 |
| S(10) | T(6)  | 0.2607 | 0.1586 | 0.1327   | 0.1586 |
| S(10) | T(7)  | 0.1999 | 0.0185 | 0.1982   | 0.0185 |
| S(10) | T(8)  | 0.0731 | 0.0517 | 1.00E-04 | 0.0517 |
| S(10) | T(9)  | 0.0233 | 0.0165 | 1.00E-04 | 0.0165 |
| S(10) | T(10) | 0.2341 | 0.0092 | 0.2338   | 0.0092 |

## References

- (1) Frisch, M. J.; Trucks, G. W.; Schlegel, H. B.; Scuseria, G. E.; Robb, M. A.; Cheeseman, J. R.; Scalmani, G.; Barone, V.; Mennucci, B.; Petersson, G. A.; Nakatsuji, H.; Caricato, M.; Li, X.; Hratchian, H. P.; Izmaylov, A. F.; Bloino, J.; Zheng, G. . S. Fri, G. . S. Gaussian 09, Revis. D.01. Wallingford, CT. 2009
- (2) Grimme, S. *Chem. Phys. Lett.* **1996**, *259* (1–2), 128–137. doi:10.1016/0009-2614(96)00722-1
- (3) Hirata, S.; Head-Gordon, M. *Chem. Phys. Lett.* **1999**, *314*, 291–299. doi:10.1016/S0009-2614(99)01149-5
- (4) Moral, M.; Muccioli, L.; Son, W. J.; Olivier, Y.; Sancho-Garcia, J. C. *J. Chem. Theory Comput.* **2015**, *11* (1), 168–177. doi:10.1021/ct500957s
- (5) Gao, X.; Bai, S.; Fazzi, D.; Niehaus, T.; Barbatti, M.; Thiel, W. *J. Chem. Theory Comput.* **2017**, *13* (2), 515–524. doi:10.1021/acs.jctc.6b00915
